# Supplementary material
Source: PubMed Central journal article supplement (PMC3967870)
Supplement: NIHMS561987-supplement-Supplementary_Data.pdf [file NIHMS561987-supplement-Supplementary_Data.pdf]

Supplemental Table 1.

| MicroRNA ABI Assay ID  | Raw CT  |         |       |       | 41-CT   |         |       |       | Relative Quantification Ratio = (41-CT) / (41-CT) |              |           |                 |
|------------------------|---------|---------|-------|-------|---------|---------|-------|-------|---------------------------------------------------|--------------|-----------|-----------------|
|                        | CntriCB | CntriHP | ADCB  | ADHP  | CntriCB | CntriHP | ADCB  | ADHP  | ADHP/CntriHP                                      | ADCB/CntriCB | ADHP/ADCB | CntriHP/CntriCB |
| MammU6-4395470         | 18.88   | 20.87   | 18.76 | 20.78 | 22.12   | 20.13   | 22.24 | 20.22 |                                                   |              |           |                 |
| RNU44-4373384          | 25.96   | 24.97   | 25.98 | 22.98 | 15.04   | 16.03   | 15.02 | 18.02 |                                                   |              |           |                 |
| RNU48-4373383          | 22.99   | 22.98   | 22.99 | 25.98 | 18.01   | 18.02   | 18.01 | 15.02 |                                                   |              |           |                 |
| MeanEndogenousControls | 22.61   | 22.94   | 22.58 | 23.25 | 18.39   | 18.06   | 18.42 | 17.75 |                                                   |              |           |                 |
| ath-miR159a-4373390    | 40.00   | 40.00   | 40.00 | 40.00 | 1.00    | 1.00    | 1.00  | 1.00  |                                                   |              |           |                 |
| hsa-miR-96-4373009     | 26.02   | 26.04   | 25.94 | 40.00 | 14.98   | 14.96   | 15.06 | 1.00  | 0.07                                              | 1.01         | 0.07      | 1.00            |
| hsa-miR-501-5p-4373226 | 26.74   | 27.04   | 24.99 | 36.00 | 14.26   | 13.96   | 16.01 | 5.00  | 0.36                                              | 1.12         | 0.31      | 0.98            |
| hsa-miR-342-3p-4395371 | 21.98   | 22.98   | 20.96 | 31.00 | 19.02   | 18.02   | 20.04 | 10.00 | 0.56                                              | 1.05         | 0.50      | 0.95            |
| hsa-miR-331-3p-4373046 | 21.98   | 22.97   | 21.97 | 30.97 | 19.02   | 18.03   | 19.03 | 10.03 | 0.56                                              | 1.00         | 0.53      | 0.95            |
| hsa-miR-323-4373049    | 22.97   | 22.99   | 23.99 | 30.96 | 18.03   | 18.01   | 17.01 | 10.04 | 0.56                                              | 0.94         | 0.59      | 1.00            |
| hsa-miR-370-4395386    | 26.00   | 25.99   | 26.99 | 31.98 | 15.00   | 15.01   | 14.01 | 9.02  | 0.60                                              | 0.93         | 0.64      | 1.00            |
| hsa-miR-204-4373094    | 20.97   | 21.93   | 20.97 | 28.97 | 20.03   | 19.07   | 20.03 | 12.03 | 0.63                                              | 1.00         | 0.60      | 0.95            |
| hsa-miR-211-4373088    | 22.13   | 22.11   | 40.00 | 28.98 | 18.87   | 18.89   | 1.00  | 12.02 | 0.64                                              | 0.05         | 12.02     | 1.00            |
| hsa-miR-330-3p-4373047 | 28.02   | 26.93   | 26.95 | 30.97 | 12.98   | 14.07   | 14.05 | 10.03 | 0.71                                              | 1.08         | 0.71      | 1.08            |
| hsa-miR-191-4395410    | 22.97   | 22.97   | 22.99 | 27.97 | 18.03   | 18.03   | 18.01 | 13.03 | 0.72                                              | 1.00         | 0.72      | 1.00            |
| hsa-miR-345-4373038    | 28.08   | 28.00   | 26.12 | 31.01 | 12.92   | 13.00   | 14.89 | 9.99  | 0.77                                              | 1.15         | 0.67      | 1.01            |
| hsa-miR-149-4395366    | 22.97   | 23.00   | 22.97 | 26.96 | 18.03   | 18.00   | 18.03 | 14.04 | 0.78                                              | 1.00         | 0.78      | 1.00            |
| hsa-miR-139-5p-4395400 | 25.98   | 21.97   | 25.98 | 25.96 | 15.02   | 19.03   | 15.02 | 15.04 | 0.79                                              | 1.00         | 1.00      | 1.27            |
| hsa-miR-208b-4395401   | 40.00   | 25.91   | 24.22 | 28.98 | 1.00    | 15.09   | 16.78 | 12.02 | 0.80                                              | 16.78        | 0.72      | 15.09           |
| hsa-miR-138-4395395    | 24.97   | 21.94   | 24.97 | 24.99 | 16.03   | 19.06   | 16.03 | 16.01 | 0.84                                              | 1.00         | 1.00      | 1.19            |
| hsa-miR-132-4373143    | 24.98   | 22.95   | 24.95 | 24.96 | 16.02   | 18.05   | 16.05 | 16.04 | 0.89                                              | 1.00         | 1.00      | 1.13            |
| hsa-miR-184-4373113    | 29.96   | 25.95   | 28.94 | 26.99 | 11.04   | 15.05   | 12.06 | 14.01 | 0.93                                              | 1.09         | 1.16      | 1.36            |
| hsa-miR-126-4395339    | 22.97   | 22.97   | 22.98 | 23.98 | 18.03   | 18.03   | 18.02 | 17.02 | 0.94                                              | 1.00         | 0.94      | 1.00            |
| hsa-miR-181c-4373115   | 28.95   | 29.99   | 29.99 | 26.98 | 12.05   | 11.01   | 11.01 | 14.02 | 1.27                                              | 0.91         | 1.27      | 0.91            |
| hsa-miR-152-4395170    | 29.97   | 29.97   | 28.96 | 26.96 | 11.03   | 11.03   | 12.04 | 14.04 | 1.27                                              | 1.09         | 1.17      | 1.00            |
| hsa-miR-15a-4373123    | 28.97   | 33.04   | 29.01 | 26.97 | 12.03   | 7.96    | 11.99 | 14.03 | 1.76                                              | 1.00         | 1.17      | 0.66            |
| hsa-miR-94373285       | 18.95   | 20.96   | 18.97 | 40.00 | 22.05   | 20.04   | 22.03 | 1.00  | 0.05                                              | 1.00         | 0.05      | 0.91            |
| hsa-miR-99a-4373008    | 23.99   | 23.98   | 23.99 | 40.00 | 17.01   | 17.02   | 17.01 | 1.00  | 0.06                                              | 1.00         | 0.06      | 1.00            |
| hsa-miR-98b-4373007    | 24.00   | 23.99   | 22.98 | 40.00 | 17.00   | 17.01   | 18.02 | 1.00  | 0.06                                              | 1.06         | 0.06      | 1.00            |
| hsa-miR-885-5p-4395407 | 22.99   | 24.98   | 22.96 | 40.00 | 18.01   | 16.02   | 18.04 | 1.00  | 0.06                                              | 1.00         | 0.06      | 0.89            |
| hsa-miR-539-4378103    | 25.96   | 25.94   | 25.97 | 40.00 | 15.04   | 15.06   | 15.03 | 1.00  | 0.07                                              | 1.00         | 0.07      | 1.00            |
| hsa-miR-886-3p-4395305 | 28.00   | 25.96   | 27.97 | 40.00 | 13.00   | 15.04   | 13.03 | 1.00  | 0.07                                              | 1.00         | 0.08      | 1.16            |
| hsa-miR-574-3p-4395460 | 27.99   | 25.99   | 26.93 | 40.00 | 13.01   | 15.01   | 14.07 | 1.00  | 0.07                                              | 1.08         | 0.07      | 1.15            |
| hsa-miR-744-4395435    | 27.95   | 26.97   | 27.97 | 40.00 | 13.05   | 14.03   | 13.03 | 1.00  | 0.07                                              | 1.00         | 0.08      | 1.08            |
| hsa-miR-95-4373011     | 25.96   | 26.97   | 25.97 | 40.00 | 15.04   | 14.03   | 15.03 | 1.00  | 0.07                                              | 1.00         | 0.07      | 0.93            |
| hsa-miR-92a-4395169    | 27.99   | 26.98   | 27.98 | 40.00 | 13.01   | 14.02   | 13.02 | 1.00  | 0.07                                              | 1.00         | 0.08      | 1.08            |
| hsa-miR-708-4395452    | 29.96   | 27.95   | 28.94 | 40.00 | 11.04   | 13.05   | 12.06 | 1.00  | 0.08                                              | 1.09         | 0.08      | 1.18            |
| hsa-miR-874-4395379    | 26.98   | 27.95   | 25.95 | 40.00 | 14.02   | 13.05   | 15.05 | 1.00  | 0.08                                              | 1.07         | 0.07      | 0.93            |
| hsa-miR-886-5p-4395304 | 29.97   | 27.96   | 29.99 | 40.00 | 11.03   | 13.04   | 11.01 | 1.00  | 0.08                                              | 1.00         | 0.09      | 1.18            |

Supplemental Table 1.

| MicroRNA ABI Assay ID   | Raw CT  |         |       |       | 41-CT   |         |       |      | Relative Quantification Ratio = (41-CT) / (41-CT) |              |           |                 |
|-------------------------|---------|---------|-------|-------|---------|---------|-------|------|---------------------------------------------------|--------------|-----------|-----------------|
|                         | CntrlCB | CntrlHP | ADCB  | ADHP  | CntrlCB | CntrlHP | ADCB  | ADHP | ADHP/CntrlHP                                      | ADCB/CntrlCB | ADHP/ADCB | CntrlHP/CntrlCB |
| hsa-miR-93-4373302      | 28.98   | 27.97   | 27.96 | 40.00 | 12.02   | 13.03   | 13.04 | 1.00 | 0.08                                              | 1.08         | 0.08      | 1.08            |
| hsa-miR-532-3p-4395466  | 26.99   | 27.98   | 26.97 | 40.00 | 14.01   | 13.02   | 14.03 | 1.00 | 0.08                                              | 1.00         | 0.07      | 0.93            |
| hsa-miR-548d-3p-4381008 | 40.00   | 28.73   | 40.00 | 40.00 | 1.00    | 12.27   | 1.00  | 1.00 | 0.08                                              | 1.00         | 1.00      | 12.27           |
| hsa-miR-576-5p-4395461  | 32.93   | 28.80   | 40.00 | 40.00 | 8.07    | 12.20   | 1.00  | 1.00 | 0.08                                              | 0.12         | 1.00      | 1.51            |
| hsa-miR-887-4395485     | 28.95   | 28.80   | 40.00 | 40.00 | 12.05   | 12.20   | 1.00  | 1.00 | 0.08                                              | 0.08         | 1.00      | 1.01            |
| hsa-miR-628-5p-4395544  | 27.92   | 28.93   | 28.94 | 40.00 | 13.08   | 12.07   | 12.06 | 1.00 | 0.08                                              | 0.92         | 0.08      | 0.92            |
| hsa-miR-598-4395179     | 27.98   | 28.96   | 27.98 | 40.00 | 13.02   | 12.04   | 13.02 | 1.00 | 0.08                                              | 1.00         | 0.08      | 0.92            |
| hsa-miR-532-5p-4380928  | 26.98   | 29.00   | 26.98 | 40.00 | 14.02   | 12.00   | 14.02 | 1.00 | 0.08                                              | 1.00         | 0.07      | 0.86            |
| hsa-miR-655-4381015     | 28.96   | 29.97   | 28.97 | 40.00 | 12.04   | 11.03   | 12.03 | 1.00 | 0.09                                              | 1.00         | 0.08      | 0.92            |
| hsa-miR-660-4380925     | 27.97   | 29.97   | 27.95 | 40.00 | 13.03   | 11.03   | 13.05 | 1.00 | 0.09                                              | 1.00         | 0.08      | 0.85            |
| hsa-miR-671-3p-4395433  | 29.97   | 29.98   | 30.98 | 40.00 | 11.03   | 11.02   | 10.02 | 1.00 | 0.09                                              | 0.91         | 0.10      | 1.00            |
| hsa-miR-652-4395463     | 29.96   | 30.00   | 29.99 | 40.00 | 11.04   | 11.00   | 11.01 | 1.00 | 0.09                                              | 1.00         | 0.09      | 1.00            |
| hsa-miR-616-4395525     | 34.04   | 31.14   | 40.00 | 40.00 | 6.96    | 9.86    | 1.00  | 1.00 | 0.10                                              | 0.14         | 1.00      | 1.42            |
| hsa-miR-590-5p-4395176  | 29.96   | 31.97   | 29.97 | 40.00 | 11.04   | 9.03    | 11.03 | 1.00 | 0.11                                              | 1.00         | 0.09      | 0.82            |
| hsa-miR-625-4395542     | 30.01   | 31.98   | 30.00 | 40.00 | 10.99   | 9.02    | 11.00 | 1.00 | 0.11                                              | 1.00         | 0.09      | 0.82            |
| hsa-miR-642-4380995     | 33.97   | 31.99   | 32.99 | 40.00 | 7.03    | 9.01    | 8.01  | 1.00 | 0.11                                              | 1.14         | 0.12      | 1.28            |
| hsa-miR-541-4395312     | 33.97   | 31.99   | 34.00 | 40.00 | 7.03    | 9.01    | 7.00  | 1.00 | 0.11                                              | 1.00         | 0.14      | 1.28            |
| hsa-miR-758-4395180     | 31.99   | 32.01   | 30.98 | 40.00 | 9.01    | 8.99    | 10.02 | 1.00 | 0.11                                              | 1.11         | 0.10      | 1.00            |
| hsa-miR-519d-4395514    | 34.78   | 32.89   | 33.96 | 40.00 | 6.22    | 8.11    | 7.04  | 1.00 | 0.12                                              | 1.13         | 0.14      | 1.30            |
| hsa-miR-891a-4395302    | 32.00   | 32.99   | 31.98 | 40.00 | 9.01    | 8.01    | 9.02  | 1.00 | 0.12                                              | 1.00         | 0.11      | 0.89            |
| hsa-miR-889-4395313     | 30.98   | 33.00   | 30.98 | 40.00 | 10.02   | 8.00    | 10.02 | 1.00 | 0.13                                              | 1.00         | 0.10      | 0.80            |
| hsa-miR-636-4395199     | 33.98   | 33.02   | 34.00 | 40.00 | 7.02    | 7.98    | 7.00  | 1.00 | 0.13                                              | 1.00         | 0.14      | 1.14            |
| hsa-miR-518d-3p-4373248 | 33.98   | 33.04   | 40.00 | 40.00 | 7.02    | 7.96    | 1.00  | 1.00 | 0.13                                              | 0.14         | 1.00      | 1.13            |
| hsa-miR-512-3p-4381034  | 40.00   | 33.08   | 35.98 | 40.00 | 1.00    | 7.92    | 5.02  | 1.00 | 0.13                                              | 5.02         | 0.20      | 7.92            |
| hsa-miR-582-3p-4395510  | 33.13   | 33.74   | 35.09 | 40.00 | 7.87    | 7.26    | 5.91  | 1.00 | 0.14                                              | 0.75         | 0.17      | 0.92            |
| hsa-miR-519a-4395526    | 36.04   | 33.93   | 33.98 | 40.00 | 4.96    | 7.07    | 7.02  | 1.00 | 0.14                                              | 1.41         | 0.14      | 1.42            |
| hsa-miR-548d-5p-4395348 | 34.96   | 33.95   | 34.98 | 40.00 | 6.04    | 7.05    | 6.02  | 1.00 | 0.14                                              | 1.00         | 0.17      | 1.17            |
| hsa-miR-548b-5p-4395519 | 40.00   | 33.97   | 35.95 | 40.00 | 1.00    | 7.03    | 5.05  | 1.00 | 0.14                                              | 5.05         | 0.20      | 7.03            |
| hsa-miR-511-4373236     | 40.00   | 33.97   | 40.00 | 40.00 | 1.00    | 7.03    | 1.00  | 1.00 | 0.14                                              | 1.00         | 1.00      | 7.03            |
| hsa-miR-597-4380960     | 32.97   | 33.99   | 32.96 | 40.00 | 8.03    | 7.01    | 8.04  | 1.00 | 0.14                                              | 1.00         | 0.12      | 0.87            |
| hsa-miR-522-4395524     | 34.98   | 34.00   | 40.00 | 40.00 | 6.02    | 7.00    | 1.00  | 1.00 | 0.14                                              | 0.17         | 1.00      | 1.16            |
| hsa-miR-654-5p-4381014  | 33.03   | 34.02   | 33.87 | 40.00 | 7.97    | 6.98    | 7.13  | 1.00 | 0.14                                              | 0.89         | 0.14      | 0.88            |
| hsa-miR-518d-5p-4395500 | 40.00   | 34.36   | 40.00 | 40.00 | 1.00    | 6.64    | 1.00  | 1.00 | 0.15                                              | 1.00         | 1.00      | 6.64            |
| hsa-miR-518e-4395506    | 34.08   | 34.79   | 33.80 | 40.00 | 6.92    | 6.21    | 7.20  | 1.00 | 0.16                                              | 1.04         | 0.14      | 0.90            |
| hsa-miR-517c-4373264    | 35.02   | 34.96   | 34.00 | 40.00 | 5.98    | 6.04    | 7.00  | 1.00 | 0.17                                              | 1.17         | 0.14      | 1.01            |
| hsa-miR-542-3p-4378101  | 40.00   | 34.96   | 35.17 | 40.00 | 1.00    | 6.04    | 5.84  | 1.00 | 0.17                                              | 5.84         | 0.17      | 6.04            |
| hsa-miR-876-3p-4395336  | 40.00   | 34.98   | 40.00 | 40.00 | 1.00    | 6.02    | 1.00  | 1.00 | 0.17                                              | 1.00         | 1.00      | 6.02            |
| hsa-miR-548c-5p-4395540 | 35.97   | 34.98   | 40.00 | 40.00 | 5.03    | 6.02    | 1.00  | 1.00 | 0.17                                              | 0.20         | 1.00      | 1.20            |
| hsa-miR-561-4380938     | 40.00   | 35.44   | 40.00 | 40.00 | 1.00    | 5.56    | 1.00  | 1.00 | 0.18                                              | 1.00         | 1.00      | 5.56            |

Supplemental Table 1.

| MicroRNA ABI Assay ID   | Raw CT  |         |       |       | 41-CT   |         |       |       | Relative Quantification Ratio = (41-CT) / (41-CT) |              |           |                 |
|-------------------------|---------|---------|-------|-------|---------|---------|-------|-------|---------------------------------------------------|--------------|-----------|-----------------|
|                         | CntrlCB | CntrlHP | ADCB  | ADHP  | CntrlCB | CntrlHP | ADCB  | ADHP  | ADHP/CntrlHP                                      | ADCB/CntrlCB | ADHP/ADCB | CntrlHP/CntrlCB |
| hsa-miR-556-5p-4395455  | 40.00   | 35.74   | 40.00 | 40.00 | 1.00    | 5.26    | 1.00  | 1.00  | 0.19                                              | 1.00         | 1.00      | 5.26            |
| hsa-miR-509-5p-4395346  | 40.00   | 35.88   | 31.86 | 40.00 | 1.00    | 5.12    | 9.14  | 1.00  | 0.20                                              | 9.14         | 0.11      | 5.12            |
| hsa-miR-589-4395520     | 33.98   | 35.95   | 33.98 | 40.00 | 7.02    | 5.05    | 7.02  | 1.00  | 0.20                                              | 1.00         | 0.14      | 0.72            |
| hsa-miR-548a-3p-4380948 | 40.00   | 35.96   | 35.97 | 40.00 | 1.00    | 5.04    | 5.04  | 1.00  | 0.20                                              | 5.04         | 0.20      | 5.04            |
| hsa-miR-618-4380996     | 34.99   | 35.99   | 32.98 | 40.00 | 6.01    | 5.01    | 8.02  | 1.00  | 0.20                                              | 1.33         | 0.12      | 0.83            |
| hsa-miR-888-4395323     | 33.97   | 35.99   | 33.97 | 40.00 | 7.03    | 5.01    | 7.03  | 1.00  | 0.20                                              | 1.00         | 0.14      | 0.71            |
| hsa-miR-517a-4395513    | 35.02   | 36.01   | 33.99 | 40.00 | 5.98    | 4.99    | 7.01  | 1.00  | 0.20                                              | 1.17         | 0.14      | 0.84            |
| hsa-miR-325-4373051     | 40.00   | 6.28    | 40.00 | 30.96 | 1.00    | 34.72   | 1.00  | 10.04 | 0.29                                              | 1.00         | 10.04     | 34.72           |
| hsa-miR-337-5p-4395267  | 32.98   | 15.17   | 33.00 | 30.98 | 8.02    | 25.83   | 8.00  | 10.02 | 0.39                                              | 1.00         | 1.25      | 3.22            |
| hsa-miR-495-4381078     | 26.95   | 27.96   | 27.98 | 35.90 | 14.05   | 13.04   | 13.02 | 5.10  | 0.39                                              | 0.93         | 0.39      | 0.93            |
| hsa-miR-491-5p-4381053  | 27.98   | 25.95   | 26.95 | 34.87 | 13.02   | 15.05   | 14.05 | 6.13  | 0.41                                              | 1.08         | 0.44      | 1.16            |
| hsa-miR-484-4381032     | 21.96   | 23.97   | 21.96 | 34.01 | 19.04   | 17.03   | 19.04 | 6.99  | 0.41                                              | 1.00         | 0.37      | 0.89            |
| hsa-miR-504-4395195     | 34.05   | 29.98   | 32.02 | 36.05 | 6.95    | 11.02   | 8.98  | 4.95  | 0.45                                              | 1.29         | 0.55      | 1.59            |
| hsa-miR-499-5p-4381047  | 40.00   | 29.88   | 31.80 | 35.97 | 1.00    | 11.12   | 9.20  | 5.03  | 0.45                                              | 9.20         | 0.55      | 11.12           |
| hsa-miR-485-3p-4378095  | 26.97   | 25.94   | 26.97 | 34.01 | 14.03   | 15.06   | 14.03 | 6.99  | 0.46                                              | 1.00         | 0.50      | 1.07            |
| hsa-miR-505-4395200     | 30.98   | 30.98   | 30.00 | 36.07 | 10.02   | 10.02   | 11.00 | 4.93  | 0.49                                              | 1.10         | 0.45      | 1.00            |
| hsa-miR-450b-5p-4395318 | 40.00   | 26.75   | 40.00 | 33.92 | 1.00    | 14.25   | 1.00  | 7.08  | 0.50                                              | 1.00         | 7.08      | 14.25           |
| hsa-miR-502-5p-4373227  | 32.00   | 31.10   | 31.95 | 36.01 | 9.00    | 9.90    | 9.05  | 4.99  | 0.50                                              | 1.01         | 0.55      | 1.10            |
| hsa-miR-487b-4378102    | 28.98   | 28.98   | 28.98 | 34.61 | 12.02   | 12.02   | 12.02 | 6.39  | 0.53                                              | 1.00         | 0.53      | 1.00            |
| hsa-miR-433-4373205     | 27.96   | 26.96   | 28.98 | 32.98 | 13.04   | 14.04   | 12.02 | 8.02  | 0.57                                              | 0.92         | 0.67      | 1.08            |
| hsa-miR-222-4395387     | 25.96   | 21.95   | 24.95 | 29.95 | 15.04   | 19.05   | 16.05 | 11.05 | 0.58                                              | 1.07         | 0.69      | 1.27            |
| hsa-miR-485-5p-4373212  | 28.96   | 29.00   | 28.95 | 34.03 | 12.04   | 12.00   | 12.05 | 6.97  | 0.58                                              | 1.00         | 0.58      | 1.00            |
| hsa-miR-454-4395434     | 25.96   | 28.96   | 25.96 | 33.99 | 15.04   | 12.04   | 15.05 | 7.01  | 0.58                                              | 1.00         | 0.47      | 0.80            |
| hsa-miR-494-4395476     | 29.97   | 30.97   | 29.96 | 35.05 | 11.03   | 10.03   | 11.04 | 5.95  | 0.59                                              | 1.00         | 0.54      | 0.91            |
| hsa-miR-486-5p-4378096  | 29.97   | 30.05   | 29.98 | 34.47 | 11.03   | 10.95   | 11.02 | 6.53  | 0.60                                              | 1.00         | 0.59      | 0.99            |
| hsa-miR-30c-4373060     | 20.97   | 22.97   | 20.96 | 30.24 | 20.03   | 18.03   | 20.04 | 10.76 | 0.60                                              | 1.00         | 0.54      | 0.90            |
| hsa-miR-382-4373019     | 25.98   | 26.01   | 26.00 | 32.02 | 15.02   | 14.99   | 15.00 | 8.98  | 0.60                                              | 1.00         | 0.60      | 1.00            |
| hsa-miR-374b-4381045    | 24.98   | 25.97   | 25.99 | 31.99 | 16.02   | 15.03   | 15.01 | 9.01  | 0.60                                              | 0.94         | 0.60      | 0.94            |
| hsa-miR-24-4373072      | 22.98   | 22.97   | 22.99 | 29.97 | 18.02   | 18.03   | 18.01 | 11.03 | 0.61                                              | 1.00         | 0.61      | 1.00            |
| hsa-miR-425-4380926     | 27.98   | 27.97   | 28.01 | 32.97 | 13.02   | 13.03   | 12.99 | 8.03  | 0.62                                              | 1.00         | 0.62      | 1.00            |
| hsa-miR-488-4395468     | 31.98   | 30.96   | 32.98 | 34.74 | 9.02    | 10.04   | 8.02  | 6.26  | 0.62                                              | 0.89         | 0.78      | 1.11            |
| hsa-miR-500-4395539     | 29.97   | 32.99   | 30.98 | 35.98 | 11.03   | 8.01    | 10.02 | 5.02  | 0.63                                              | 0.91         | 0.50      | 0.73            |
| hsa-miR-320-4395388     | 22.97   | 24.97   | 22.95 | 30.87 | 18.03   | 16.03   | 18.05 | 10.13 | 0.63                                              | 1.00         | 0.56      | 0.89            |
| hsa-miR-483-5p-4395449  | 30.96   | 29.96   | 30.94 | 34.00 | 10.04   | 11.04   | 10.06 | 7.00  | 0.63                                              | 1.00         | 0.70      | 1.10            |
| hsa-miR-383-4373018     | 25.97   | 26.94   | 25.97 | 32.06 | 15.03   | 14.06   | 15.03 | 8.94  | 0.64                                              | 1.00         | 0.59      | 0.94            |
| hsa-miR-451-4373360     | 29.97   | 29.95   | 28.97 | 33.96 | 11.03   | 11.05   | 12.03 | 7.04  | 0.64                                              | 1.09         | 0.59      | 1.00            |

Supplemental Table 1.

| MicroRNA ABI Assay ID  | Raw CT  |         |       |       | 41-CT   |         |       |       | Relative Quantification Ratio = (41-CT) / (41-CT) |              |           |                 |
|------------------------|---------|---------|-------|-------|---------|---------|-------|-------|---------------------------------------------------|--------------|-----------|-----------------|
|                        | CntrlCB | CntrlHP | ADCB  | ADHP  | CntrlCB | CntrlHP | ADCB  | ADHP  | ADHP/CntrlHP                                      | ADCB/CntrlCB | ADHP/ADCB | CntrlHP/CntrlCB |
| hsa-miR-30b-4373290    | 22.98   | 23.98   | 21.98 | 30.05 | 18.02   | 17.02   | 19.02 | 10.95 | 0.64                                              | 1.06         | 0.58      | 0.94            |
| hsa-miR-29a-4395223    | 23.96   | 23.95   | 22.94 | 30.01 | 17.04   | 17.05   | 18.06 | 10.99 | 0.64                                              | 1.06         | 0.61      | 1.00            |
| hsa-miR-26a-4395166    | 21.96   | 23.98   | 21.96 | 29.98 | 19.04   | 17.02   | 19.04 | 11.02 | 0.65                                              | 1.00         | 0.58      | 0.89            |
| hsa-miR-34a-4395168    | 26.97   | 26.99   | 26.98 | 31.85 | 14.03   | 14.01   | 14.02 | 9.15  | 0.65                                              | 1.00         | 0.65      | 1.00            |
| hsa-miR-411-4381013    | 26.95   | 28.97   | 27.99 | 32.96 | 14.05   | 12.03   | 13.01 | 8.04  | 0.67                                              | 0.93         | 0.62      | 0.86            |
| hsa-miR-410-4378093    | 27.95   | 28.97   | 28.95 | 32.91 | 13.05   | 12.03   | 12.05 | 8.09  | 0.67                                              | 0.92         | 0.67      | 0.92            |
| hsa-miR-490-3p-4373215 | 40.00   | 32.03   | 29.57 | 34.86 | 1.00    | 8.97    | 11.43 | 6.14  | 0.68                                              | 11.43        | 0.54      | 8.97            |
| hsa-miR-223-4395406    | 25.96   | 24.95   | 24.97 | 29.96 | 15.04   | 16.05   | 16.03 | 11.04 | 0.69                                              | 1.07         | 0.69      | 1.07            |
| hsa-miR-374a-4373028   | 26.96   | 27.94   | 27.98 | 31.99 | 14.04   | 13.06   | 13.02 | 9.01  | 0.69                                              | 0.93         | 0.69      | 0.93            |
| hsa-miR-376c-4395233   | 24.98   | 27.98   | 24.99 | 32.00 | 16.02   | 13.02   | 16.01 | 9.00  | 0.69                                              | 1.00         | 0.56      | 0.81            |
| hsa-miR-365-4373194    | 26.94   | 27.98   | 26.97 | 31.97 | 14.06   | 13.02   | 14.03 | 9.03  | 0.69                                              | 1.00         | 0.64      | 0.93            |
| hsa-miR-455-3p-4395355 | 27.95   | 30.97   | 27.98 | 33.99 | 13.05   | 10.03   | 13.02 | 7.01  | 0.70                                              | 1.00         | 0.54      | 0.77            |
| hsa-miR-323-3p-4395338 | 25.96   | 26.96   | 25.98 | 30.91 | 15.04   | 14.04   | 15.02 | 10.09 | 0.72                                              | 1.00         | 0.67      | 0.93            |
| hsa-miR-23a-4373074    | 40.00   | 25.81   | 40.00 | 29.96 | 1.00    | 15.19   | 1.00  | 11.04 | 0.73                                              | 1.00         | 11.04     | 15.19           |
| hsa-miR-376a-4373026   | 27.98   | 28.97   | 27.97 | 32.00 | 13.02   | 12.03   | 13.03 | 9.00  | 0.75                                              | 1.00         | 0.69      | 0.92            |
| hsa-miR-375-4373027    | 30.97   | 28.96   | 30.98 | 31.99 | 10.03   | 12.04   | 10.02 | 9.01  | 0.75                                              | 1.00         | 0.90      | 1.20            |
| hsa-miR-218-4373081    | 21.94   | 24.97   | 21.97 | 29.00 | 19.06   | 16.03   | 19.03 | 12.00 | 0.75                                              | 1.00         | 0.63      | 0.84            |
| hsa-miR-379-4373349    | 26.94   | 28.99   | 26.95 | 32.01 | 14.06   | 12.01   | 14.05 | 8.99  | 0.75                                              | 1.00         | 0.64      | 0.85            |
| hsa-miR-31-4395390     | 22.97   | 26.97   | 21.98 | 30.49 | 18.03   | 14.03   | 19.02 | 10.51 | 0.75                                              | 1.06         | 0.55      | 0.78            |
| hsa-miR-496-4386771    | 40.00   | 34.31   | 36.03 | 35.96 | 1.00    | 6.69    | 4.97  | 5.04  | 0.75                                              | 4.97         | 1.02      | 6.69            |
| hsa-miR-197-4373102    | 24.00   | 24.00   | 23.97 | 27.98 | 17.00   | 17.00   | 17.03 | 13.02 | 0.77                                              | 1.00         | 0.76      | 1.00            |
| hsa-miR-345-4395297    | 26.98   | 27.98   | 25.95 | 31.00 | 14.02   | 13.02   | 15.05 | 10.00 | 0.77                                              | 1.07         | 0.66      | 0.93            |
| hsa-miR-324-5p-4373052 | 27.96   | 27.94   | 27.96 | 30.96 | 13.04   | 13.06   | 13.04 | 10.04 | 0.77                                              | 1.00         | 0.77      | 1.00            |
| hsa-miR-339-3p-4395295 | 26.98   | 27.98   | 26.99 | 30.99 | 14.02   | 13.02   | 14.01 | 10.01 | 0.77                                              | 1.00         | 0.71      | 0.93            |
| hsa-miR-339-5p-4395368 | 28.03   | 27.98   | 28.99 | 30.99 | 12.97   | 13.02   | 12.01 | 10.01 | 0.77                                              | 0.93         | 0.83      | 1.00            |
| hsa-miR-489-4395469    | 35.07   | 32.98   | 33.97 | 34.82 | 5.93    | 8.02    | 7.03  | 6.18  | 0.77                                              | 1.19         | 0.88      | 1.35            |
| hsa-miR-26b-4395167    | 24.97   | 26.97   | 24.96 | 29.98 | 16.03   | 14.03   | 16.04 | 11.02 | 0.79                                              | 1.00         | 0.69      | 0.88            |
| hsa-miR-221-4373077    | 30.96   | 27.01   | 30.98 | 29.95 | 10.04   | 13.99   | 10.02 | 11.05 | 0.79                                              | 1.00         | 1.10      | 1.39            |
| hsa-miR-487a-4378097   | 32.97   | 32.97   | 32.98 | 34.59 | 8.03    | 8.03    | 8.02  | 6.41  | 0.80                                              | 1.00         | 0.80      | 1.00            |
| hsa-miR-423-5p-4395451 | 30.95   | 31.01   | 29.97 | 32.96 | 10.05   | 9.99    | 11.03 | 8.04  | 0.80                                              | 1.10         | 0.73      | 0.99            |
| hsa-miR-193b-4395478   | 25.96   | 24.98   | 26.98 | 27.97 | 15.04   | 16.02   | 14.02 | 13.03 | 0.81                                              | 0.93         | 0.93      | 1.07            |
| hsa-miR-34c-5p-4373036 | 36.01   | 29.99   | 35.01 | 31.95 | 4.99    | 11.01   | 5.99  | 9.05  | 0.82                                              | 1.20         | 1.51      | 2.21            |
| hsa-miR-181a-4373117   | 24.98   | 23.97   | 24.99 | 26.98 | 16.02   | 17.03   | 16.01 | 14.02 | 0.82                                              | 1.00         | 0.88      | 1.06            |

Supplemental Table 1.

| MicroRNA ABI Assay ID    | Raw CT  |         |       |       | 41-CT   |         |       |       | Relative Quantification Ratio = (41-CT) / (41-CT) |              |           |                 |
|--------------------------|---------|---------|-------|-------|---------|---------|-------|-------|---------------------------------------------------|--------------|-----------|-----------------|
|                          | CntrlCB | CntrlHP | ADCB  | ADHP  | CntrlCB | CntrlHP | ADCB  | ADHP  | ADHP/CntrlHP                                      | ADCB/CntrlCB | ADHP/ADCB | CntrlHP/CntrlCB |
| hsa-miR-19b-4373098      | 25.00   | 25.98   | 24.97 | 28.61 | 16.00   | 15.02   | 16.03 | 12.39 | 0.83                                              | 1.00         | 0.77      | 0.94            |
| hsa-miR-502-3p-4395194   | 33.99   | 34.98   | 32.97 | 36.01 | 7.01    | 6.02    | 8.03  | 4.99  | 0.83                                              | 1.15         | 0.62      | 0.86            |
| hsa-miR-340-4395369      | 27.97   | 28.97   | 27.97 | 30.99 | 13.03   | 12.03   | 13.03 | 10.01 | 0.83                                              | 1.00         | 0.77      | 0.92            |
| hsa-miR-145-4395389      | 22.98   | 22.97   | 22.95 | 25.98 | 18.02   | 18.03   | 18.05 | 15.02 | 0.83                                              | 1.00         | 0.83      | 1.00            |
| hsa-miR-324-3p-4395272   | 27.99   | 28.98   | 27.97 | 30.95 | 13.01   | 12.02   | 13.03 | 10.05 | 0.84                                              | 1.00         | 0.77      | 0.92            |
| hsa-miR-342-5p-4395258   | 27.98   | 29.04   | 27.99 | 31.00 | 13.02   | 11.96   | 13.01 | 10.00 | 0.84                                              | 1.00         | 0.77      | 0.92            |
| hsa-miR-28-3p-4395557    | 26.97   | 27.95   | 25.94 | 29.98 | 14.03   | 13.05   | 15.06 | 11.02 | 0.84                                              | 1.07         | 0.73      | 0.93            |
| hsa-miR-20a-4373286      | 26.98   | 26.98   | 26.98 | 28.98 | 14.02   | 14.02   | 14.02 | 12.02 | 0.86                                              | 1.00         | 0.86      | 1.00            |
| hsa-miR-210-4373089      | 27.05   | 26.98   | 26.98 | 28.98 | 13.95   | 14.02   | 14.02 | 12.02 | 0.86                                              | 1.01         | 0.86      | 1.01            |
| hsa-miR-150-4373127      | 24.95   | 24.97   | 24.97 | 26.96 | 16.05   | 16.03   | 16.03 | 14.04 | 0.88                                              | 1.00         | 0.88      | 1.00            |
| hsa-miR-16-4373121       | 22.98   | 24.99   | 22.98 | 26.97 | 18.02   | 16.01   | 18.02 | 14.03 | 0.88                                              | 1.00         | 0.78      | 0.89            |
| hsa-miR-361-5p-4373035   | 29.98   | 30.99   | 30.99 | 31.96 | 11.02   | 10.01   | 10.01 | 9.04  | 0.90                                              | 0.91         | 0.90      | 0.91            |
| hsa-miR-409-5p-4395442   | 31.99   | 32.00   | 31.98 | 32.83 | 9.01    | 9.00    | 9.02  | 8.17  | 0.91                                              | 1.00         | 0.91      | 1.00            |
| hsa-miR-335-4373045      | 29.97   | 29.97   | 29.96 | 30.98 | 11.03   | 11.03   | 11.04 | 10.02 | 0.91                                              | 1.00         | 0.91      | 1.00            |
| hsa-miR-331-5p-4395344   | 30.96   | 30.03   | 31.00 | 30.98 | 10.04   | 10.97   | 10.00 | 10.02 | 0.91                                              | 1.00         | 1.00      | 1.09            |
| hsa-miR-27b-4373068      | 27.96   | 28.97   | 27.97 | 29.98 | 13.04   | 12.03   | 13.03 | 11.02 | 0.92                                              | 1.00         | 0.85      | 0.92            |
| hsa-miR-219-2-3p-4395501 | 29.99   | 27.95   | 29.98 | 29.01 | 11.01   | 13.05   | 11.02 | 11.99 | 0.92                                              | 1.00         | 1.09      | 1.19            |
| hsa-miR-186-4395396      | 24.95   | 25.94   | 24.95 | 27.12 | 16.05   | 15.06   | 16.05 | 13.88 | 0.92                                              | 1.00         | 0.86      | 0.94            |
| hsa-miR-212-4373087      | 28.98   | 27.98   | 29.99 | 28.98 | 12.02   | 13.02   | 11.02 | 12.02 | 0.92                                              | 0.92         | 1.09      | 1.08            |
| hsa-miR-195-4373105      | 23.98   | 26.96   | 23.96 | 27.98 | 17.02   | 14.04   | 17.04 | 13.02 | 0.93                                              | 1.00         | 0.76      | 0.82            |
| hsa-miR-17-4395419       | 25.95   | 25.96   | 25.96 | 26.97 | 15.05   | 15.04   | 15.04 | 14.03 | 0.93                                              | 1.00         | 0.93      | 1.00            |
| hsa-miR-125b-4373148     | 22.98   | 22.99   | 21.94 | 23.97 | 18.02   | 18.01   | 19.06 | 17.03 | 0.95                                              | 1.06         | 0.89      | 1.00            |
| hsa-miR-29c-4395171      | 28.00   | 29.99   | 27.98 | 30.02 | 13.00   | 11.01   | 13.02 | 10.99 | 1.00                                              | 1.00         | 0.84      | 0.85            |
| hsa-miR-127-3p-4373147   | 23.98   | 23.95   | 23.98 | 23.98 | 17.02   | 17.05   | 17.02 | 17.02 | 1.00                                              | 1.00         | 1.00      | 1.00            |
| hsa-miR-25-4373071       | 29.95   | 29.96   | 28.95 | 29.97 | 11.05   | 11.04   | 12.05 | 11.03 | 1.00                                              | 1.09         | 0.91      | 1.00            |
| hsa-miR-455-5p-4378098   | 28.97   | 33.99   | 27.98 | 34.00 | 12.03   | 7.01    | 13.02 | 7.00  | 1.00                                              | 1.08         | 0.54      | 0.58            |
| hsa-miR-146a-4373132     | 25.94   | 25.98   | 25.98 | 25.99 | 15.06   | 15.02   | 15.02 | 15.01 | 1.00                                              | 1.00         | 1.00      | 1.00            |
| hsa-miR-509-3-5p-4395266 | 40.00   | 40.00   | 40.00 | 40.00 | 1.00    | 1.00    | 1.00  | 1.00  | 1.00                                              | 1.00         | 1.00      | 1.00            |
| hsa-miR-510-4395352      | 40.00   | 40.00   | 40.00 | 40.00 | 1.00    | 1.00    | 1.00  | 1.00  | 1.00                                              | 1.00         | 1.00      | 1.00            |
| hsa-miR-512-5p-4373238   | 40.00   | 40.00   | 40.00 | 40.00 | 1.00    | 1.00    | 1.00  | 1.00  | 1.00                                              | 1.00         | 1.00      | 1.00            |
| hsa-miR-513-5p-4395201   | 40.00   | 40.00   | 40.00 | 40.00 | 1.00    | 1.00    | 1.00  | 1.00  | 1.00                                              | 1.00         | 1.00      | 1.00            |
| hsa-miR-515-3p-4395480   | 40.00   | 40.00   | 40.00 | 40.00 | 1.00    | 1.00    | 1.00  | 1.00  | 1.00                                              | 1.00         | 1.00      | 1.00            |
| hsa-miR-515-5p-4373242   | 28.29   | 40.00   | 40.00 | 40.00 | 12.71   | 1.00    | 1.00  | 1.00  | 1.00                                              | 0.08         | 1.00      | 0.08            |
| hsa-miR-516a-5p-4395527  | 40.00   | 40.00   | 40.00 | 40.00 | 1.00    | 1.00    | 1.00  | 1.00  | 1.00                                              | 1.00         | 1.00      | 1.00            |
| hsa-miR-516b-4395172     | 40.00   | 40.00   | 36.00 | 40.00 | 1.00    | 1.00    | 5.00  | 1.00  | 1.00                                              | 5.00         | 0.20      | 1.00            |
| hsa-miR-517b-4373244     | 40.00   | 40.00   | 40.00 | 40.00 | 1.00    | 1.00    | 1.00  | 1.00  | 1.00                                              | 1.00         | 1.00      | 1.00            |
| hsa-miR-518a-3p-4395508  | 35.98   | 40.00   | 40.00 | 40.00 | 5.02    | 1.00    | 1.00  | 1.00  | 1.00                                              | 0.20         | 1.00      | 0.20            |
| hsa-miR-518a-5p-4395507  | 40.00   | 40.00   | 40.00 | 40.00 | 1.00    | 1.00    | 1.00  | 1.00  | 1.00                                              | 1.00         | 1.00      | 1.00            |
| hsa-miR-518b-4373246     | 30.61   | 40.00   | 34.92 | 40.00 | 10.39   | 1.00    | 6.08  | 1.00  | 1.00                                              | 0.58         | 0.16      | 0.10            |

Supplemental Table 1.

| MicroRNA ABI Assay ID   | Raw CT  |         |       |       | 41-CT   |         |       |      | Relative Quantification Ratio = (41-CT) / (41-CT) |              |           |                 |      |
|-------------------------|---------|---------|-------|-------|---------|---------|-------|------|---------------------------------------------------|--------------|-----------|-----------------|------|
|                         | CntrlCB | CntrlHP | ADCB  | ADHP  | CntrlCB | CntrlHP | ADCB  | ADHP | ADHP/CntrlHP                                      | ADCB/CntrlCB | ADHP/ADCB | CntrlHP/CntrlCB |      |
| hsa-miR-518c-4395512    | 40.00   | 40.00   | 40.00 | 40.00 | 1.00    | 1.00    | 1.00  | 1.00 | 1.00                                              | 1.00         | 1.00      | 1.00            | 1.00 |
| hsa-miR-518f-4395499    | 40.00   | 40.00   | 37.14 | 40.00 | 1.00    | 1.00    | 3.86  | 1.00 | 1.00                                              | 3.86         | 0.26      | 1.00            | 1.00 |
| hsa-miR-519c-3p-4373251 | 40.00   | 40.00   | 36.97 | 40.00 | 1.00    | 1.00    | 4.03  | 1.00 | 1.00                                              | 4.03         | 0.25      | 1.00            | 1.00 |
| hsa-miR-519e-4395481    | 40.00   | 40.00   | 40.00 | 40.00 | 1.00    | 1.00    | 1.00  | 1.00 | 1.00                                              | 1.00         | 1.00      | 1.00            | 1.00 |
| hsa-miR-520a-3p-4373268 | 40.00   | 40.00   | 34.00 | 40.00 | 1.00    | 1.00    | 7.00  | 1.00 | 1.00                                              | 7.00         | 0.14      | 1.00            | 1.00 |
| hsa-miR-520a-5p-4378085 | 40.00   | 40.00   | 40.00 | 40.00 | 1.00    | 1.00    | 1.00  | 1.00 | 1.00                                              | 1.00         | 1.00      | 1.00            | 1.00 |
| hsa-miR-520b-4373252    | 36.93   | 40.00   | 40.00 | 40.00 | 4.07    | 1.00    | 1.00  | 1.00 | 1.00                                              | 0.25         | 1.00      | 0.25            | 1.00 |
| hsa-miR-520d-5p-4395504 | 40.00   | 40.00   | 40.00 | 40.00 | 1.00    | 1.00    | 1.00  | 1.00 | 1.00                                              | 1.00         | 1.00      | 1.00            | 1.00 |
| hsa-miR-520e-4373255    | 40.00   | 40.00   | 40.00 | 40.00 | 1.00    | 1.00    | 1.00  | 1.00 | 1.00                                              | 1.00         | 1.00      | 1.00            | 1.00 |
| hsa-miR-520f-4373256    | 40.00   | 40.00   | 40.00 | 40.00 | 1.00    | 1.00    | 1.00  | 1.00 | 1.00                                              | 1.00         | 1.00      | 1.00            | 1.00 |
| hsa-miR-520g-4373257    | 40.00   | 40.00   | 40.00 | 40.00 | 1.00    | 1.00    | 1.00  | 1.00 | 1.00                                              | 1.00         | 1.00      | 1.00            | 1.00 |
| hsa-miR-521-4373259     | 8.94    | 40.00   | 35.99 | 40.00 | 32.06   | 1.00    | 5.01  | 1.00 | 1.00                                              | 0.16         | 0.20      | 0.03            | 1.00 |
| hsa-miR-523-4395497     | 40.00   | 40.00   | 35.99 | 40.00 | 1.00    | 1.00    | 5.01  | 1.00 | 1.00                                              | 5.01         | 0.20      | 1.00            | 1.00 |
| hsa-miR-524-5p-4395174  | 40.00   | 40.00   | 40.00 | 40.00 | 1.00    | 1.00    | 1.00  | 1.00 | 1.00                                              | 1.00         | 1.00      | 1.00            | 1.00 |
| hsa-miR-525-3p-4395496  | 40.00   | 40.00   | 12.55 | 40.00 | 1.00    | 1.00    | 28.45 | 1.00 | 1.00                                              | 28.45        | 0.04      | 1.00            | 1.00 |
| hsa-miR-525-5p-4378088  | 40.00   | 40.00   | 40.00 | 40.00 | 1.00    | 1.00    | 1.00  | 1.00 | 1.00                                              | 1.00         | 1.00      | 1.00            | 1.00 |
| hsa-miR-526b-4395493    | 40.00   | 40.00   | 40.00 | 40.00 | 1.00    | 1.00    | 1.00  | 1.00 | 1.00                                              | 1.00         | 1.00      | 1.00            | 1.00 |
| hsa-miR-542-5p-4395351  | 40.00   | 40.00   | 40.00 | 40.00 | 1.00    | 1.00    | 1.00  | 1.00 | 1.00                                              | 1.00         | 1.00      | 1.00            | 1.00 |
| hsa-miR-544-4395376     | 40.00   | 40.00   | 40.00 | 40.00 | 1.00    | 1.00    | 1.00  | 1.00 | 1.00                                              | 1.00         | 1.00      | 1.00            | 1.00 |
| hsa-miR-545-4395378     | 35.96   | 40.00   | 35.05 | 40.00 | 5.04    | 1.00    | 5.95  | 1.00 | 1.00                                              | 1.18         | 0.17      | 0.20            | 1.00 |
| hsa-miR-548a-5p-4395523 | 40.00   | 40.00   | 20.75 | 40.00 | 1.00    | 1.00    | 20.25 | 1.00 | 1.00                                              | 20.25        | 0.05      | 1.00            | 1.00 |
| hsa-miR-548b-3p-4380951 | 40.00   | 40.00   | 40.00 | 40.00 | 1.00    | 1.00    | 1.00  | 1.00 | 1.00                                              | 1.00         | 1.00      | 1.00            | 1.00 |
| hsa-miR-548c-3p-4380993 | 12.03   | 40.00   | 40.00 | 40.00 | 28.97   | 1.00    | 1.00  | 1.00 | 1.00                                              | 0.03         | 1.00      | 0.03            | 1.00 |
| hsa-miR-551b-4380945    | 35.96   | 40.00   | 33.97 | 40.00 | 5.04    | 1.00    | 7.03  | 1.00 | 1.00                                              | 1.40         | 0.14      | 0.20            | 1.00 |
| hsa-miR-556-3p-4395456  | 40.00   | 40.00   | 34.96 | 40.00 | 1.00    | 1.00    | 6.04  | 1.00 | 1.00                                              | 6.04         | 0.17      | 1.00            | 1.00 |
| hsa-miR-570-4395458     | 40.00   | 40.00   | 35.95 | 40.00 | 1.00    | 1.00    | 5.05  | 1.00 | 1.00                                              | 5.05         | 0.20      | 1.00            | 1.00 |
| hsa-miR-576-3p-4395462  | 36.99   | 40.00   | 34.96 | 40.00 | 4.01    | 1.00    | 6.04  | 1.00 | 1.00                                              | 1.51         | 0.17      | 0.25            | 1.00 |
| hsa-miR-579-4395509     | 34.98   | 40.00   | 34.97 | 40.00 | 6.02    | 1.00    | 6.03  | 1.00 | 1.00                                              | 1.00         | 0.17      | 0.17            | 1.00 |
| hsa-miR-582-5p-4395175  | 40.00   | 40.00   | 40.00 | 40.00 | 1.00    | 1.00    | 1.00  | 1.00 | 1.00                                              | 1.00         | 1.00      | 1.00            | 1.00 |
| hsa-miR-615-3p-4386777  | 40.00   | 40.00   | 40.00 | 40.00 | 1.00    | 1.00    | 1.00  | 1.00 | 1.00                                              | 1.00         | 1.00      | 1.00            | 1.00 |
| hsa-miR-615-5p-4395464  | 40.00   | 40.00   | 40.00 | 40.00 | 1.00    | 1.00    | 1.00  | 1.00 | 1.00                                              | 1.00         | 1.00      | 1.00            | 1.00 |
| hsa-miR-624-4395541     | 40.00   | 40.00   | 40.00 | 40.00 | 1.00    | 1.00    | 1.00  | 1.00 | 1.00                                              | 1.00         | 1.00      | 1.00            | 1.00 |
| hsa-miR-627-4380967     | 40.00   | 40.00   | 40.00 | 40.00 | 1.00    | 1.00    | 1.00  | 1.00 | 1.00                                              | 1.00         | 1.00      | 1.00            | 1.00 |
| hsa-miR-629-4395547     | 40.00   | 40.00   | 33.98 | 40.00 | 1.00    | 1.00    | 7.02  | 1.00 | 1.00                                              | 7.02         | 0.14      | 1.00            | 1.00 |

Supplemental Table 1.

| MicroRNA ABI Assay ID   | Raw CT  |         |       |       | 41-CT   |         |       |       | Relative Quantification Ratio = (41-CT) / (41-CT) |              |           |                 |
|-------------------------|---------|---------|-------|-------|---------|---------|-------|-------|---------------------------------------------------|--------------|-----------|-----------------|
|                         | CntrlCB | CntrlHP | ADCB  | ADHP  | CntrlCB | CntrlHP | ADCB  | ADHP  | ADHP/CntrlHP                                      | ADCB/CntrlCB | ADHP/ADCB | CntrlHP/CntrlCB |
| hsa-miR-651-4381007     | 34.97   | 40.00   | 40.00 | 40.00 | 6.03    | 1.00    | 1.00  | 1.00  | 1.00                                              | 0.17         | 1.00      | 0.17            |
| hsa-miR-653-4395403     | 40.00   | 40.00   | 40.00 | 40.00 | 1.00    | 1.00    | 1.00  | 1.00  | 1.00                                              | 1.00         | 1.00      | 1.00            |
| hsa-miR-654-3p-4395350  | 33.98   | 40.00   | 32.96 | 40.00 | 7.02    | 1.00    | 8.04  | 1.00  | 1.00                                              | 1.14         | 0.12      | 0.14            |
| hsa-miR-672-4395438     | 40.00   | 40.00   | 40.00 | 40.00 | 1.00    | 1.00    | 1.00  | 1.00  | 1.00                                              | 1.00         | 1.00      | 1.00            |
| hsa-miR-674-4395193     | 40.00   | 40.00   | 40.00 | 40.00 | 1.00    | 1.00    | 1.00  | 1.00  | 1.00                                              | 1.00         | 1.00      | 1.00            |
| hsa-miR-871-4395465     | 40.00   | 40.00   | 40.00 | 40.00 | 1.00    | 1.00    | 1.00  | 1.00  | 1.00                                              | 1.00         | 1.00      | 1.00            |
| hsa-miR-872-4395375     | 40.00   | 40.00   | 40.00 | 40.00 | 1.00    | 1.00    | 1.00  | 1.00  | 1.00                                              | 1.00         | 1.00      | 1.00            |
| hsa-miR-873-4395467     | 40.00   | 40.00   | 40.00 | 40.00 | 1.00    | 1.00    | 1.00  | 1.00  | 1.00                                              | 1.00         | 1.00      | 1.00            |
| hsa-miR-875-3p-4395315  | 40.00   | 40.00   | 40.00 | 40.00 | 1.00    | 1.00    | 1.00  | 1.00  | 1.00                                              | 1.00         | 1.00      | 1.00            |
| hsa-miR-876-5p-4395316  | 40.00   | 40.00   | 40.00 | 40.00 | 1.00    | 1.00    | 1.00  | 1.00  | 1.00                                              | 1.00         | 1.00      | 1.00            |
| hsa-miR-885-3p-4395483  | 29.21   | 40.00   | 27.02 | 40.00 | 11.79   | 1.00    | 13.98 | 1.00  | 1.00                                              | 1.19         | 0.07      | 0.08            |
| hsa-miR-890-4395320     | 40.00   | 40.00   | 31.92 | 40.00 | 1.00    | 1.00    | 9.08  | 1.00  | 1.00                                              | 9.08         | 0.11      | 1.00            |
| hsa-miR-891b-4395321    | 40.00   | 40.00   | 40.00 | 40.00 | 1.00    | 1.00    | 1.00  | 1.00  | 1.00                                              | 1.00         | 1.00      | 1.00            |
| hsa-miR-892a-4395306    | 40.00   | 40.00   | 40.00 | 40.00 | 1.00    | 1.00    | 1.00  | 1.00  | 1.00                                              | 1.00         | 1.00      | 1.00            |
| hsa-miR-96-4373372      | 40.00   | 40.00   | 40.00 | 40.00 | 1.00    | 1.00    | 1.00  | 1.00  | 1.00                                              | 1.00         | 1.00      | 1.00            |
| hsa-miR-21-4373090      | 27.97   | 28.98   | 27.98 | 28.98 | 13.03   | 12.02   | 13.02 | 12.02 | 1.00                                              | 1.00         | 0.92      | 0.92            |
| hsa-miR-27a-4373287     | 29.97   | 29.98   | 30.00 | 29.98 | 11.03   | 11.02   | 11.00 | 11.02 | 1.00                                              | 1.00         | 1.00      | 1.00            |
| hsa-miR-422a-4395408    | 33.01   | 32.97   | 33.97 | 32.96 | 7.99    | 8.03    | 7.03  | 8.04  | 1.00                                              | 0.88         | 1.14      | 1.00            |
| hsa-miR-20b-4373263     | 29.97   | 28.99   | 28.98 | 28.98 | 11.03   | 12.01   | 12.02 | 12.02 | 1.00                                              | 1.09         | 1.00      | 1.09            |
| hsa-miR-452-4395440     | 32.97   | 33.98   | 30.13 | 33.98 | 8.03    | 7.02    | 10.87 | 7.03  | 1.00                                              | 1.35         | 0.65      | 0.87            |
| hsa-miR-15b-4373122     | 26.99   | 26.98   | 26.98 | 26.97 | 14.01   | 14.02   | 14.02 | 14.03 | 1.00                                              | 1.00         | 1.00      | 1.00            |
| hsa-miR-296-5p-4373066  | 29.99   | 30.00   | 29.93 | 29.99 | 11.01   | 11.00   | 11.07 | 11.01 | 1.00                                              | 1.00         | 1.00      | 1.00            |
| hsa-miR-338-3p-4395363  | 31.01   | 31.00   | 29.97 | 30.98 | 9.99    | 10.00   | 11.03 | 10.02 | 1.00                                              | 1.10         | 0.91      | 1.00            |
| hsa-let-7e-4395517      | 21.96   | 22.99   | 22.00 | 22.95 | 19.04   | 18.01   | 19.00 | 18.05 | 1.00                                              | 1.00         | 0.95      | 0.95            |
| hsa-miR-23b-4373073     | 30.00   | 30.02   | 30.03 | 29.97 | 11.01   | 10.98   | 10.97 | 11.03 | 1.00                                              | 1.00         | 1.01      | 1.00            |
| hsa-miR-363-4378090     | 30.78   | 32.02   | 33.00 | 31.96 | 10.22   | 8.98    | 8.00  | 9.04  | 1.01                                              | 0.78         | 1.13      | 0.88            |
| hsa-let-7b-4395446      | 20.94   | 23.00   | 21.00 | 21.97 | 20.06   | 18.00   | 20.00 | 19.03 | 1.06                                              | 1.00         | 0.95      | 0.90            |
| hsa-miR-139-3p-4395424  | 29.96   | 25.96   | 29.01 | 25.00 | 11.04   | 15.04   | 11.99 | 16.00 | 1.06                                              | 1.09         | 1.33      | 1.36            |
| hsa-miR-299-5p-4373188  | 30.96   | 30.69   | 31.01 | 30.01 | 10.04   | 10.31   | 9.99  | 10.99 | 1.07                                              | 0.99         | 1.10      | 1.03            |
| hsa-miR-146b-5p-4373178 | 26.99   | 26.98   | 26.96 | 26.00 | 14.01   | 14.02   | 14.04 | 15.00 | 1.07                                              | 1.00         | 1.07      | 1.00            |
| hsa-miR-219-5p-4373080  | 29.96   | 29.97   | 29.95 | 29.02 | 11.04   | 11.03   | 11.05 | 11.98 | 1.09                                              | 1.00         | 1.08      | 1.00            |
| hsa-miR-301a-4373064    | 28.97   | 30.96   | 28.95 | 30.02 | 12.03   | 10.04   | 12.05 | 10.99 | 1.09                                              | 1.00         | 0.91      | 0.83            |
| hsa-miR-28-5p-4373067   | 29.97   | 30.95   | 28.95 | 29.98 | 11.03   | 10.05   | 12.05 | 11.02 | 1.10                                              | 1.09         | 0.91      | 0.91            |
| hsa-miR-329-4373191     | 31.99   | 31.99   | 31.99 | 30.97 | 9.01    | 9.01    | 9.01  | 10.03 | 1.11                                              | 1.00         | 1.11      | 1.00            |
| hsa-miR-330-5p-4395341  | 33.09   | 32.02   | 31.99 | 30.97 | 7.91    | 8.98    | 9.01  | 10.03 | 1.12                                              | 1.14         | 1.11      | 1.13            |

Supplemental Table 1.

| MicroRNA ABI Assay ID   | Raw CT  |         |       |       | 41-CT   |         |       |       | Relative Quantification Ratio = (41-CT) / (41-CT) |              |           |                 |
|-------------------------|---------|---------|-------|-------|---------|---------|-------|-------|---------------------------------------------------|--------------|-----------|-----------------|
|                         | CntrlCB | CntrlHP | ADCB  | ADHP  | CntrlCB | CntrlHP | ADCB  | ADHP  | ADHP/CntrlHP                                      | ADCB/CntrlCB | ADHP/ADCB | CntrlHP/CntrlCB |
| hsa-miR-326-4373050     | 34.93   | 32.02   | 33.98 | 30.96 | 6.07    | 8.98    | 7.02  | 10.04 | 1.12                                              | 1.16         | 1.43      | 1.48            |
| hsa-miR-100-4373160     | 24.01   | 24.98   | 23.99 | 22.97 | 16.99   | 16.02   | 17.01 | 18.03 | 1.13                                              | 1.00         | 1.06      | 0.94            |
| hsa-miR-362-5p-4378092  | 30.98   | 32.98   | 31.00 | 31.96 | 10.02   | 8.02    | 10.00 | 9.04  | 1.13                                              | 1.00         | 0.90      | 0.80            |
| hsa-let-7c-4373167      | 24.98   | 24.96   | 23.94 | 22.93 | 16.02   | 16.04   | 17.06 | 18.07 | 1.13                                              | 1.06         | 1.06      | 1.00            |
| hsa-miR-125a-5p-4395309 | 24.99   | 25.99   | 23.96 | 23.97 | 16.01   | 15.01   | 17.04 | 17.03 | 1.13                                              | 1.06         | 1.00      | 0.94            |
| hsa-miR-449b-4381011    | 31.98   | 34.01   | 31.97 | 32.99 | 9.02    | 6.99    | 9.03  | 8.01  | 1.15                                              | 1.00         | 0.89      | 0.78            |
| hsa-miR-128-4395327     | 25.99   | 26.97   | 24.96 | 24.90 | 15.01   | 14.03   | 16.04 | 16.10 | 1.15                                              | 1.07         | 1.00      | 0.93            |
| hsa-miR-140-5p-4373374  | 25.94   | 27.97   | 25.96 | 25.96 | 15.06   | 13.03   | 15.04 | 15.04 | 1.15                                              | 1.00         | 1.00      | 0.87            |
| hsa-miR-220b-4395317    | 30.94   | 30.94   | 30.97 | 29.25 | 10.06   | 10.06   | 10.03 | 11.75 | 1.17                                              | 1.00         | 1.17      | 1.00            |
| hsa-miR-193a-5p-4395392 | 28.97   | 29.98   | 28.98 | 27.97 | 12.03   | 11.02   | 12.02 | 13.03 | 1.18                                              | 1.00         | 1.08      | 0.92            |
| hsa-miR-106a-4395280    | 25.95   | 25.97   | 25.97 | 22.98 | 15.05   | 15.03   | 15.03 | 18.02 | 1.20                                              | 1.00         | 1.20      | 1.00            |
| hsa-miR-203-4373095     | 31.98   | 30.96   | 31.98 | 28.96 | 9.02    | 10.04   | 9.02  | 12.04 | 1.20                                              | 1.00         | 1.33      | 1.11            |
| hsa-let-7g-4395393      | 24.97   | 25.97   | 25.00 | 22.97 | 16.03   | 15.03   | 16.00 | 18.03 | 1.20                                              | 1.00         | 1.13      | 0.94            |
| hsa-miR-493-4395475     | 35.00   | 35.98   | 34.99 | 34.98 | 6.00    | 5.02    | 6.01  | 6.02  | 1.20                                              | 1.00         | 1.00      | 0.84            |
| hsa-let-7d-4395394      | 24.97   | 25.97   | 24.98 | 22.95 | 16.03   | 15.03   | 16.02 | 18.05 | 1.20                                              | 1.00         | 1.13      | 0.94            |
| hsa-miR-200c-4395411    | 29.96   | 30.98   | 30.01 | 28.95 | 11.04   | 10.02   | 11.00 | 12.05 | 1.20                                              | 1.00         | 1.10      | 0.91            |
| hsa-miR-214-4395417     | 32.00   | 31.01   | 31.98 | 28.98 | 9.00    | 9.99    | 9.02  | 12.02 | 1.20                                              | 1.00         | 1.33      | 1.11            |
| hsa-miR-200b-4395362    | 32.02   | 31.03   | 31.93 | 28.95 | 8.98    | 9.97    | 9.07  | 12.05 | 1.21                                              | 1.01         | 1.33      | 1.11            |
| hsa-miR-208-4373091     | 40.00   | 31.11   | 40.00 | 28.97 | 1.00    | 9.89    | 1.00  | 12.03 | 1.22                                              | 1.00         | 12.03     | 9.89            |
| hsa-miR-29b-4373288     | 31.00   | 31.99   | 30.98 | 30.01 | 10.00   | 9.01    | 10.02 | 10.99 | 1.22                                              | 1.00         | 1.10      | 0.90            |
| hsa-miR-133a-4395357    | 29.96   | 27.97   | 29.94 | 24.96 | 11.04   | 13.03   | 11.06 | 16.04 | 1.23                                              | 1.00         | 1.45      | 1.18            |
| hsa-miR-134-4373299     | 27.98   | 27.98   | 27.97 | 24.97 | 13.02   | 13.02   | 13.03 | 16.03 | 1.23                                              | 1.00         | 1.23      | 1.00            |
| hsa-miR-129-3p-4373297  | 25.96   | 27.98   | 27.00 | 24.94 | 15.04   | 13.02   | 14.00 | 16.06 | 1.23                                              | 0.93         | 1.15      | 0.87            |
| hsa-miR-143-4395360     | 28.98   | 28.99   | 28.97 | 25.97 | 12.02   | 12.01   | 12.03 | 15.03 | 1.25                                              | 1.00         | 1.25      | 1.00            |
| hsa-miR-185-4395382     | 30.99   | 29.98   | 29.97 | 26.99 | 10.01   | 11.02   | 11.03 | 14.01 | 1.27                                              | 1.10         | 1.27      | 1.10            |
| hsa-miR-381-4373020     | 34.96   | 33.95   | 31.95 | 32.01 | 6.04    | 7.05    | 9.05  | 8.99  | 1.27                                              | 1.50         | 0.99      | 1.17            |
| hsa-miR-103-4373158     | 26.99   | 26.97   | 25.96 | 22.98 | 14.01   | 14.03   | 15.04 | 18.02 | 1.28                                              | 1.07         | 1.20      | 1.00            |
| hsa-let-7f-4373164      | 25.99   | 26.98   | 25.97 | 22.96 | 15.01   | 14.02   | 15.03 | 18.04 | 1.29                                              | 1.00         | 1.20      | 0.93            |
| hsa-miR-19a-4373099     | 29.97   | 30.99   | 29.98 | 28.03 | 11.03   | 10.01   | 11.02 | 12.97 | 1.30                                              | 1.00         | 1.18      | 0.91            |
| hsa-miR-199a-3p-4395415 | 29.97   | 30.98   | 29.97 | 27.99 | 11.03   | 10.02   | 11.03 | 13.01 | 1.30                                              | 1.00         | 1.18      | 0.91            |
| hsa-miR-200a-4378069    | 29.00   | 31.74   | 40.00 | 28.94 | 12.00   | 9.26    | 1.00  | 12.06 | 1.30                                              | 0.08         | 12.06     | 0.77            |
| hsa-miR-137-4373301     | 35.95   | 28.98   | 40.00 | 24.98 | 5.05    | 12.02   | 1.00  | 16.02 | 1.33                                              | 0.20         | 16.02     | 2.38            |
| hsa-miR-140-3p-4395345  | 28.98   | 29.98   | 28.98 | 25.96 | 12.02   | 11.02   | 12.02 | 15.04 | 1.36                                              | 1.00         | 1.25      | 0.92            |
| hsa-miR-22-4373079      | 33.96   | 32.94   | 29.02 | 29.96 | 7.04    | 8.06    | 11.98 | 11.04 | 1.37                                              | 1.70         | 0.92      | 1.15            |
| hsa-miR-224-4395210     | 31.99   | 32.98   | 31.98 | 29.96 | 9.01    | 8.02    | 9.03  | 11.04 | 1.38                                              | 1.00         | 1.22      | 0.89            |
| hsa-miR-148a-4373130    | 32.96   | 30.98   | 31.97 | 26.95 | 8.04    | 10.02   | 9.03  | 14.05 | 1.40                                              | 1.12         | 1.56      | 1.25            |



Supplemental Table 1.

| MicroRNA ABI Assay ID   | Raw CT  |         |       |       | 41-CT   |         |       |       | Relative Quantification Ratio = (41-CT) / (41-CT) |              |           |                 |
|-------------------------|---------|---------|-------|-------|---------|---------|-------|-------|---------------------------------------------------|--------------|-----------|-----------------|
|                         | CntrlCB | CntrlHP | ADCB  | ADHP  | CntrlCB | CntrlHP | ADCB  | ADHP  | ADHP/CntrlHP                                      | ADCB/CntrlCB | ADHP/ADCB | CntrlHP/CntrlCB |
| hsa-miR-124-4373295     | 26.99   | 28.99   | 27.01 | 23.96 | 14.01   | 12.01   | 13.99 | 17.04 | 1.42                                              | 1.00         | 1.22      | 0.86            |
| hsa-miR-194-4373106     | 27.97   | 31.97   | 27.95 | 27.98 | 13.03   | 9.03    | 13.05 | 13.02 | 1.44                                              | 1.00         | 1.00      | 0.69            |
| hsa-miR-192-4373108     | 26.97   | 31.97   | 26.98 | 27.97 | 14.03   | 9.03    | 14.02 | 13.03 | 1.44                                              | 1.00         | 0.93      | 0.64            |
| hsa-miR-187-4373307     | 32.02   | 31.98   | 30.97 | 27.93 | 8.98    | 9.02    | 10.03 | 13.07 | 1.45                                              | 1.12         | 1.30      | 1.00            |
| hsa-miR-129-5p-4373171  | 30.00   | 30.01   | 30.98 | 24.96 | 11.00   | 10.99   | 10.02 | 16.04 | 1.46                                              | 0.91         | 1.60      | 1.00            |
| hsa-let-7a-4373169      | 23.99   | 25.02   | 23.99 | 17.33 | 17.01   | 15.98   | 17.01 | 23.67 | 1.48                                              | 1.00         | 1.39      | 0.94            |
| hsa-miR-202-4395474     | 34.10   | 32.93   | 31.81 | 28.96 | 6.90    | 8.08    | 9.19  | 12.04 | 1.49                                              | 1.33         | 1.31      | 1.17            |
| hsa-miR-215-4373084     | 27.95   | 33.01   | 28.89 | 28.98 | 13.05   | 7.99    | 12.11 | 12.02 | 1.50                                              | 0.93         | 0.99      | 0.61            |
| hsa-miR-148b-4373129    | 30.99   | 32.00   | 29.97 | 26.95 | 10.01   | 9.00    | 11.03 | 14.05 | 1.56                                              | 1.10         | 1.27      | 0.90            |
| hsa-miR-133b-4395358    | 32.00   | 30.93   | 32.02 | 24.97 | 9.00    | 10.07   | 8.98  | 16.03 | 1.59                                              | 1.00         | 1.78      | 1.12            |
| hsa-miR-449a-4373207    | 32.97   | 35.97   | 32.99 | 32.99 | 8.03    | 5.03    | 8.01  | 8.01  | 1.59                                              | 1.00         | 1.00      | 0.63            |
| hsa-miR-135a-4373140    | 28.97   | 30.97   | 28.99 | 24.98 | 12.03   | 10.03   | 12.01 | 16.02 | 1.60                                              | 1.00         | 1.33      | 0.83            |
| hsa-miR-429-4373203     | 40.00   | 35.99   | 40.00 | 32.97 | 1.00    | 5.01    | 1.00  | 8.03  | 1.60                                              | 1.00         | 8.03      | 5.01            |
| hsa-miR-448-4373206     | 40.00   | 35.99   | 40.00 | 32.98 | 1.00    | 5.01    | 1.00  | 8.02  | 1.60                                              | 1.00         | 8.02      | 5.01            |
| hsa-miR-130a-4373145    | 29.00   | 30.99   | 27.98 | 24.96 | 12.00   | 10.01   | 13.02 | 16.04 | 1.60                                              | 1.08         | 1.23      | 0.83            |
| hsa-miR-106b-4373155    | 27.96   | 29.97   | 27.97 | 22.98 | 13.04   | 11.03   | 13.03 | 18.02 | 1.63                                              | 1.00         | 1.38      | 0.85            |
| hsa-miR-155-4395459     | 40.00   | 19.11   | 34.90 | 4.59  | 1.00    | 21.89   | 6.10  | 36.41 | 1.66                                              | 6.10         | 5.97      | 21.89           |
| hsa-miR-142-3p-4373136  | 30.95   | 31.99   | 32.97 | 25.97 | 10.05   | 9.01    | 8.03  | 15.03 | 1.67                                              | 0.80         | 1.87      | 0.90            |
| hsa-miR-154-4373270     | 32.01   | 33.03   | 33.00 | 26.97 | 8.99    | 7.97    | 8.00  | 14.03 | 1.76                                              | 0.89         | 1.75      | 0.89            |
| hsa-miR-130b-4373144    | 29.98   | 31.97   | 29.00 | 24.96 | 11.02   | 9.03    | 12.00 | 16.04 | 1.78                                              | 1.09         | 1.34      | 0.82            |
| hsa-miR-377-4373025     | 40.00   | 35.98   | 40.00 | 32.00 | 1.00    | 5.02    | 1.00  | 9.00  | 1.79                                              | 1.00         | 9.00      | 5.02            |
| hsa-miR-105-4395278     | 32.98   | 30.97   | 31.98 | 22.98 | 8.02    | 10.03   | 9.02  | 18.02 | 1.80                                              | 1.12         | 2.00      | 1.25            |
| hsa-miR-10a-4373153     | 31.06   | 30.99   | 30.99 | 22.98 | 9.94    | 10.01   | 10.01 | 18.02 | 1.80                                              | 1.01         | 1.80      | 1.01            |
| hsa-miR-302b-4378071    | 34.95   | 34.94   | 33.99 | 30.03 | 6.05    | 6.06    | 7.01  | 10.97 | 1.81                                              | 1.16         | 1.57      | 1.00            |
| hsa-miR-196b-4395326    | 36.02   | 33.97   | 34.98 | 27.98 | 4.98    | 7.03    | 6.02  | 13.02 | 1.85                                              | 1.21         | 2.16      | 1.41            |
| hsa-miR-190-4373110     | 31.95   | 33.98   | 32.97 | 27.96 | 9.05    | 7.02    | 8.03  | 13.04 | 1.86                                              | 0.89         | 1.62      | 0.78            |
| hsa-miR-146b-3p-4395472 | 36.02   | 32.97   | 34.98 | 26.00 | 4.98    | 8.03    | 6.02  | 15.00 | 1.87                                              | 1.21         | 2.49      | 1.61            |
| hsa-miR-18a-4395533     | 31.00   | 34.02   | 32.01 | 27.96 | 10.00   | 6.98    | 8.99  | 13.04 | 1.87                                              | 0.90         | 1.45      | 0.70            |
| hsa-miR-107-4373154     | 29.99   | 31.94   | 29.99 | 22.98 | 11.01   | 9.07    | 11.01 | 18.02 | 1.99                                              | 1.00         | 1.64      | 0.82            |
| hsa-miR-101-4395364     | 30.97   | 31.95   | 30.98 | 22.98 | 10.03   | 9.05    | 10.02 | 18.02 | 1.99                                              | 1.00         | 1.80      | 0.90            |
| hsa-miR-135b-4395372    | 24.96   | 32.98   | 24.96 | 24.98 | 16.04   | 8.02    | 16.04 | 16.02 | 2.00                                              | 1.00         | 1.00      | 0.50            |
| hsa-miR-125a-3p-4395310 | 31.96   | 32.97   | 30.97 | 23.96 | 9.04    | 8.03    | 10.03 | 17.04 | 2.12                                              | 1.11         | 1.70      | 0.89            |
| hsa-miR-1-4395333       | 35.99   | 35.00   | 35.98 | 25.98 | 5.01    | 6.00    | 5.02  | 15.02 | 2.50                                              | 1.00         | 2.99      | 1.20            |

Supplemental Table 1.

| MicroRNA ABI Assay ID   | Raw CT  |         |       |       | 41-CT   |         |       |       | Relative Quantification Ratio = (41-CT) / (41-CT) |              |           |                 |
|-------------------------|---------|---------|-------|-------|---------|---------|-------|-------|---------------------------------------------------|--------------|-----------|-----------------|
|                         | CntrlCB | CntrlHP | ADCB  | ADHP  | CntrlCB | CntrlHP | ADCB  | ADHP  | ADHP/CntrlHP                                      | ADCB/CntrlCB | ADHP/ADCB | CntrlHP/CntrlCB |
| hsa-miR-183-4395380     | 40.00   | 35.95   | 36.25 | 26.99 | 1.00    | 5.05    | 4.75  | 14.01 | 2.78                                              | 4.75         | 2.95      | 5.05            |
| hsa-miR-182-4395445     | 40.00   | 35.95   | 40.00 | 26.99 | 1.00    | 5.05    | 1.00  | 14.01 | 2.78                                              | 1.00         | 14.01     | 5.05            |
| hsa-miR-193a-3p-4395361 | 40.00   | 36.87   | 40.00 | 27.97 | 1.00    | 4.13    | 1.00  | 13.03 | 3.15                                              | 1.00         | 13.03     | 4.13            |
| hsa-miR-136-4373173     | 36.95   | 36.00   | 35.14 | 24.98 | 4.05    | 5.00    | 5.86  | 16.02 | 3.20                                              | 1.45         | 2.73      | 1.23            |
| hsa-miR-153-4373305     | 35.98   | 37.03   | 40.00 | 26.97 | 5.02    | 3.97    | 1.00  | 14.03 | 3.54                                              | 0.20         | 14.03     | 0.79            |
| hsa-miR-508-5p-4395203  | 40.00   | 40.00   | 40.00 | 37.38 | 1.00    | 1.00    | 1.00  | 3.62  | 3.62                                              | 1.00         | 3.62      | 1.00            |
| hsa-miR-508-3p-4373233  | 36.00   | 40.00   | 40.00 | 36.96 | 5.00    | 1.00    | 1.00  | 4.04  | 4.04                                              | 0.20         | 4.04      | 0.20            |
| hsa-miR-507-4373232     | 40.00   | 40.00   | 37.28 | 36.20 | 1.00    | 1.00    | 3.72  | 4.80  | 4.80                                              | 3.72         | 1.29      | 1.00            |
| hsa-miR-506-4373231     | 40.00   | 40.00   | 40.00 | 36.09 | 1.00    | 1.00    | 1.00  | 4.91  | 4.91                                              | 1.00         | 4.91      | 1.00            |
| hsa-miR-503-4373228     | 40.00   | 40.00   | 40.00 | 36.02 | 1.00    | 1.00    | 1.00  | 4.98  | 4.98                                              | 1.00         | 4.98      | 1.00            |
| hsa-miR-501-3p-4395546  | 30.80   | 40.00   | 40.00 | 35.99 | 10.20   | 1.00    | 1.00  | 5.01  | 5.01                                              | 0.10         | 5.01      | 0.10            |
| hsa-miR-499-3p-4395538  | 40.00   | 40.00   | 40.00 | 35.97 | 1.00    | 1.00    | 1.00  | 5.03  | 5.03                                              | 1.00         | 5.03      | 1.00            |
| hsa-miR-492-4373217     | 40.00   | 40.00   | 40.00 | 34.98 | 1.00    | 1.00    | 1.00  | 6.02  | 6.02                                              | 1.00         | 6.02      | 1.00            |
| hsa-miR-491-3p-4395471  | 40.00   | 40.00   | 34.00 | 34.87 | 1.00    | 1.00    | 7.00  | 6.13  | 6.13                                              | 7.00         | 0.88      | 1.00            |
| hsa-miR-486-3p-4395204  | 29.98   | 40.00   | 29.94 | 34.04 | 11.02   | 1.00    | 11.06 | 6.96  | 6.96                                              | 1.00         | 0.63      | 0.09            |
| hsa-miR-453-4395429     | 40.00   | 40.00   | 40.00 | 33.99 | 1.00    | 1.00    | 1.00  | 7.01  | 7.01                                              | 1.00         | 7.01      | 1.00            |
| hsa-miR-450b-3p-4395319 | 40.00   | 40.00   | 40.00 | 33.86 | 1.00    | 1.00    | 1.00  | 7.14  | 7.14                                              | 1.00         | 7.14      | 1.00            |
| hsa-miR-450a-4395414    | 40.00   | 40.00   | 40.00 | 33.00 | 1.00    | 1.00    | 1.00  | 8.00  | 8.00                                              | 1.00         | 8.00      | 1.00            |
| hsa-miR-431-4395173     | 36.00   | 40.00   | 33.34 | 32.98 | 5.00    | 1.00    | 7.67  | 8.02  | 8.02                                              | 1.53         | 1.05      | 0.20            |
| hsa-miR-424-4373201     | 40.00   | 40.00   | 40.00 | 32.96 | 1.00    | 1.00    | 1.00  | 8.04  | 8.04                                              | 1.00         | 8.04      | 1.00            |
| hsa-miR-412-4373199     | 36.04   | 40.00   | 40.00 | 32.96 | 4.96    | 1.00    | 1.00  | 8.04  | 8.04                                              | 0.20         | 8.04      | 0.20            |
| hsa-miR-384-4373017     | 40.00   | 40.00   | 40.00 | 32.07 | 1.00    | 1.00    | 1.00  | 8.93  | 8.93                                              | 1.00         | 8.93      | 1.00            |
| hsa-miR-380-4373022     | 30.20   | 40.00   | 30.85 | 32.01 | 10.80   | 1.00    | 10.15 | 8.99  | 8.99                                              | 0.94         | 0.89      | 0.09            |
| hsa-miR-376b-4373196    | 40.00   | 40.00   | 40.00 | 32.00 | 1.00    | 1.00    | 1.00  | 9.00  | 9.00                                              | 1.00         | 9.00      | 1.00            |
| hsa-miR-373-4378073     | 40.00   | 40.00   | 40.00 | 31.99 | 1.00    | 1.00    | 1.00  | 9.01  | 9.01                                              | 1.00         | 9.01      | 1.00            |
| hsa-miR-372-4373029     | 35.97   | 40.00   | 35.96 | 31.98 | 5.03    | 1.00    | 5.04  | 9.02  | 9.02                                              | 1.00         | 1.79      | 0.20            |
| hsa-miR-371-3p-4395235  | 40.00   | 40.00   | 40.00 | 31.98 | 1.00    | 1.00    | 1.00  | 9.02  | 9.02                                              | 1.00         | 9.02      | 1.00            |
| hsa-miR-369-5p-4373195  | 35.98   | 40.00   | 34.98 | 31.97 | 5.02    | 1.00    | 6.02  | 9.03  | 9.03                                              | 1.20         | 1.50      | 0.20            |
| hsa-miR-369-3p-4373032  | 34.97   | 40.00   | 35.97 | 31.97 | 6.03    | 1.00    | 5.03  | 9.03  | 9.03                                              | 0.84         | 1.79      | 0.17            |
| hsa-miR-367-4373034     | 40.00   | 40.00   | 32.95 | 31.97 | 1.00    | 1.00    | 8.05  | 9.03  | 9.03                                              | 8.05         | 1.12      | 1.00            |
| hsa-miR-362-3p-4395228  | 33.95   | 40.00   | 34.98 | 31.96 | 7.05    | 1.00    | 6.02  | 9.04  | 9.04                                              | 0.85         | 1.50      | 0.14            |
| hsa-miR-33b-4395196     | 40.00   | 40.00   | 24.87 | 30.99 | 1.00    | 1.00    | 16.13 | 10.01 | 10.01                                             | 16.13        | 0.62      | 1.00            |
| hsa-miR-32-4395220      | 40.00   | 40.00   | 40.00 | 30.95 | 1.00    | 1.00    | 1.00  | 10.05 | 10.05                                             | 1.00         | 10.05     | 1.00            |

Supplemental Table 1.

| MicroRNA ABI Assay ID    | Raw CT  |         |       |       | 41-CT   |         |       |       | Relative Quantification Ratio = (41-CT) / (41-CT) |              |           |                 |
|--------------------------|---------|---------|-------|-------|---------|---------|-------|-------|---------------------------------------------------|--------------|-----------|-----------------|
|                          | CntrlCB | CntrlHP | ADCB  | ADHP  | CntrlCB | CntrlHP | ADCB  | ADHP  | ADHP/CntrlHP                                      | ADCB/CntrlCB | ADHP/ADCB | CntrlHP/CntrlCB |
| hsa-miR-302c-4378072     | 40.00   | 40.00   | 35.96 | 30.05 | 1.00    | 1.00    | 5.04  | 10.95 | 10.95                                             | 5.04         | 2.17      | 1.00            |
| hsa-miR-302a-4378070     | 33.96   | 40.00   | 33.96 | 30.02 | 7.04    | 1.00    | 7.04  | 10.98 | 10.98                                             | 1.00         | 1.56      | 0.14            |
| hsa-miR-301b-4395503     | 33.97   | 40.00   | 33.99 | 30.02 | 7.03    | 1.00    | 7.01  | 10.98 | 10.98                                             | 1.00         | 1.57      | 0.14            |
| hsa-miR-299-3p-4373189   | 29.60   | 40.00   | 35.99 | 29.99 | 11.40   | 1.00    | 5.01  | 11.01 | 11.01                                             | 0.44         | 2.20      | 0.09            |
| hsa-miR-298-4395301      | 40.00   | 40.00   | 40.00 | 29.99 | 1.00    | 1.00    | 1.00  | 11.01 | 11.01                                             | 1.00         | 11.01     | 1.00            |
| hsa-miR-296-3p-4395212   | 40.00   | 40.00   | 40.00 | 29.98 | 1.00    | 1.00    | 1.00  | 11.02 | 11.02                                             | 1.00         | 11.02     | 1.00            |
| hsa-miR-220c-4395322     | 40.00   | 40.00   | 40.00 | 29.70 | 1.00    | 1.00    | 1.00  | 11.30 | 11.30                                             | 1.00         | 11.30     | 1.00            |
| hsa-miR-220-4373078      | 40.00   | 40.00   | 40.00 | 29.04 | 1.00    | 1.00    | 1.00  | 11.96 | 11.96                                             | 1.00         | 11.96     | 1.00            |
| hsa-miR-219-1-3p-4395206 | 40.00   | 40.00   | 40.00 | 29.01 | 1.00    | 1.00    | 1.00  | 11.99 | 11.99                                             | 1.00         | 11.99     | 1.00            |
| hsa-miR-217-4395448      | 40.00   | 40.00   | 40.00 | 28.99 | 1.00    | 1.00    | 1.00  | 12.01 | 12.01                                             | 1.00         | 12.01     | 1.00            |
| hsa-miR-216b-4395437     | 40.00   | 40.00   | 24.62 | 28.99 | 1.00    | 1.00    | 16.38 | 12.01 | 12.01                                             | 16.38        | 0.73      | 1.00            |
| hsa-miR-216a-4395331     | 40.00   | 40.00   | 40.00 | 28.99 | 1.00    | 1.00    | 1.00  | 12.01 | 12.01                                             | 1.00         | 12.01     | 1.00            |
| hsa-miR-205-4373093      | 40.00   | 40.00   | 23.51 | 28.97 | 1.00    | 1.00    | 17.49 | 12.03 | 12.03                                             | 17.49        | 0.69      | 1.00            |
| hsa-miR-199b-5p-4373100  | 40.00   | 40.00   | 40.00 | 28.02 | 1.00    | 1.00    | 1.00  | 12.98 | 12.98                                             | 1.00         | 12.98     | 1.00            |
| hsa-miR-199a-5p-4373272  | 40.00   | 40.00   | 40.00 | 27.99 | 1.00    | 1.00    | 1.00  | 13.01 | 13.01                                             | 1.00         | 13.01     | 1.00            |
| hsa-miR-198-4395384      | 40.00   | 40.00   | 40.00 | 27.98 | 1.00    | 1.00    | 1.00  | 13.02 | 13.02                                             | 1.00         | 13.02     | 1.00            |
| hsa-miR-18b-4395328      | 40.00   | 40.00   | 40.00 | 27.96 | 1.00    | 1.00    | 1.00  | 13.04 | 13.04                                             | 1.00         | 13.04     | 1.00            |
| hsa-miR-188-3p-4395217   | 35.92   | 40.00   | 40.00 | 27.95 | 5.08    | 1.00    | 1.00  | 13.05 | 13.05                                             | 0.20         | 13.05     | 0.20            |
| hsa-miR-147b-4395373     | 40.00   | 40.00   | 22.38 | 26.94 | 1.00    | 1.00    | 18.62 | 14.06 | 14.06                                             | 18.62        | 0.76      | 1.00            |
| hsa-miR-147-4373131      | 35.98   | 40.00   | 40.00 | 26.26 | 5.02    | 1.00    | 1.00  | 14.74 | 14.74                                             | 0.20         | 14.74     | 0.20            |
| hsa-miR-142-5p-4395359   | 40.00   | 40.00   | 34.05 | 25.97 | 1.00    | 1.00    | 6.96  | 15.03 | 15.03                                             | 6.96         | 2.16      | 1.00            |
| hsa-miR-141-4373137      | 35.99   | 40.00   | 36.00 | 25.97 | 5.01    | 1.00    | 5.00  | 15.03 | 15.03                                             | 1.00         | 3.01      | 0.20            |
| hsa-miR-127-5p-4395340   | 40.00   | 40.00   | 26.46 | 24.01 | 1.00    | 1.00    | 14.54 | 16.99 | 16.99                                             | 14.54        | 1.17      | 1.00            |
| hsa-miR-122-4395356      | 33.86   | 40.00   | 33.99 | 23.95 | 7.14    | 1.00    | 7.01  | 17.05 | 17.05                                             | 0.98         | 2.43      | 0.14            |
| hsa-miR-10b-4395329      | 36.00   | 40.00   | 35.97 | 23.95 | 5.00    | 1.00    | 5.03  | 17.05 | 17.05                                             | 1.01         | 3.39      | 0.20            |

Supplemental Table 1.

| MicroRNA ABI Assay ID         | $\Delta\text{CT} = (\text{Raw CT miRNA}) - (\text{Raw CT mean endogenous controls})$ |                                    |                                 |                                 | $\Delta\Delta\text{CT} = \Delta\text{CT}_{\text{brain region 1}} - \Delta\text{CT}_{\text{brain region 2}}$ |                                              |                                           |
|-------------------------------|--------------------------------------------------------------------------------------|------------------------------------|---------------------------------|---------------------------------|-------------------------------------------------------------------------------------------------------------|----------------------------------------------|-------------------------------------------|
|                               | $\Delta\text{CT}_{\text{CntrlCB}}$                                                   | $\Delta\text{CT}_{\text{CntrlHP}}$ | $\Delta\text{CT}_{\text{ADCB}}$ | $\Delta\text{CT}_{\text{ADHP}}$ | $\Delta\Delta\text{CT}[\text{ADHP-CntrlHP}]$                                                                | $\Delta\Delta\text{CT}[\text{ADCB-CntrlCB}]$ | $\Delta\Delta\text{CT}[\text{ADHP-ADCB}]$ |
| <b>MammU6-4395470</b>         |                                                                                      |                                    |                                 |                                 |                                                                                                             |                                              |                                           |
| <b>RNU44-4373384</b>          |                                                                                      |                                    |                                 |                                 |                                                                                                             |                                              |                                           |
| <b>RNU48-4373383</b>          |                                                                                      |                                    |                                 |                                 |                                                                                                             |                                              |                                           |
| <b>MeanEndogenousControls</b> |                                                                                      |                                    |                                 |                                 |                                                                                                             |                                              |                                           |
| ath-miR159a-4373390           |                                                                                      |                                    |                                 |                                 |                                                                                                             |                                              |                                           |
| hsa-miR-98-4373009            | 26.02                                                                                | 26.04                              | 25.94                           | 40.00                           | 13.96                                                                                                       | -0.08                                        | 14.06                                     |
| hsa-miR-501-5p-4373226        | 26.74                                                                                | 27.04                              | 24.99                           | 36.00                           | 8.96                                                                                                        | -1.76                                        | 11.01                                     |
| hsa-miR-342-3p-4395371        | 21.98                                                                                | 22.98                              | 20.96                           | 31.00                           | 8.02                                                                                                        | -1.03                                        | 10.04                                     |
| hsa-miR-331-3p-4373046        | 21.98                                                                                | 22.97                              | 21.97                           | 30.97                           | 8.00                                                                                                        | -0.01                                        | 9.01                                      |
| hsa-miR-328-4373049           | 22.97                                                                                | 22.99                              | 23.99                           | 30.96                           | 7.97                                                                                                        | 1.02                                         | 6.97                                      |
| hsa-miR-370-4395386           | 26.00                                                                                | 25.99                              | 26.99                           | 31.98                           | 5.99                                                                                                        | 0.99                                         | 4.99                                      |
| hsa-miR-204-4373094           | 20.97                                                                                | 21.93                              | 20.97                           | 28.97                           | 7.03                                                                                                        | 0.00                                         | 7.99                                      |
| hsa-miR-211-4373088           | 22.13                                                                                | 22.11                              | 40.00                           | 28.98                           | 6.87                                                                                                        | 17.87                                        | -11.02                                    |
| hsa-miR-330-3p-4373047        | 28.02                                                                                | 26.93                              | 26.95                           | 30.97                           | 4.04                                                                                                        | -1.07                                        | 4.02                                      |
| hsa-miR-191-4395410           | 22.97                                                                                | 22.97                              | 22.99                           | 27.97                           | 4.99                                                                                                        | 0.02                                         | 4.97                                      |
| hsa-miR-346-4373038           | 28.08                                                                                | 28.00                              | 26.12                           | 31.01                           | 3.01                                                                                                        | -1.97                                        | 4.89                                      |
| hsa-miR-149-4395366           | 22.97                                                                                | 23.00                              | 22.97                           | 26.96                           | 3.96                                                                                                        | 0.00                                         | 3.99                                      |
| hsa-miR-139-5p-4395400        | 25.98                                                                                | 21.97                              | 25.98                           | 25.96                           | 3.99                                                                                                        | 0.00                                         | -0.02                                     |
| hsa-miR-208b-4395401          | 40.00                                                                                | 25.91                              | 24.22                           | 28.98                           | 3.07                                                                                                        | -15.78                                       | 4.75                                      |
| hsa-miR-138-4395395           | 24.97                                                                                | 21.94                              | 24.97                           | 24.99                           | 3.05                                                                                                        | 0.00                                         | 0.02                                      |
| hsa-miR-132-4373143           | 24.98                                                                                | 22.95                              | 24.95                           | 24.96                           | 2.01                                                                                                        | -0.02                                        | 0.01                                      |
| hsa-miR-184-4373113           | 29.96                                                                                | 25.95                              | 28.94                           | 26.99                           | 1.04                                                                                                        | -1.02                                        | -1.95                                     |
| hsa-miR-126-4395339           | 22.97                                                                                | 22.97                              | 22.98                           | 23.98                           | 1.01                                                                                                        | 0.00                                         | 1.00                                      |
| hsa-miR-181c-4373115          | 28.95                                                                                | 29.99                              | 29.99                           | 26.98                           | -3.01                                                                                                       | 1.04                                         | -3.01                                     |
| hsa-miR-152-4395170           | 29.97                                                                                | 29.97                              | 28.96                           | 26.96                           | -3.01                                                                                                       | -1.02                                        | -2.00                                     |
| hsa-miR-15a-4373123           | 28.97                                                                                | 33.04                              | 29.01                           | 26.97                           | -6.07                                                                                                       | 0.03                                         | -2.04                                     |
| hsa-miR-9-4373285             | 18.95                                                                                | 20.96                              | 18.97                           | 40.00                           | 19.04                                                                                                       | 0.02                                         | 21.03                                     |
| hsa-miR-99a-4373008           | 23.99                                                                                | 23.98                              | 23.99                           | 40.00                           | 16.02                                                                                                       | 0.01                                         | 16.01                                     |
| hsa-miR-99b-4373007           | 24.00                                                                                | 23.99                              | 22.98                           | 40.00                           | 16.01                                                                                                       | -1.03                                        | 17.02                                     |
| hsa-miR-885-5p-4395407        | 22.99                                                                                | 24.98                              | 22.96                           | 40.00                           | 15.02                                                                                                       | -0.03                                        | 17.04                                     |
| hsa-miR-539-4378103           | 25.96                                                                                | 25.94                              | 25.97                           | 40.00                           | 14.06                                                                                                       | 0.02                                         | 14.03                                     |
| hsa-miR-886-3p-4395305        | 28.00                                                                                | 25.96                              | 27.97                           | 40.00                           | 14.04                                                                                                       | -0.03                                        | 12.03                                     |
| hsa-miR-574-3p-4395460        | 27.99                                                                                | 25.99                              | 26.93                           | 40.00                           | 14.01                                                                                                       | -1.06                                        | 13.07                                     |
| hsa-miR-744-4395435           | 27.95                                                                                | 26.97                              | 27.97                           | 40.00                           | 13.03                                                                                                       | 0.01                                         | 12.03                                     |
| hsa-miR-95-4373011            | 25.96                                                                                | 26.97                              | 25.97                           | 40.00                           | 13.03                                                                                                       | 0.01                                         | 14.03                                     |
| hsa-miR-92a-4395169           | 27.99                                                                                | 26.98                              | 27.98                           | 40.00                           | 13.02                                                                                                       | -0.02                                        | 12.02                                     |
| hsa-miR-708-4395452           | 29.96                                                                                | 27.95                              | 28.94                           | 40.00                           | 12.05                                                                                                       | -1.02                                        | 11.06                                     |
| hsa-miR-874-4395379           | 26.98                                                                                | 27.95                              | 25.95                           | 40.00                           | 12.05                                                                                                       | -1.03                                        | 14.05                                     |
| hsa-miR-886-5p-4395304        | 29.97                                                                                | 27.96                              | 29.99                           | 40.00                           | 12.04                                                                                                       | 0.03                                         | 10.01                                     |

Supplemental Table 1.

| MicroRNA ABI Assay ID   | $\Delta CT = (\text{Raw CT miRNA}) - (\text{Raw CT mean endogenous controls})$ |                              |                             |                           | $\Delta\Delta CT = \Delta CT_{\text{brain region 1}} - \Delta CT_{\text{brain region 2}}$ |                                         |                                      |
|-------------------------|--------------------------------------------------------------------------------|------------------------------|-----------------------------|---------------------------|-------------------------------------------------------------------------------------------|-----------------------------------------|--------------------------------------|
|                         | $\Delta CT_{\text{CntrlCB}}$                                                   | $\Delta CT_{\text{CntrlHP}}$ | $\Delta CT_{\text{ADCBCB}}$ | $\Delta CT_{\text{ADHP}}$ | $\Delta\Delta CT[\text{ADHP-CntrlHP}]$                                                    | $\Delta\Delta CT[\text{ADCBC-CntrlCB}]$ | $\Delta\Delta CT[\text{ADHP-ADCBC}]$ |
| hsa-miR-93-4373302      | 28.98                                                                          | 27.97                        | 27.96                       | 40.00                     | 12.03                                                                                     | -1.02                                   | 12.04                                |
| hsa-miR-532-3p-4395466  | 26.99                                                                          | 27.98                        | 26.97                       | 40.00                     | 12.02                                                                                     | -0.02                                   | 13.03                                |
| hsa-miR-548d-3p-4381008 | 40.00                                                                          | 28.73                        | 40.00                       | 40.00                     | 11.27                                                                                     | 0.00                                    | 0.00                                 |
| hsa-miR-576-5p-4395461  | 32.93                                                                          | 28.80                        | 40.00                       | 40.00                     | 11.20                                                                                     | 7.07                                    | 0.00                                 |
| hsa-miR-887-4395485     | 28.95                                                                          | 28.80                        | 40.00                       | 40.00                     | 11.20                                                                                     | 11.05                                   | 0.00                                 |
| hsa-miR-628-5p-4395544  | 27.92                                                                          | 28.93                        | 28.94                       | 40.00                     | 11.07                                                                                     | 1.02                                    | 11.06                                |
| hsa-miR-598-4395179     | 27.98                                                                          | 28.96                        | 27.98                       | 40.00                     | 11.04                                                                                     | 0.01                                    | 12.02                                |
| hsa-miR-532-5p-4380928  | 26.98                                                                          | 29.00                        | 26.98                       | 40.00                     | 11.00                                                                                     | 0.00                                    | 13.02                                |
| hsa-miR-655-4381015     | 28.96                                                                          | 29.97                        | 28.97                       | 40.00                     | 10.03                                                                                     | 0.01                                    | 11.03                                |
| hsa-miR-660-4380925     | 27.97                                                                          | 29.97                        | 27.95                       | 40.00                     | 10.03                                                                                     | -0.02                                   | 12.05                                |
| hsa-miR-671-3p-4395433  | 29.97                                                                          | 29.98                        | 30.98                       | 40.00                     | 10.02                                                                                     | 1.01                                    | 9.02                                 |
| hsa-miR-652-4395463     | 29.96                                                                          | 30.00                        | 29.99                       | 40.00                     | 10.00                                                                                     | 0.03                                    | 10.01                                |
| hsa-miR-616-4395525     | 34.04                                                                          | 31.14                        | 40.00                       | 40.00                     | 8.86                                                                                      | 5.96                                    | 0.00                                 |
| hsa-miR-590-5p-4395176  | 29.96                                                                          | 31.97                        | 29.97                       | 40.00                     | 8.03                                                                                      | 0.01                                    | 10.03                                |
| hsa-miR-625-4395542     | 30.01                                                                          | 31.98                        | 30.00                       | 40.00                     | 8.02                                                                                      | -0.01                                   | 10.00                                |
| hsa-miR-642-4380995     | 33.97                                                                          | 31.99                        | 32.99                       | 40.00                     | 8.01                                                                                      | -0.98                                   | 7.01                                 |
| hsa-miR-541-4395312     | 33.97                                                                          | 31.99                        | 34.00                       | 40.00                     | 8.01                                                                                      | 0.03                                    | 6.00                                 |
| hsa-miR-758-4395180     | 31.99                                                                          | 32.01                        | 30.98                       | 40.00                     | 7.99                                                                                      | -1.02                                   | 9.02                                 |
| hsa-miR-519d-4395514    | 34.78                                                                          | 32.89                        | 33.96                       | 40.00                     | 7.11                                                                                      | -0.82                                   | 6.04                                 |
| hsa-miR-891a-4395302    | 32.00                                                                          | 32.99                        | 31.98                       | 40.00                     | 7.01                                                                                      | -0.02                                   | 8.02                                 |
| hsa-miR-889-4395313     | 30.98                                                                          | 33.00                        | 30.98                       | 40.00                     | 7.00                                                                                      | 0.00                                    | 9.02                                 |
| hsa-miR-636-4395199     | 33.98                                                                          | 33.02                        | 34.00                       | 40.00                     | 6.98                                                                                      | 0.02                                    | 6.00                                 |
| hsa-miR-518d-3p-4373248 | 33.98                                                                          | 33.04                        | 40.00                       | 40.00                     | 6.96                                                                                      | 6.02                                    | 0.00                                 |
| hsa-miR-512-3p-4381034  | 40.00                                                                          | 33.08                        | 35.98                       | 40.00                     | 6.92                                                                                      | -4.02                                   | 4.02                                 |
| hsa-miR-582-3p-4395510  | 33.13                                                                          | 33.74                        | 35.09                       | 40.00                     | 6.26                                                                                      | 1.96                                    | 4.91                                 |
| hsa-miR-519a-4395526    | 36.04                                                                          | 33.93                        | 33.98                       | 40.00                     | 6.07                                                                                      | -2.05                                   | 6.02                                 |
| hsa-miR-548d-5p-4395348 | 34.96                                                                          | 33.95                        | 34.98                       | 40.00                     | 6.05                                                                                      | 0.02                                    | 5.02                                 |
| hsa-miR-548b-5p-4395519 | 40.00                                                                          | 33.97                        | 35.95                       | 40.00                     | 6.03                                                                                      | -4.05                                   | 4.05                                 |
| hsa-miR-511-4373236     | 40.00                                                                          | 33.97                        | 40.00                       | 40.00                     | 6.03                                                                                      | 0.00                                    | 0.00                                 |
| hsa-miR-597-4380960     | 32.97                                                                          | 33.99                        | 32.96                       | 40.00                     | 6.01                                                                                      | -0.01                                   | 7.04                                 |
| hsa-miR-522-4395524     | 34.98                                                                          | 34.00                        | 40.00                       | 40.00                     | 6.00                                                                                      | 5.02                                    | 0.00                                 |
| hsa-miR-654-5p-4381014  | 33.03                                                                          | 34.02                        | 33.87                       | 40.00                     | 5.98                                                                                      | 0.84                                    | 6.13                                 |
| hsa-miR-518d-5p-4395500 | 40.00                                                                          | 34.36                        | 40.00                       | 40.00                     | 5.64                                                                                      | 0.00                                    | 0.00                                 |
| hsa-miR-518e-4395506    | 34.08                                                                          | 34.79                        | 33.80                       | 40.00                     | 5.21                                                                                      | -0.28                                   | 6.20                                 |
| hsa-miR-517c-4373264    | 35.02                                                                          | 34.96                        | 34.00                       | 40.00                     | 5.04                                                                                      | -1.02                                   | 6.00                                 |
| hsa-miR-542-3p-4378101  | 40.00                                                                          | 34.96                        | 35.17                       | 40.00                     | 5.04                                                                                      | -4.84                                   | 4.84                                 |
| hsa-miR-876-3p-4395336  | 40.00                                                                          | 34.98                        | 40.00                       | 40.00                     | 5.02                                                                                      | 0.00                                    | 0.00                                 |
| hsa-miR-548c-5p-4395540 | 35.97                                                                          | 34.98                        | 40.00                       | 40.00                     | 5.02                                                                                      | 4.03                                    | 0.00                                 |
| hsa-miR-561-4380938     | 40.00                                                                          | 35.44                        | 40.00                       | 40.00                     | 4.56                                                                                      | 0.00                                    | 0.00                                 |

Supplemental Table 1.

| MicroRNA ABI Assay ID   | $\Delta CT = (\text{Raw CT miRNA}) - (\text{Raw CT mean endogenous controls})$ |                              |                           |                           | $\Delta\Delta CT = \Delta CT_{\text{brain region 1}} - \Delta CT_{\text{brain region 2}}$ |                                        |                                     |
|-------------------------|--------------------------------------------------------------------------------|------------------------------|---------------------------|---------------------------|-------------------------------------------------------------------------------------------|----------------------------------------|-------------------------------------|
|                         | $\Delta CT_{\text{CntrlCB}}$                                                   | $\Delta CT_{\text{CntrlHP}}$ | $\Delta CT_{\text{ADCB}}$ | $\Delta CT_{\text{ADHP}}$ | $\Delta\Delta CT[\text{ADHP-CntrlHP}]$                                                    | $\Delta\Delta CT[\text{ADCB-CntrlCB}]$ | $\Delta\Delta CT[\text{ADHP-ADCB}]$ |
| hsa-miR-556-5p-4395455  | 40.00                                                                          | 35.74                        | 40.00                     | 40.00                     | 4.26                                                                                      | 0.00                                   | 0.00                                |
| hsa-miR-509-5p-4395346  | 40.00                                                                          | 35.88                        | 31.86                     | 40.00                     | 4.12                                                                                      | -8.14                                  | 8.14                                |
| hsa-miR-589-4395520     | 33.98                                                                          | 35.95                        | 33.98                     | 40.00                     | 4.05                                                                                      | -0.01                                  | 6.02                                |
| hsa-miR-548a-3p-4380948 | 40.00                                                                          | 35.96                        | 35.97                     | 40.00                     | 4.04                                                                                      | -4.04                                  | 4.04                                |
| hsa-miR-618-4380996     | 34.99                                                                          | 35.99                        | 32.98                     | 40.00                     | 4.01                                                                                      | -2.01                                  | 7.02                                |
| hsa-miR-888-4395323     | 33.97                                                                          | 35.99                        | 33.97                     | 40.00                     | 4.01                                                                                      | 0.00                                   | 6.03                                |
| hsa-miR-517a-4395513    | 35.02                                                                          | 36.01                        | 33.99                     | 40.00                     | 3.99                                                                                      | -1.03                                  | 6.01                                |
| hsa-miR-325-4373051     | 40.00                                                                          | 6.28                         | 40.00                     | 30.96                     | 24.68                                                                                     | 0.00                                   | -9.04                               |
| hsa-miR-337-5p-4395267  | 32.98                                                                          | 15.17                        | 33.00                     | 30.98                     | 15.81                                                                                     | 0.02                                   | -2.02                               |
| hsa-miR-495-4381078     | 26.95                                                                          | 27.96                        | 27.98                     | 35.90                     | 7.93                                                                                      | 1.03                                   | 7.92                                |
| hsa-miR-491-5p-4381053  | 27.98                                                                          | 25.95                        | 26.95                     | 34.87                     | 8.92                                                                                      | -1.03                                  | 7.93                                |
| hsa-miR-484-4381032     | 21.96                                                                          | 23.97                        | 21.96                     | 34.01                     | 10.04                                                                                     | 0.00                                   | 12.04                               |
| hsa-miR-504-4395195     | 34.05                                                                          | 29.98                        | 32.02                     | 36.05                     | 6.07                                                                                      | -2.03                                  | 4.03                                |
| hsa-miR-499-5p-4381047  | 40.00                                                                          | 29.88                        | 31.80                     | 35.97                     | 6.09                                                                                      | -8.20                                  | 4.18                                |
| hsa-miR-485-3p-4378095  | 26.97                                                                          | 25.94                        | 26.97                     | 34.01                     | 8.07                                                                                      | 0.00                                   | 7.05                                |
| hsa-miR-505-4395200     | 30.98                                                                          | 30.98                        | 30.00                     | 36.07                     | 5.08                                                                                      | -0.99                                  | 6.07                                |
| hsa-miR-450b-5p-4395318 | 40.00                                                                          | 26.75                        | 40.00                     | 33.92                     | 7.17                                                                                      | 0.00                                   | -6.08                               |
| hsa-miR-502-5p-4373227  | 32.00                                                                          | 31.10                        | 31.95                     | 36.01                     | 4.90                                                                                      | -0.06                                  | 4.06                                |
| hsa-miR-487b-4378102    | 28.98                                                                          | 28.98                        | 28.98                     | 34.61                     | 5.63                                                                                      | 0.00                                   | 5.64                                |
| hsa-miR-433-4373205     | 27.96                                                                          | 26.96                        | 28.98                     | 32.98                     | 6.02                                                                                      | 1.01                                   | 4.01                                |
| hsa-miR-222-4395387     | 25.96                                                                          | 21.95                        | 24.95                     | 29.95                     | 8.01                                                                                      | -1.01                                  | 5.01                                |
| hsa-miR-485-5p-4373212  | 28.96                                                                          | 29.00                        | 28.95                     | 34.03                     | 5.04                                                                                      | -0.01                                  | 5.09                                |
| hsa-miR-454-4395434     | 25.96                                                                          | 28.96                        | 25.96                     | 33.99                     | 5.03                                                                                      | 0.00                                   | 8.04                                |
| hsa-miR-494-4395476     | 29.97                                                                          | 30.97                        | 29.96                     | 35.05                     | 4.08                                                                                      | -0.01                                  | 5.09                                |
| hsa-miR-486-5p-4378096  | 29.97                                                                          | 30.05                        | 29.98                     | 34.47                     | 4.42                                                                                      | 0.01                                   | 4.50                                |
| hsa-miR-30c-4373060     | 20.97                                                                          | 22.97                        | 20.96                     | 30.24                     | 7.26                                                                                      | -0.01                                  | 9.27                                |
| hsa-miR-382-4373019     | 25.98                                                                          | 26.01                        | 26.00                     | 32.02                     | 6.02                                                                                      | 0.01                                   | 6.03                                |
| hsa-miR-374b-4381045    | 24.98                                                                          | 25.97                        | 25.99                     | 31.99                     | 6.02                                                                                      | 1.01                                   | 6.00                                |
| hsa-miR-24-4373072      | 22.98                                                                          | 22.97                        | 22.99                     | 29.97                     | 7.00                                                                                      | 0.02                                   | 6.98                                |
| hsa-miR-425-4380926     | 27.98                                                                          | 27.97                        | 28.01                     | 32.97                     | 4.99                                                                                      | 0.03                                   | 4.95                                |
| hsa-miR-488-4395468     | 31.98                                                                          | 30.96                        | 32.98                     | 34.74                     | 3.78                                                                                      | 1.00                                   | 1.76                                |
| hsa-miR-500-4395539     | 29.97                                                                          | 32.99                        | 30.98                     | 35.98                     | 2.99                                                                                      | 1.02                                   | 5.00                                |
| hsa-miR-320-4395388     | 22.97                                                                          | 24.97                        | 22.95                     | 30.87                     | 5.90                                                                                      | -0.02                                  | 7.92                                |
| hsa-miR-483-5p-4395449  | 30.96                                                                          | 29.96                        | 30.94                     | 34.00                     | 4.05                                                                                      | -0.02                                  | 3.06                                |
| hsa-miR-383-4373018     | 25.97                                                                          | 26.94                        | 25.97                     | 32.06                     | 5.12                                                                                      | 0.00                                   | 6.10                                |
| hsa-miR-451-4373360     | 29.97                                                                          | 29.95                        | 28.97                     | 33.96                     | 4.01                                                                                      | -1.00                                  | 4.99                                |

Supplemental Table 1.

| MicroRNA ABI Assay ID  | $\Delta CT = (\text{Raw CT miRNA}) - (\text{Raw CT mean endogenous controls})$ |                              |                           |                           | $\Delta\Delta CT = \Delta CT_{\text{brain region 1}} - \Delta CT_{\text{brain region 2}}$ |                                        |                                     |
|------------------------|--------------------------------------------------------------------------------|------------------------------|---------------------------|---------------------------|-------------------------------------------------------------------------------------------|----------------------------------------|-------------------------------------|
|                        | $\Delta CT_{\text{CntrlCB}}$                                                   | $\Delta CT_{\text{CntrlHP}}$ | $\Delta CT_{\text{ADCB}}$ | $\Delta CT_{\text{ADHP}}$ | $\Delta\Delta CT[\text{ADHP-CntrlHP}]$                                                    | $\Delta\Delta CT[\text{ADCB-CntrlCB}]$ | $\Delta\Delta CT[\text{ADHP-ADCB}]$ |
| hsa-miR-30b-4373290    | 22.98                                                                          | 23.98                        | 21.98                     | 30.05                     | 6.07                                                                                      | -1.00                                  | 8.07                                |
| hsa-miR-29a-4395223    | 23.96                                                                          | 23.95                        | 22.94                     | 30.01                     | 6.06                                                                                      | -1.03                                  | 7.08                                |
| hsa-miR-26a-4395166    | 21.96                                                                          | 23.98                        | 21.96                     | 29.98                     | 6.00                                                                                      | 0.00                                   | 8.02                                |
| hsa-miR-34a-4395168    | 26.97                                                                          | 26.99                        | 26.98                     | 31.85                     | 4.86                                                                                      | 0.01                                   | 4.87                                |
| hsa-miR-411-4381013    | 26.95                                                                          | 28.97                        | 27.99                     | 32.96                     | 3.99                                                                                      | 1.04                                   | 4.97                                |
| hsa-miR-410-4378093    | 27.95                                                                          | 28.97                        | 28.95                     | 32.91                     | 3.94                                                                                      | 1.00                                   | 3.96                                |
| hsa-miR-490-3p-4373215 | 40.00                                                                          | 32.03                        | 29.57                     | 34.86                     | 2.84                                                                                      | -10.43                                 | 5.30                                |
| hsa-miR-223-4395406    | 25.96                                                                          | 24.95                        | 24.97                     | 29.96                     | 5.01                                                                                      | -0.99                                  | 4.99                                |
| hsa-miR-374a-4373028   | 26.96                                                                          | 27.94                        | 27.98                     | 31.99                     | 4.04                                                                                      | 1.02                                   | 4.01                                |
| hsa-miR-376c-4395233   | 24.98                                                                          | 27.98                        | 24.99                     | 32.00                     | 4.02                                                                                      | 0.01                                   | 7.01                                |
| hsa-miR-365-4373194    | 26.94                                                                          | 27.98                        | 26.97                     | 31.97                     | 3.99                                                                                      | 0.03                                   | 5.00                                |
| hsa-miR-455-3p-4395355 | 27.95                                                                          | 30.97                        | 27.98                     | 33.99                     | 3.02                                                                                      | 0.03                                   | 6.01                                |
| hsa-miR-323-3p-4395338 | 25.96                                                                          | 26.96                        | 25.98                     | 30.91                     | 3.95                                                                                      | 0.02                                   | 4.93                                |
| hsa-miR-23a-4373074    | 40.00                                                                          | 25.81                        | 40.00                     | 29.96                     | 4.16                                                                                      | 0.00                                   | -10.04                              |
| hsa-miR-376a-4373026   | 27.98                                                                          | 28.97                        | 27.97                     | 32.00                     | 3.03                                                                                      | -0.01                                  | 4.03                                |
| hsa-miR-375-4373027    | 30.97                                                                          | 28.96                        | 30.98                     | 31.99                     | 3.03                                                                                      | 0.01                                   | 1.01                                |
| hsa-miR-218-4373081    | 21.94                                                                          | 24.97                        | 21.97                     | 29.00                     | 4.03                                                                                      | 0.02                                   | 7.03                                |
| hsa-miR-379-4373349    | 26.94                                                                          | 28.99                        | 26.95                     | 32.01                     | 3.02                                                                                      | 0.01                                   | 5.05                                |
| hsa-miR-31-4395390     | 22.97                                                                          | 26.97                        | 21.98                     | 30.49                     | 3.52                                                                                      | -0.99                                  | 8.51                                |
| hsa-miR-496-4386771    | 40.00                                                                          | 34.31                        | 36.03                     | 35.96                     | 1.65                                                                                      | -3.97                                  | -0.07                               |
| hsa-miR-197-4373102    | 24.00                                                                          | 24.00                        | 23.97                     | 27.98                     | 3.98                                                                                      | -0.03                                  | 4.01                                |
| hsa-miR-345-4395297    | 26.98                                                                          | 27.98                        | 25.95                     | 31.00                     | 3.02                                                                                      | -1.03                                  | 5.05                                |
| hsa-miR-324-5p-4373052 | 27.96                                                                          | 27.94                        | 27.96                     | 30.96                     | 3.02                                                                                      | 0.00                                   | 3.00                                |
| hsa-miR-339-3p-4395295 | 26.98                                                                          | 27.98                        | 26.99                     | 30.99                     | 3.01                                                                                      | 0.00                                   | 4.00                                |
| hsa-miR-339-5p-4395368 | 28.03                                                                          | 27.98                        | 28.99                     | 30.99                     | 3.01                                                                                      | 0.96                                   | 2.00                                |
| hsa-miR-489-4395469    | 35.07                                                                          | 32.98                        | 33.97                     | 34.82                     | 1.84                                                                                      | -1.10                                  | 0.85                                |
| hsa-miR-26b-4395167    | 24.97                                                                          | 26.97                        | 24.96                     | 29.98                     | 3.01                                                                                      | -0.01                                  | 5.02                                |
| hsa-miR-221-4373077    | 30.96                                                                          | 27.01                        | 30.98                     | 29.95                     | 2.94                                                                                      | 0.02                                   | -1.03                               |
| hsa-miR-487a-4378097   | 32.97                                                                          | 32.97                        | 32.98                     | 34.59                     | 1.62                                                                                      | 0.01                                   | 1.61                                |
| hsa-miR-423-5p-4395451 | 30.95                                                                          | 31.01                        | 29.97                     | 32.96                     | 1.95                                                                                      | -0.98                                  | 2.99                                |
| hsa-miR-193b-4395478   | 25.96                                                                          | 24.98                        | 26.98                     | 27.97                     | 3.00                                                                                      | 1.01                                   | 1.00                                |
| hsa-miR-34c-5p-4373036 | 36.01                                                                          | 29.99                        | 35.01                     | 31.95                     | 1.96                                                                                      | -1.00                                  | -3.06                               |
| hsa-miR-181a-4373117   | 24.98                                                                          | 23.97                        | 24.99                     | 26.98                     | 3.01                                                                                      | 0.01                                   | 1.99                                |

Supplemental Table 1.

| MicroRNA ABI Assay ID    | $\Delta CT = (\text{Raw CT miRNA}) - (\text{Raw CT mean endogenous controls})$ |                              |                           |                           | $\Delta\Delta CT = \Delta CT_{\text{brain region 1}} - \Delta CT_{\text{brain region 2}}$ |                                        |                                     |
|--------------------------|--------------------------------------------------------------------------------|------------------------------|---------------------------|---------------------------|-------------------------------------------------------------------------------------------|----------------------------------------|-------------------------------------|
|                          | $\Delta CT_{\text{CntrlCB}}$                                                   | $\Delta CT_{\text{CntrlHP}}$ | $\Delta CT_{\text{ADCB}}$ | $\Delta CT_{\text{ADHP}}$ | $\Delta\Delta CT[\text{ADHP-CntrlHP}]$                                                    | $\Delta\Delta CT[\text{ADCB-CntrlCB}]$ | $\Delta\Delta CT[\text{ADHP-ADCB}]$ |
| hsa-miR-19b-4373098      | 25.00                                                                          | 25.98                        | 24.97                     | 28.61                     | 2.63                                                                                      | -0.02                                  | 3.64                                |
| hsa-miR-502-3p-4395194   | 33.99                                                                          | 34.98                        | 32.97                     | 36.01                     | 1.03                                                                                      | -1.02                                  | 3.04                                |
| hsa-miR-340-4395369      | 27.97                                                                          | 28.97                        | 27.97                     | 30.99                     | 2.02                                                                                      | 0.00                                   | 3.03                                |
| hsa-miR-145-4395389      | 22.98                                                                          | 22.97                        | 22.95                     | 25.98                     | 3.01                                                                                      | -0.02                                  | 3.03                                |
| hsa-miR-324-3p-4395272   | 27.99                                                                          | 28.98                        | 27.97                     | 30.95                     | 1.98                                                                                      | -0.02                                  | 2.98                                |
| hsa-miR-342-5p-4395258   | 27.98                                                                          | 29.04                        | 27.99                     | 31.00                     | 1.95                                                                                      | 0.01                                   | 3.00                                |
| hsa-miR-28-3p-4395557    | 26.97                                                                          | 27.95                        | 25.94                     | 29.98                     | 2.03                                                                                      | -1.03                                  | 4.04                                |
| hsa-miR-20a-4373286      | 26.98                                                                          | 26.98                        | 26.98                     | 28.98                     | 1.99                                                                                      | 0.00                                   | 1.99                                |
| hsa-miR-210-4373089      | 27.05                                                                          | 26.98                        | 26.98                     | 28.98                     | 1.99                                                                                      | -0.07                                  | 2.00                                |
| hsa-miR-150-4373127      | 24.95                                                                          | 24.97                        | 24.97                     | 26.96                     | 1.99                                                                                      | 0.03                                   | 1.98                                |
| hsa-miR-16-4373121       | 22.98                                                                          | 24.99                        | 22.98                     | 26.97                     | 1.98                                                                                      | 0.00                                   | 3.99                                |
| hsa-miR-361-5p-4373035   | 29.98                                                                          | 30.99                        | 30.99                     | 31.96                     | 0.96                                                                                      | 1.01                                   | 0.97                                |
| hsa-miR-409-5p-4395442   | 31.99                                                                          | 32.00                        | 31.98                     | 32.83                     | 0.83                                                                                      | -0.01                                  | 0.85                                |
| hsa-miR-335-4373045      | 29.97                                                                          | 29.97                        | 29.96                     | 30.98                     | 1.01                                                                                      | -0.01                                  | 1.02                                |
| hsa-miR-331-5p-4395344   | 30.96                                                                          | 30.03                        | 31.00                     | 30.98                     | 0.95                                                                                      | 0.03                                   | -0.02                               |
| hsa-miR-27b-4373068      | 27.96                                                                          | 28.97                        | 27.97                     | 29.98                     | 1.01                                                                                      | 0.01                                   | 2.02                                |
| hsa-miR-219-2-3p-4395501 | 29.99                                                                          | 27.95                        | 29.98                     | 29.01                     | 1.06                                                                                      | -0.01                                  | -0.97                               |
| hsa-miR-186-4395396      | 24.95                                                                          | 25.94                        | 24.95                     | 27.12                     | 1.18                                                                                      | 0.00                                   | 2.17                                |
| hsa-miR-212-4373087      | 28.98                                                                          | 27.98                        | 29.99                     | 28.98                     | 1.00                                                                                      | 1.01                                   | -1.01                               |
| hsa-miR-195-4373105      | 23.98                                                                          | 26.96                        | 23.96                     | 27.98                     | 1.02                                                                                      | -0.02                                  | 4.02                                |
| hsa-miR-17-4395419       | 25.95                                                                          | 25.96                        | 25.96                     | 26.97                     | 1.01                                                                                      | 0.00                                   | 1.02                                |
| hsa-miR-125b-4373148     | 22.98                                                                          | 22.99                        | 21.94                     | 23.97                     | 0.99                                                                                      | -1.04                                  | 2.03                                |
| hsa-miR-29c-4395171      | 28.00                                                                          | 29.99                        | 27.98                     | 30.02                     | 0.03                                                                                      | -0.02                                  | 2.04                                |
| hsa-miR-127-3p-4373147   | 23.98                                                                          | 23.95                        | 23.98                     | 23.98                     | 0.03                                                                                      | 0.00                                   | 0.00                                |
| hsa-miR-25-4373071       | 29.95                                                                          | 29.96                        | 28.95                     | 29.97                     | 0.01                                                                                      | -1.01                                  | 1.03                                |
| hsa-miR-455-5p-4378098   | 28.97                                                                          | 33.99                        | 27.98                     | 34.00                     | 0.01                                                                                      | -1.00                                  | 6.02                                |
| hsa-miR-146a-4373132     | 25.94                                                                          | 25.98                        | 25.98                     | 25.99                     | 0.01                                                                                      | 0.04                                   | 0.02                                |
| hsa-miR-509-3-5p-4395266 | 40.00                                                                          | 40.00                        | 40.00                     | 40.00                     | 0.00                                                                                      | 0.00                                   | 0.00                                |
| hsa-miR-510-4395352      | 40.00                                                                          | 40.00                        | 40.00                     | 40.00                     | 0.00                                                                                      | 0.00                                   | 0.00                                |
| hsa-miR-512-5p-4373238   | 40.00                                                                          | 40.00                        | 40.00                     | 40.00                     | 0.00                                                                                      | 0.00                                   | 0.00                                |
| hsa-miR-513-5p-4395201   | 40.00                                                                          | 40.00                        | 40.00                     | 40.00                     | 0.00                                                                                      | 0.00                                   | 0.00                                |
| hsa-miR-515-3p-4395480   | 40.00                                                                          | 40.00                        | 40.00                     | 40.00                     | 0.00                                                                                      | 0.00                                   | 0.00                                |
| hsa-miR-515-5p-4373242   | 28.29                                                                          | 40.00                        | 40.00                     | 40.00                     | 0.00                                                                                      | 11.71                                  | 0.00                                |
| hsa-miR-516a-5p-4395527  | 40.00                                                                          | 40.00                        | 40.00                     | 40.00                     | 0.00                                                                                      | 0.00                                   | 0.00                                |
| hsa-miR-516b-4395172     | 40.00                                                                          | 40.00                        | 36.00                     | 40.00                     | 0.00                                                                                      | -4.00                                  | 4.00                                |
| hsa-miR-517b-4373244     | 40.00                                                                          | 40.00                        | 40.00                     | 40.00                     | 0.00                                                                                      | 0.00                                   | 0.00                                |
| hsa-miR-518a-3p-4395508  | 35.98                                                                          | 40.00                        | 40.00                     | 40.00                     | 0.00                                                                                      | 4.02                                   | 0.00                                |
| hsa-miR-518a-5p-4395507  | 40.00                                                                          | 40.00                        | 40.00                     | 40.00                     | 0.00                                                                                      | 0.00                                   | 0.00                                |
| hsa-miR-518b-4373246     | 30.61                                                                          | 40.00                        | 34.92                     | 40.00                     | 0.00                                                                                      | 4.32                                   | 5.08                                |



Supplemental Table 1.

| MicroRNA ABI Assay ID   | $\Delta CT = (\text{Raw CT miRNA}) - (\text{Raw CT mean endogenous controls})$ |                              |                           |                           | $\Delta\Delta CT = \Delta CT_{\text{brain region 1}} - \Delta CT_{\text{brain region 2}}$ |                                        |                                     |
|-------------------------|--------------------------------------------------------------------------------|------------------------------|---------------------------|---------------------------|-------------------------------------------------------------------------------------------|----------------------------------------|-------------------------------------|
|                         | $\Delta CT_{\text{CntrlCB}}$                                                   | $\Delta CT_{\text{CntrlHP}}$ | $\Delta CT_{\text{ADCB}}$ | $\Delta CT_{\text{ADHP}}$ | $\Delta\Delta CT[\text{ADHP-CntrlHP}]$                                                    | $\Delta\Delta CT[\text{ADCB-CntrlCB}]$ | $\Delta\Delta CT[\text{ADHP-ADCB}]$ |
| hsa-miR-518c-4395512    | 40.00                                                                          | 40.00                        | 40.00                     | 40.00                     | 0.00                                                                                      | 0.00                                   | 0.00                                |
| hsa-miR-518f-4395499    | 40.00                                                                          | 40.00                        | 37.14                     | 40.00                     | 0.00                                                                                      | -2.86                                  | 2.86                                |
| hsa-miR-519c-3p-4373251 | 40.00                                                                          | 40.00                        | 36.97                     | 40.00                     | 0.00                                                                                      | -3.03                                  | 3.03                                |
| hsa-miR-519e-4395481    | 40.00                                                                          | 40.00                        | 40.00                     | 40.00                     | 0.00                                                                                      | 0.00                                   | 0.00                                |
| hsa-miR-520a-3p-4373268 | 40.00                                                                          | 40.00                        | 34.00                     | 40.00                     | 0.00                                                                                      | -6.00                                  | 6.00                                |
| hsa-miR-520a-5p-4378085 | 40.00                                                                          | 40.00                        | 40.00                     | 40.00                     | 0.00                                                                                      | 0.00                                   | 0.00                                |
| hsa-miR-520b-4373252    | 36.93                                                                          | 40.00                        | 40.00                     | 40.00                     | 0.00                                                                                      | 3.07                                   | 0.00                                |
| hsa-miR-520d-5p-4395504 | 40.00                                                                          | 40.00                        | 40.00                     | 40.00                     | 0.00                                                                                      | 0.00                                   | 0.00                                |
| hsa-miR-520e-4373255    | 40.00                                                                          | 40.00                        | 40.00                     | 40.00                     | 0.00                                                                                      | 0.00                                   | 0.00                                |
| hsa-miR-520f-4373256    | 40.00                                                                          | 40.00                        | 40.00                     | 40.00                     | 0.00                                                                                      | 0.00                                   | 0.00                                |
| hsa-miR-520g-4373257    | 40.00                                                                          | 40.00                        | 40.00                     | 40.00                     | 0.00                                                                                      | 0.00                                   | 0.00                                |
| hsa-miR-521-4373259     | 8.94                                                                           | 40.00                        | 35.99                     | 40.00                     | 0.00                                                                                      | 27.05                                  | 4.01                                |
| hsa-miR-523-4395497     | 40.00                                                                          | 40.00                        | 35.99                     | 40.00                     | 0.00                                                                                      | -4.01                                  | 4.01                                |
| hsa-miR-524-5p-4395174  | 40.00                                                                          | 40.00                        | 40.00                     | 40.00                     | 0.00                                                                                      | 0.00                                   | 0.00                                |
| hsa-miR-525-3p-4395496  | 40.00                                                                          | 40.00                        | 12.55                     | 40.00                     | 0.00                                                                                      | -27.45                                 | 27.45                               |
| hsa-miR-525-5p-4378088  | 40.00                                                                          | 40.00                        | 40.00                     | 40.00                     | 0.00                                                                                      | 0.00                                   | 0.00                                |
| hsa-miR-526b-4395493    | 40.00                                                                          | 40.00                        | 40.00                     | 40.00                     | 0.00                                                                                      | 0.00                                   | 0.00                                |
| hsa-miR-542-5p-4395351  | 40.00                                                                          | 40.00                        | 40.00                     | 40.00                     | 0.00                                                                                      | 0.00                                   | 0.00                                |
| hsa-miR-544-4395376     | 40.00                                                                          | 40.00                        | 40.00                     | 40.00                     | 0.00                                                                                      | 0.00                                   | 0.00                                |
| hsa-miR-545-4395378     | 35.96                                                                          | 40.00                        | 35.05                     | 40.00                     | 0.00                                                                                      | -0.91                                  | 4.95                                |
| hsa-miR-548a-5p-4395523 | 40.00                                                                          | 40.00                        | 20.75                     | 40.00                     | 0.00                                                                                      | -19.25                                 | 19.25                               |
| hsa-miR-548b-3p-4380951 | 40.00                                                                          | 40.00                        | 40.00                     | 40.00                     | 0.00                                                                                      | 0.00                                   | 0.00                                |
| hsa-miR-548c-3p-4380993 | 12.03                                                                          | 40.00                        | 40.00                     | 40.00                     | 0.00                                                                                      | 27.97                                  | 0.00                                |
| hsa-miR-551b-4380945    | 35.96                                                                          | 40.00                        | 33.97                     | 40.00                     | 0.00                                                                                      | -2.00                                  | 6.03                                |
| hsa-miR-556-3p-4395456  | 40.00                                                                          | 40.00                        | 34.96                     | 40.00                     | 0.00                                                                                      | -5.04                                  | 5.04                                |
| hsa-miR-570-4395458     | 40.00                                                                          | 40.00                        | 35.95                     | 40.00                     | 0.00                                                                                      | -4.05                                  | 4.05                                |
| hsa-miR-576-3p-4395462  | 36.99                                                                          | 40.00                        | 34.96                     | 40.00                     | 0.00                                                                                      | -2.03                                  | 5.04                                |
| hsa-miR-579-4395509     | 34.98                                                                          | 40.00                        | 34.97                     | 40.00                     | 0.00                                                                                      | -0.01                                  | 5.03                                |
| hsa-miR-582-5p-4395175  | 40.00                                                                          | 40.00                        | 40.00                     | 40.00                     | 0.00                                                                                      | 0.00                                   | 0.00                                |
| hsa-miR-615-3p-4386777  | 40.00                                                                          | 40.00                        | 40.00                     | 40.00                     | 0.00                                                                                      | 0.00                                   | 0.00                                |
| hsa-miR-615-5p-4395464  | 40.00                                                                          | 40.00                        | 40.00                     | 40.00                     | 0.00                                                                                      | 0.00                                   | 0.00                                |
| hsa-miR-624-4395541     | 40.00                                                                          | 40.00                        | 40.00                     | 40.00                     | 0.00                                                                                      | 0.00                                   | 0.00                                |
| hsa-miR-627-4380967     | 40.00                                                                          | 40.00                        | 40.00                     | 40.00                     | 0.00                                                                                      | 0.00                                   | 0.00                                |
| hsa-miR-629-4395547     | 40.00                                                                          | 40.00                        | 33.98                     | 40.00                     | 0.00                                                                                      | -6.02                                  | 6.02                                |

Supplemental Table 1.

| MicroRNA ABI Assay ID   | $\Delta CT = (\text{Raw CT miRNA}) - (\text{Raw CT mean endogenous controls})$ |                              |                           |                           | $\Delta\Delta CT = \Delta CT_{\text{brain region 1}} - \Delta CT_{\text{brain region 2}}$ |                                        |                                     |
|-------------------------|--------------------------------------------------------------------------------|------------------------------|---------------------------|---------------------------|-------------------------------------------------------------------------------------------|----------------------------------------|-------------------------------------|
|                         | $\Delta CT_{\text{CntrlCB}}$                                                   | $\Delta CT_{\text{CntrlHP}}$ | $\Delta CT_{\text{ADCB}}$ | $\Delta CT_{\text{ADHP}}$ | $\Delta\Delta CT[\text{ADHP-CntrlHP}]$                                                    | $\Delta\Delta CT[\text{ADCB-CntrlCB}]$ | $\Delta\Delta CT[\text{ADHP-ADCB}]$ |
| hsa-miR-651-4381007     | 34.97                                                                          | 40.00                        | 40.00                     | 40.00                     | 0.00                                                                                      | 5.03                                   | 0.00                                |
| hsa-miR-653-4395403     | 40.00                                                                          | 40.00                        | 40.00                     | 40.00                     | 0.00                                                                                      | 0.00                                   | 0.00                                |
| hsa-miR-654-3p-4395350  | 33.98                                                                          | 40.00                        | 32.96                     | 40.00                     | 0.00                                                                                      | -1.01                                  | 7.04                                |
| hsa-miR-672-4395438     | 40.00                                                                          | 40.00                        | 40.00                     | 40.00                     | 0.00                                                                                      | 0.00                                   | 0.00                                |
| hsa-miR-674-4395193     | 40.00                                                                          | 40.00                        | 40.00                     | 40.00                     | 0.00                                                                                      | 0.00                                   | 0.00                                |
| hsa-miR-871-4395465     | 40.00                                                                          | 40.00                        | 40.00                     | 40.00                     | 0.00                                                                                      | 0.00                                   | 0.00                                |
| hsa-miR-872-4395375     | 40.00                                                                          | 40.00                        | 40.00                     | 40.00                     | 0.00                                                                                      | 0.00                                   | 0.00                                |
| hsa-miR-873-4395467     | 40.00                                                                          | 40.00                        | 40.00                     | 40.00                     | 0.00                                                                                      | 0.00                                   | 0.00                                |
| hsa-miR-875-3p-4395315  | 40.00                                                                          | 40.00                        | 40.00                     | 40.00                     | 0.00                                                                                      | 0.00                                   | 0.00                                |
| hsa-miR-876-5p-4395316  | 40.00                                                                          | 40.00                        | 40.00                     | 40.00                     | 0.00                                                                                      | 0.00                                   | 0.00                                |
| hsa-miR-885-3p-4395483  | 29.21                                                                          | 40.00                        | 27.02                     | 40.00                     | 0.00                                                                                      | -2.19                                  | 12.98                               |
| hsa-miR-890-4395320     | 40.00                                                                          | 40.00                        | 31.92                     | 40.00                     | 0.00                                                                                      | -8.08                                  | 8.08                                |
| hsa-miR-891b-4395321    | 40.00                                                                          | 40.00                        | 40.00                     | 40.00                     | 0.00                                                                                      | 0.00                                   | 0.00                                |
| hsa-miR-892a-4395306    | 40.00                                                                          | 40.00                        | 40.00                     | 40.00                     | 0.00                                                                                      | 0.00                                   | 0.00                                |
| hsa-miR-96-4373372      | 40.00                                                                          | 40.00                        | 40.00                     | 40.00                     | 0.00                                                                                      | 0.00                                   | 0.00                                |
| hsa-miR-21-4373090      | 27.97                                                                          | 28.98                        | 27.98                     | 28.98                     | 0.00                                                                                      | 0.00                                   | 1.00                                |
| hsa-miR-27a-4373287     | 29.97                                                                          | 29.98                        | 30.00                     | 29.98                     | 0.00                                                                                      | 0.03                                   | -0.02                               |
| hsa-miR-422a-4395408    | 33.01                                                                          | 32.97                        | 33.97                     | 32.96                     | -0.01                                                                                     | 0.97                                   | -1.01                               |
| hsa-miR-20b-4373263     | 29.97                                                                          | 28.99                        | 28.98                     | 28.98                     | -0.01                                                                                     | -0.99                                  | 0.00                                |
| hsa-miR-452-4395440     | 32.97                                                                          | 33.98                        | 30.13                     | 33.98                     | -0.01                                                                                     | -2.84                                  | 3.85                                |
| hsa-miR-15b-4373122     | 26.99                                                                          | 26.98                        | 26.98                     | 26.97                     | -0.02                                                                                     | 0.00                                   | -0.02                               |
| hsa-miR-296-5p-4373066  | 29.99                                                                          | 30.00                        | 29.93                     | 29.99                     | -0.01                                                                                     | -0.05                                  | 0.05                                |
| hsa-miR-338-3p-4395363  | 31.01                                                                          | 31.00                        | 29.97                     | 30.98                     | -0.02                                                                                     | -1.04                                  | 1.01                                |
| hsa-let-7e-4395517      | 21.96                                                                          | 22.99                        | 22.00                     | 22.95                     | -0.05                                                                                     | 0.04                                   | 0.94                                |
| hsa-miR-23b-4373073     | 30.00                                                                          | 30.02                        | 30.03                     | 29.97                     | -0.05                                                                                     | 0.04                                   | -0.06                               |
| hsa-miR-363-4378090     | 30.78                                                                          | 32.02                        | 33.00                     | 31.96                     | -0.06                                                                                     | 2.22                                   | -1.04                               |
| hsa-let-7b-4395446      | 20.94                                                                          | 23.00                        | 21.00                     | 21.97                     | -1.03                                                                                     | 0.07                                   | 0.97                                |
| hsa-miR-139-3p-4395424  | 29.96                                                                          | 25.96                        | 29.01                     | 25.00                     | -0.96                                                                                     | -0.96                                  | -4.01                               |
| hsa-miR-299-5p-4373188  | 30.96                                                                          | 30.69                        | 31.01                     | 30.01                     | -0.69                                                                                     | 0.05                                   | -1.00                               |
| hsa-miR-146b-5p-4373178 | 26.99                                                                          | 26.98                        | 26.96                     | 26.00                     | -0.98                                                                                     | -0.03                                  | -0.95                               |
| hsa-miR-219-5p-4373080  | 29.96                                                                          | 29.97                        | 29.95                     | 29.02                     | -0.96                                                                                     | -0.01                                  | -0.93                               |
| hsa-miR-301a-4373064    | 28.97                                                                          | 30.96                        | 28.95                     | 30.02                     | -0.95                                                                                     | -0.02                                  | 1.06                                |
| hsa-miR-28-5p-4373067   | 29.97                                                                          | 30.95                        | 28.95                     | 29.98                     | -0.97                                                                                     | -1.02                                  | 1.03                                |
| hsa-miR-329-4373191     | 31.99                                                                          | 31.99                        | 31.99                     | 30.97                     | -1.02                                                                                     | 0.00                                   | -1.02                               |
| hsa-miR-330-5p-4395341  | 33.09                                                                          | 32.02                        | 31.99                     | 30.97                     | -1.05                                                                                     | -1.09                                  | -1.02                               |

Supplemental Table 1.

| MicroRNA ABI Assay ID   | $\Delta CT = (\text{Raw CT miRNA}) - (\text{Raw CT mean endogenous controls})$ |                              |                           |                           | $\Delta\Delta CT = \Delta CT_{\text{brain region 1}} - \Delta CT_{\text{brain region 2}}$ |                                           |                                        |
|-------------------------|--------------------------------------------------------------------------------|------------------------------|---------------------------|---------------------------|-------------------------------------------------------------------------------------------|-------------------------------------------|----------------------------------------|
|                         | $\Delta CT_{\text{CntrlCB}}$                                                   | $\Delta CT_{\text{CntrlHP}}$ | $\Delta CT_{\text{ADCB}}$ | $\Delta CT_{\text{ADHP}}$ | $\Delta\Delta CT_{[\text{ADHP-CntrlHP}]}$                                                 | $\Delta\Delta CT_{[\text{ADCB-CntrlCB}]}$ | $\Delta\Delta CT_{[\text{ADHP-ADCB}]}$ |
| hsa-miR-326-4373050     | 34.93                                                                          | 32.02                        | 33.98                     | 30.96                     | -1.05                                                                                     | -0.95                                     | -3.02                                  |
| hsa-miR-100-4373160     | 24.01                                                                          | 24.98                        | 23.99                     | 22.97                     | -2.00                                                                                     | -0.02                                     | -1.02                                  |
| hsa-miR-362-5p-4378092  | 30.98                                                                          | 32.98                        | 31.00                     | 31.96                     | -1.01                                                                                     | 0.02                                      | 0.96                                   |
| hsa-let-7c-4373167      | 24.98                                                                          | 24.96                        | 23.94                     | 22.93                     | -2.03                                                                                     | -1.03                                     | -1.01                                  |
| hsa-miR-125a-5p-4395309 | 24.99                                                                          | 25.99                        | 23.96                     | 23.97                     | -2.02                                                                                     | -1.03                                     | 0.01                                   |
| hsa-miR-449b-4381011    | 31.98                                                                          | 34.01                        | 31.97                     | 32.99                     | -1.02                                                                                     | -0.02                                     | 1.03                                   |
| hsa-miR-128-4395327     | 25.99                                                                          | 26.97                        | 24.96                     | 24.90                     | -2.07                                                                                     | -1.04                                     | -0.05                                  |
| hsa-miR-140-5p-4373374  | 25.94                                                                          | 27.97                        | 25.96                     | 25.96                     | -2.01                                                                                     | 0.02                                      | 0.00                                   |
| hsa-miR-220b-4395317    | 30.94                                                                          | 30.94                        | 30.97                     | 29.25                     | -1.69                                                                                     | 0.02                                      | -1.72                                  |
| hsa-miR-193a-5p-4395392 | 28.97                                                                          | 29.98                        | 28.98                     | 27.97                     | -2.00                                                                                     | 0.01                                      | -1.01                                  |
| hsa-miR-106a-4395280    | 25.95                                                                          | 25.97                        | 25.97                     | 22.98                     | -2.99                                                                                     | 0.01                                      | -2.99                                  |
| hsa-miR-203-4373095     | 31.98                                                                          | 30.96                        | 31.98                     | 28.96                     | -2.00                                                                                     | 0.00                                      | -3.01                                  |
| hsa-let-7g-4395393      | 24.97                                                                          | 25.97                        | 25.00                     | 22.97                     | -3.00                                                                                     | 0.02                                      | -2.03                                  |
| hsa-miR-493-4395475     | 35.00                                                                          | 35.98                        | 34.99                     | 34.98                     | -1.01                                                                                     | -0.01                                     | -0.01                                  |
| hsa-let-7d-4395394      | 24.97                                                                          | 25.97                        | 24.98                     | 22.95                     | -3.02                                                                                     | 0.01                                      | -2.04                                  |
| hsa-miR-200c-4395411    | 29.96                                                                          | 30.98                        | 30.01                     | 28.95                     | -2.03                                                                                     | 0.05                                      | -1.05                                  |
| hsa-miR-214-4395417     | 32.00                                                                          | 31.01                        | 31.98                     | 28.98                     | -2.03                                                                                     | -0.02                                     | -2.99                                  |
| hsa-miR-200b-4395362    | 32.02                                                                          | 31.03                        | 31.93                     | 28.95                     | -2.08                                                                                     | -0.09                                     | -2.98                                  |
| hsa-miR-208-4373091     | 40.00                                                                          | 31.11                        | 40.00                     | 28.97                     | -2.14                                                                                     | 0.00                                      | -11.03                                 |
| hsa-miR-29b-4373288     | 31.00                                                                          | 31.99                        | 30.98                     | 30.01                     | -1.98                                                                                     | -0.01                                     | -0.97                                  |
| hsa-miR-133a-4395357    | 29.96                                                                          | 27.97                        | 29.94                     | 24.96                     | -3.01                                                                                     | -0.02                                     | -4.97                                  |
| hsa-miR-134-4373299     | 27.98                                                                          | 27.98                        | 27.97                     | 24.97                     | -3.01                                                                                     | -0.01                                     | -2.99                                  |
| hsa-miR-129-3p-4373297  | 25.96                                                                          | 27.98                        | 27.00                     | 24.94                     | -3.05                                                                                     | 1.03                                      | -2.06                                  |
| hsa-miR-143-4395360     | 28.98                                                                          | 28.99                        | 28.97                     | 25.97                     | -3.02                                                                                     | 0.00                                      | -3.00                                  |
| hsa-miR-185-4395382     | 30.99                                                                          | 29.98                        | 29.97                     | 26.99                     | -2.99                                                                                     | -1.03                                     | -2.98                                  |
| hsa-miR-381-4373020     | 34.96                                                                          | 33.95                        | 31.95                     | 32.01                     | -1.94                                                                                     | -3.01                                     | 0.06                                   |
| hsa-miR-103-4373158     | 26.99                                                                          | 26.97                        | 25.96                     | 22.98                     | -3.99                                                                                     | -1.03                                     | -2.98                                  |
| hsa-let-7f-4373164      | 25.99                                                                          | 26.98                        | 25.97                     | 22.96                     | -4.01                                                                                     | -0.02                                     | -3.01                                  |
| hsa-miR-19a-4373099     | 29.97                                                                          | 30.99                        | 29.98                     | 28.03                     | -2.95                                                                                     | 0.01                                      | -1.95                                  |
| hsa-miR-199a-3p-4395415 | 29.97                                                                          | 30.98                        | 29.97                     | 27.99                     | -3.00                                                                                     | 0.01                                      | -1.99                                  |
| hsa-miR-200a-4378069    | 29.00                                                                          | 31.74                        | 40.00                     | 28.94                     | -2.80                                                                                     | 11.00                                     | -11.06                                 |
| hsa-miR-137-4373301     | 35.95                                                                          | 28.98                        | 40.00                     | 24.98                     | -3.99                                                                                     | 4.05                                      | -15.02                                 |
| hsa-miR-140-3p-4395345  | 28.98                                                                          | 29.98                        | 28.98                     | 25.96                     | -4.02                                                                                     | 0.00                                      | -3.02                                  |
| hsa-miR-22-4373079      | 33.96                                                                          | 32.94                        | 29.02                     | 29.96                     | -2.98                                                                                     | -4.95                                     | 0.94                                   |
| hsa-miR-224-4395210     | 31.99                                                                          | 32.98                        | 31.98                     | 29.96                     | -3.02                                                                                     | -0.02                                     | -2.01                                  |
| hsa-miR-148a-4373130    | 32.96                                                                          | 30.98                        | 31.97                     | 26.95                     | -4.03                                                                                     | -0.99                                     | -5.02                                  |

Supplemental Table 1.

| MicroRNA ABI Assay ID   | $\Delta CT = (\text{Raw CT miRNA}) - (\text{Raw CT mean endogenous controls})$ |                              |                           |                           | $\Delta\Delta CT = \Delta CT_{\text{brain region 1}} - \Delta CT_{\text{brain region 2}}$ |                                        |                                     |
|-------------------------|--------------------------------------------------------------------------------|------------------------------|---------------------------|---------------------------|-------------------------------------------------------------------------------------------|----------------------------------------|-------------------------------------|
|                         | $\Delta CT_{\text{CntrlCB}}$                                                   | $\Delta CT_{\text{CntrlHP}}$ | $\Delta CT_{\text{ADCB}}$ | $\Delta CT_{\text{ADHP}}$ | $\Delta\Delta CT[\text{ADHP-CntrlHP}]$                                                    | $\Delta\Delta CT[\text{ADCB-CntrlCB}]$ | $\Delta\Delta CT[\text{ADHP-ADCB}]$ |
| hsa-miR-124-4373295     | 26.99                                                                          | 28.99                        | 27.01                     | 23.96                     | -5.04                                                                                     | 0.02                                   | -3.06                               |
| hsa-miR-194-4373106     | 27.97                                                                          | 31.97                        | 27.95                     | 27.98                     | -3.99                                                                                     | -0.01                                  | 0.02                                |
| hsa-miR-192-4373108     | 26.97                                                                          | 31.97                        | 26.98                     | 27.97                     | -4.00                                                                                     | 0.02                                   | 0.99                                |
| hsa-miR-187-4373307     | 32.02                                                                          | 31.98                        | 30.97                     | 27.93                     | -4.05                                                                                     | -1.05                                  | -3.04                               |
| hsa-miR-129-5p-4373171  | 30.00                                                                          | 30.01                        | 30.98                     | 24.96                     | -5.05                                                                                     | 0.98                                   | -6.03                               |
| hsa-let-7a-4373169      | 23.99                                                                          | 25.02                        | 23.99                     | 17.33                     | -7.69                                                                                     | 0.00                                   | -6.66                               |
| hsa-miR-202-4395474     | 34.10                                                                          | 32.93                        | 31.81                     | 28.96                     | -3.96                                                                                     | -2.29                                  | -2.85                               |
| hsa-miR-215-4373084     | 27.95                                                                          | 33.01                        | 28.89                     | 28.98                     | -4.02                                                                                     | 0.93                                   | 0.10                                |
| hsa-miR-148b-4373129    | 30.99                                                                          | 32.00                        | 29.97                     | 26.95                     | -5.05                                                                                     | -1.02                                  | -3.02                               |
| hsa-miR-133b-4395358    | 32.00                                                                          | 30.93                        | 32.02                     | 24.97                     | -5.96                                                                                     | 0.02                                   | -7.05                               |
| hsa-miR-449a-4373207    | 32.97                                                                          | 35.97                        | 32.99                     | 32.99                     | -2.99                                                                                     | 0.02                                   | 0.00                                |
| hsa-miR-135a-4373140    | 28.97                                                                          | 30.97                        | 28.99                     | 24.98                     | -5.99                                                                                     | 0.02                                   | -4.01                               |
| hsa-miR-429-4373203     | 40.00                                                                          | 35.99                        | 40.00                     | 32.97                     | -3.01                                                                                     | 0.00                                   | -7.03                               |
| hsa-miR-448-4373206     | 40.00                                                                          | 35.99                        | 40.00                     | 32.98                     | -3.01                                                                                     | 0.00                                   | -7.02                               |
| hsa-miR-130a-4373145    | 29.00                                                                          | 30.99                        | 27.98                     | 24.96                     | -6.03                                                                                     | -1.02                                  | -3.02                               |
| hsa-miR-106b-4373155    | 27.96                                                                          | 29.97                        | 27.97                     | 22.98                     | -6.99                                                                                     | 0.01                                   | -4.99                               |
| hsa-miR-155-4395459     | 17.39                                                                          | -3.83                        | 12.32                     | -18.65                    | -14.83                                                                                    | -5.06                                  | -30.98                              |
| hsa-miR-142-3p-4373136  | 30.95                                                                          | 31.99                        | 32.97                     | 25.97                     | -6.02                                                                                     | 2.01                                   | -7.00                               |
| hsa-miR-154-4373270     | 32.01                                                                          | 33.03                        | 33.00                     | 26.97                     | -6.06                                                                                     | 0.99                                   | -6.03                               |
| hsa-miR-130b-4373144    | 29.98                                                                          | 31.97                        | 29.00                     | 24.96                     | -7.01                                                                                     | -0.99                                  | -4.04                               |
| hsa-miR-377-4373025     | 40.00                                                                          | 35.98                        | 40.00                     | 32.00                     | -3.97                                                                                     | 0.00                                   | -8.00                               |
| hsa-miR-105-4395278     | 32.98                                                                          | 30.97                        | 31.98                     | 22.98                     | -7.99                                                                                     | -1.00                                  | -9.00                               |
| hsa-miR-10a-4373153     | 31.06                                                                          | 30.99                        | 30.99                     | 22.98                     | -8.01                                                                                     | -0.06                                  | -8.01                               |
| hsa-miR-302b-4378071    | 34.95                                                                          | 34.94                        | 33.99                     | 30.03                     | -4.91                                                                                     | -0.96                                  | -3.97                               |
| hsa-miR-196b-4395326    | 36.02                                                                          | 33.97                        | 34.98                     | 27.98                     | -6.00                                                                                     | -1.04                                  | -7.00                               |
| hsa-miR-190-4373110     | 31.95                                                                          | 33.98                        | 32.97                     | 27.96                     | -6.02                                                                                     | 1.01                                   | -5.00                               |
| hsa-miR-146b-3p-4395472 | 36.02                                                                          | 32.97                        | 34.98                     | 26.00                     | -6.97                                                                                     | -1.04                                  | -8.99                               |
| hsa-miR-18a-4395533     | 31.00                                                                          | 34.02                        | 32.01                     | 27.96                     | -6.07                                                                                     | 1.01                                   | -4.05                               |
| hsa-miR-107-4373154     | 29.99                                                                          | 31.94                        | 29.99                     | 22.98                     | -8.96                                                                                     | 0.00                                   | -7.01                               |
| hsa-miR-101-4395364     | 30.97                                                                          | 31.95                        | 30.98                     | 22.98                     | -8.98                                                                                     | 0.01                                   | -8.00                               |
| hsa-miR-135b-4395372    | 24.96                                                                          | 32.98                        | 24.96                     | 24.98                     | -8.00                                                                                     | 0.00                                   | 0.02                                |
| hsa-miR-125a-3p-4395310 | 31.96                                                                          | 32.97                        | 30.97                     | 23.96                     | -9.01                                                                                     | -0.99                                  | -7.01                               |
| hsa-miR-1-4395333       | 35.99                                                                          | 35.00                        | 35.98                     | 25.98                     | -9.02                                                                                     | -0.02                                  | -10.00                              |

Supplemental Table 1.

| MicroRNA ABI Assay ID   | $\Delta\text{CT} = (\text{Raw CT miRNA}) - (\text{Raw CT mean endogenous controls})$ |                                    |                                 |                                 | $\Delta\Delta\text{CT} = \Delta\text{CT}_{\text{brain region 1}} - \Delta\text{CT}_{\text{brain region 2}}$ |                                              |                                           |
|-------------------------|--------------------------------------------------------------------------------------|------------------------------------|---------------------------------|---------------------------------|-------------------------------------------------------------------------------------------------------------|----------------------------------------------|-------------------------------------------|
|                         | $\Delta\text{CT}_{\text{CntrlCB}}$                                                   | $\Delta\text{CT}_{\text{CntrlHP}}$ | $\Delta\text{CT}_{\text{ADCB}}$ | $\Delta\text{CT}_{\text{ADHP}}$ | $\Delta\Delta\text{CT}[\text{ADHP-CntrlHP}]$                                                                | $\Delta\Delta\text{CT}[\text{ADCB-CntrlCB}]$ | $\Delta\Delta\text{CT}[\text{ADHP-ADCB}]$ |
| hsa-miR-183-4395380     | 40.00                                                                                | 35.95                              | 36.25                           | 26.99                           | -8.96                                                                                                       | -3.75                                        | -9.26                                     |
| hsa-miR-182-4395445     | 40.00                                                                                | 35.95                              | 40.00                           | 26.99                           | -8.97                                                                                                       | 0.00                                         | -13.01                                    |
| hsa-miR-193a-3p-4395361 | 40.00                                                                                | 36.87                              | 40.00                           | 27.97                           | -8.90                                                                                                       | 0.00                                         | -12.03                                    |
| hsa-miR-136-4373173     | 36.95                                                                                | 36.00                              | 35.14                           | 24.98                           | -11.02                                                                                                      | -1.81                                        | -10.16                                    |
| hsa-miR-153-4373305     | 35.98                                                                                | 37.03                              | 40.00                           | 26.97                           | -10.07                                                                                                      | 4.02                                         | -13.03                                    |
| hsa-miR-508-5p-4395203  | 40.00                                                                                | 40.00                              | 40.00                           | 37.38                           | -2.62                                                                                                       | 0.00                                         | -2.62                                     |
| hsa-miR-508-3p-4373233  | 36.00                                                                                | 40.00                              | 40.00                           | 36.96                           | -3.04                                                                                                       | 4.00                                         | -3.04                                     |
| hsa-miR-507-4373232     | 40.00                                                                                | 40.00                              | 37.28                           | 36.20                           | -3.80                                                                                                       | -2.72                                        | -1.08                                     |
| hsa-miR-506-4373231     | 40.00                                                                                | 40.00                              | 40.00                           | 36.09                           | -3.91                                                                                                       | 0.00                                         | -3.91                                     |
| hsa-miR-503-4373228     | 40.00                                                                                | 40.00                              | 40.00                           | 36.02                           | -3.98                                                                                                       | 0.00                                         | -3.98                                     |
| hsa-miR-501-3p-4395546  | 30.80                                                                                | 40.00                              | 40.00                           | 35.99                           | -4.01                                                                                                       | 9.20                                         | -4.01                                     |
| hsa-miR-499-3p-4395538  | 40.00                                                                                | 40.00                              | 40.00                           | 35.97                           | -4.03                                                                                                       | 0.00                                         | -4.03                                     |
| hsa-miR-492-4373217     | 40.00                                                                                | 40.00                              | 40.00                           | 34.98                           | -5.02                                                                                                       | 0.00                                         | -5.02                                     |
| hsa-miR-491-3p-4395471  | 40.00                                                                                | 40.00                              | 34.00                           | 34.87                           | -5.13                                                                                                       | -6.00                                        | 0.87                                      |
| hsa-miR-486-3p-4395204  | 29.98                                                                                | 40.00                              | 29.94                           | 34.04                           | -5.96                                                                                                       | -0.05                                        | 4.11                                      |
| hsa-miR-453-4395429     | 40.00                                                                                | 40.00                              | 40.00                           | 33.99                           | -6.01                                                                                                       | 0.00                                         | -6.01                                     |
| hsa-miR-450b-3p-4395319 | 40.00                                                                                | 40.00                              | 40.00                           | 33.86                           | -6.14                                                                                                       | 0.00                                         | -6.14                                     |
| hsa-miR-450a-4395414    | 40.00                                                                                | 40.00                              | 40.00                           | 33.00                           | -7.00                                                                                                       | 0.00                                         | -7.00                                     |
| hsa-miR-431-4395173     | 36.00                                                                                | 40.00                              | 33.34                           | 32.98                           | -7.02                                                                                                       | -2.66                                        | -0.36                                     |
| hsa-miR-424-4373201     | 40.00                                                                                | 40.00                              | 40.00                           | 32.96                           | -7.04                                                                                                       | 0.00                                         | -7.04                                     |
| hsa-miR-412-4373199     | 36.04                                                                                | 40.00                              | 40.00                           | 32.96                           | -7.04                                                                                                       | 3.96                                         | -7.04                                     |
| hsa-miR-384-4373017     | 40.00                                                                                | 40.00                              | 40.00                           | 32.07                           | -7.93                                                                                                       | 0.00                                         | -7.93                                     |
| hsa-miR-380-4373022     | 30.20                                                                                | 40.00                              | 30.85                           | 32.01                           | -7.99                                                                                                       | 0.65                                         | 1.16                                      |
| hsa-miR-376b-4373196    | 40.00                                                                                | 40.00                              | 40.00                           | 32.00                           | -8.00                                                                                                       | 0.00                                         | -8.00                                     |
| hsa-miR-373-4378073     | 40.00                                                                                | 40.00                              | 40.00                           | 31.99                           | -8.01                                                                                                       | 0.00                                         | -8.01                                     |
| hsa-miR-372-4373029     | 35.97                                                                                | 40.00                              | 35.96                           | 31.98                           | -8.02                                                                                                       | -0.02                                        | -3.98                                     |
| hsa-miR-371-3p-4395235  | 40.00                                                                                | 40.00                              | 40.00                           | 31.98                           | -8.02                                                                                                       | 0.00                                         | -8.02                                     |
| hsa-miR-369-5p-4373195  | 35.98                                                                                | 40.00                              | 34.98                           | 31.97                           | -8.03                                                                                                       | -1.00                                        | -3.01                                     |
| hsa-miR-369-3p-4373032  | 34.97                                                                                | 40.00                              | 35.97                           | 31.97                           | -8.03                                                                                                       | 0.99                                         | -3.99                                     |
| hsa-miR-367-4373034     | 40.00                                                                                | 40.00                              | 32.95                           | 31.97                           | -8.03                                                                                                       | -7.05                                        | -0.98                                     |
| hsa-miR-362-3p-4395228  | 33.95                                                                                | 40.00                              | 34.98                           | 31.96                           | -8.04                                                                                                       | 1.03                                         | -3.02                                     |
| hsa-miR-33b-4395196     | 40.00                                                                                | 40.00                              | 24.87                           | 30.99                           | -9.01                                                                                                       | -15.13                                       | 6.12                                      |
| hsa-miR-32-4395220      | 40.00                                                                                | 40.00                              | 40.00                           | 30.95                           | -9.05                                                                                                       | 0.00                                         | -9.05                                     |

Supplemental Table 1.

| MicroRNA ABI Assay ID    | $\Delta CT = (\text{Raw CT miRNA}) - (\text{Raw CT mean endogenous controls})$ |                              |                           |                           | $\Delta\Delta CT = \Delta CT_{\text{brain region 1}} - \Delta CT_{\text{brain region 2}}$ |                                        |                                     |
|--------------------------|--------------------------------------------------------------------------------|------------------------------|---------------------------|---------------------------|-------------------------------------------------------------------------------------------|----------------------------------------|-------------------------------------|
|                          | $\Delta CT_{\text{CntrlCB}}$                                                   | $\Delta CT_{\text{CntrlHP}}$ | $\Delta CT_{\text{ADCB}}$ | $\Delta CT_{\text{ADHP}}$ | $\Delta\Delta CT[\text{ADHP-CntrlHP}]$                                                    | $\Delta\Delta CT[\text{ADCB-CntrlCB}]$ | $\Delta\Delta CT[\text{ADHP-ADCB}]$ |
| hsa-miR-302c-4378072     | 40.00                                                                          | 40.00                        | 35.96                     | 30.05                     | -9.95                                                                                     | -4.04                                  | -5.91                               |
| hsa-miR-302a-4378070     | 33.96                                                                          | 40.00                        | 33.96                     | 30.02                     | -9.98                                                                                     | 0.00                                   | -3.94                               |
| hsa-miR-301b-4395503     | 33.97                                                                          | 40.00                        | 33.99                     | 30.02                     | -9.98                                                                                     | 0.02                                   | -3.97                               |
| hsa-miR-299-3p-4373189   | 29.60                                                                          | 40.00                        | 35.99                     | 29.99                     | -10.01                                                                                    | 6.39                                   | -6.00                               |
| hsa-miR-298-4395301      | 40.00                                                                          | 40.00                        | 40.00                     | 29.99                     | -10.01                                                                                    | 0.00                                   | -10.01                              |
| hsa-miR-296-3p-4395212   | 40.00                                                                          | 40.00                        | 40.00                     | 29.98                     | -10.02                                                                                    | 0.00                                   | -10.02                              |
| hsa-miR-220c-4395322     | 40.00                                                                          | 40.00                        | 40.00                     | 29.70                     | -10.30                                                                                    | 0.00                                   | -10.30                              |
| hsa-miR-220-4373078      | 40.00                                                                          | 40.00                        | 40.00                     | 29.04                     | -10.96                                                                                    | 0.00                                   | -10.96                              |
| hsa-miR-219-1-3p-4395206 | 40.00                                                                          | 40.00                        | 40.00                     | 29.01                     | -10.99                                                                                    | 0.00                                   | -10.99                              |
| hsa-miR-217-4395448      | 40.00                                                                          | 40.00                        | 40.00                     | 28.99                     | -11.01                                                                                    | 0.00                                   | -11.01                              |
| hsa-miR-216b-4395437     | 40.00                                                                          | 40.00                        | 24.62                     | 28.99                     | -11.01                                                                                    | -15.38                                 | 4.37                                |
| hsa-miR-216a-4395331     | 40.00                                                                          | 40.00                        | 40.00                     | 28.99                     | -11.01                                                                                    | 0.00                                   | -11.01                              |
| hsa-miR-205-4373093      | 40.00                                                                          | 40.00                        | 23.51                     | 28.97                     | -11.03                                                                                    | -16.49                                 | 5.46                                |
| hsa-miR-199b-5p-4373100  | 40.00                                                                          | 40.00                        | 40.00                     | 28.02                     | -11.98                                                                                    | 0.00                                   | -11.98                              |
| hsa-miR-199a-5p-4373272  | 40.00                                                                          | 40.00                        | 40.00                     | 27.99                     | -12.01                                                                                    | 0.00                                   | -12.01                              |
| hsa-miR-198-4395384      | 40.00                                                                          | 40.00                        | 40.00                     | 27.98                     | -12.02                                                                                    | 0.00                                   | -12.02                              |
| hsa-miR-18b-4395328      | 40.00                                                                          | 40.00                        | 40.00                     | 27.96                     | -12.04                                                                                    | 0.00                                   | -12.04                              |
| hsa-miR-188-3p-4395217   | 35.92                                                                          | 40.00                        | 40.00                     | 27.95                     | -12.05                                                                                    | 4.08                                   | -12.05                              |
| hsa-miR-147b-4395373     | 40.00                                                                          | 40.00                        | 22.38                     | 26.94                     | -13.06                                                                                    | -17.62                                 | 4.56                                |
| hsa-miR-147-4373131      | 35.98                                                                          | 40.00                        | 40.00                     | 26.26                     | -13.74                                                                                    | 4.02                                   | -13.74                              |
| hsa-miR-142-5p-4395359   | 40.00                                                                          | 40.00                        | 34.05                     | 25.97                     | -14.03                                                                                    | -5.96                                  | -8.08                               |
| hsa-miR-141-4373137      | 35.99                                                                          | 40.00                        | 36.00                     | 25.97                     | -14.03                                                                                    | 0.01                                   | -10.04                              |
| hsa-miR-127-5p-4395340   | 40.00                                                                          | 40.00                        | 26.46                     | 24.01                     | -15.99                                                                                    | -13.54                                 | -2.45                               |
| hsa-miR-122-4395356      | 33.86                                                                          | 40.00                        | 33.99                     | 23.95                     | -16.05                                                                                    | 0.12                                   | -10.04                              |
| hsa-miR-10b-4395329      | 36.00                                                                          | 40.00                        | 35.97                     | 23.95                     | -16.05                                                                                    | -0.03                                  | -12.02                              |

Supplemental Table 1.

| MicroRNA ABI Assay ID         | relative quantification (RQ) = 2 <sup>-ΔΔCT</sup> |                                     |                                     |                                  |                                        |
|-------------------------------|---------------------------------------------------|-------------------------------------|-------------------------------------|----------------------------------|----------------------------------------|
|                               | ΔΔCT[CntrlHP-CntrlCB]                             | 2 <sup>Δ</sup> - ΔΔCT[ADHP-CntrlHP] | 2 <sup>Δ</sup> - ΔΔCT[ADCB-CntrlCB] | 2 <sup>Δ</sup> - ΔΔCT[ADHP-ADCB] | 2 <sup>Δ</sup> - ΔΔCT[CntrlHP-CntrlCB] |
| <b>MammU6-4395470</b>         |                                                   |                                     |                                     |                                  |                                        |
| <b>RNU44-4373384</b>          |                                                   |                                     |                                     |                                  |                                        |
| <b>RNU48-4373383</b>          |                                                   |                                     |                                     |                                  |                                        |
| <b>MeanEndogenousControls</b> |                                                   |                                     |                                     |                                  |                                        |
| ath-miR159a-4373390           |                                                   |                                     |                                     |                                  |                                        |
| hsa-miR-98-4373009            | 0.02                                              | 0.00                                | 2.17                                | 0.00                             | 1.96                                   |
| hsa-miR-501-5p-4373226        | 0.30                                              | 0.00                                | 11.60                               | 0.00                             | 1.49                                   |
| hsa-miR-342-3p-4395371        | 1.00                                              | 0.00                                | 5.58                                | 0.00                             | 0.74                                   |
| hsa-miR-331-3p-4373046        | 0.99                                              | 0.00                                | 2.03                                | 0.00                             | 0.74                                   |
| hsa-miR-328-4373049           | 0.02                                              | 0.00                                | 0.72                                | 0.00                             | 1.96                                   |
| hsa-miR-370-4395386           | -0.01                                             | 0.01                                | 0.74                                | 0.01                             | 2.02                                   |
| hsa-miR-204-4373094           | 0.96                                              | 0.00                                | 2.00                                | 0.00                             | 0.76                                   |
| hsa-miR-211-4373088           | -0.02                                             | 0.00                                | 0.00                                | 122522.16                        | 2.04                                   |
| hsa-miR-330-3p-4373047        | -1.09                                             | 0.04                                | 5.83                                | 0.04                             | 5.94                                   |
| hsa-miR-191-4395410           | 0.00                                              | 0.01                                | 1.96                                | 0.01                             | 2.00                                   |
| hsa-miR-346-4373038           | -0.08                                             | 0.10                                | 14.32                               | 0.01                             | 2.17                                   |
| hsa-miR-149-4395366           | 0.03                                              | 0.04                                | 1.99                                | 0.04                             | 1.94                                   |
| hsa-miR-139-5p-4395400        | -4.01                                             | 0.04                                | 1.99                                | 2.05                             | 110.11                                 |
| hsa-miR-208b-4395401          | -14.09                                            | 0.09                                | 14219817.96                         | 0.02                             | 2629612.83                             |
| hsa-miR-138-4395395           | -3.03                                             | 0.09                                | 2.00                                | 1.95                             | 41.20                                  |
| hsa-miR-132-4373143           | -2.03                                             | 0.27                                | 2.05                                | 1.98                             | 15.15                                  |
| hsa-miR-184-4373113           | -4.01                                             | 0.70                                | 5.55                                | 14.03                            | 110.54                                 |
| hsa-miR-126-4395339           | -0.01                                             | 0.73                                | 2.00                                | 0.74                             | 2.02                                   |
| hsa-miR-181c-4373115          | 1.04                                              | 40.42                               | 0.71                                | 40.52                            | 0.71                                   |
| hsa-miR-152-4395170           | 0.00                                              | 40.69                               | 5.54                                | 14.72                            | 2.00                                   |
| hsa-miR-15a-4373123           | 4.07                                              | 868.48                              | 1.93                                | 15.37                            | 0.03                                   |
| hsa-miR-9-4373285             | 2.01                                              | 0.00                                | 1.96                                | 0.00                             | 0.27                                   |
| hsa-miR-99a-4373008           | -0.01                                             | 0.00                                | 1.99                                | 0.00                             | 2.01                                   |
| hsa-miR-99b-4373007           | -0.01                                             | 0.00                                | 5.60                                | 0.00                             | 2.03                                   |
| hsa-miR-885-5p-4395407        | 1.99                                              | 0.00                                | 2.05                                | 0.00                             | 0.27                                   |
| hsa-miR-539-4378103           | -0.01                                             | 0.00                                | 1.97                                | 0.00                             | 2.02                                   |
| hsa-miR-886-3p-4395305        | -2.04                                             | 0.00                                | 2.06                                | 0.00                             | 15.39                                  |
| hsa-miR-574-3p-4395460        | -2.00                                             | 0.00                                | 5.75                                | 0.00                             | 14.79                                  |
| hsa-miR-744-4395435           | -0.99                                             | 0.00                                | 1.97                                | 0.00                             | 5.36                                   |
| hsa-miR-95-4373011            | 1.01                                              | 0.00                                | 1.99                                | 0.00                             | 0.73                                   |
| hsa-miR-92a-4395169           | -1.01                                             | 0.00                                | 2.03                                | 0.00                             | 5.49                                   |
| hsa-miR-708-4395452           | -2.02                                             | 0.00                                | 5.54                                | 0.00                             | 15.00                                  |
| hsa-miR-874-4395379           | 0.98                                              | 0.00                                | 5.60                                | 0.00                             | 0.75                                   |
| hsa-miR-886-5p-4395304        | -2.01                                             | 0.00                                | 1.95                                | 0.00                             | 14.86                                  |

Supplemental Table 1.

| MicroRNA ABI Assay ID   | relative quantification (RQ) = 2 <sup>-</sup> ΔΔCT |                                     |                                     |                                  |                                        |
|-------------------------|----------------------------------------------------|-------------------------------------|-------------------------------------|----------------------------------|----------------------------------------|
|                         | ΔΔCT[CntrlHP-CntrlCB]                              | 2 <sup>Δ</sup> - ΔΔCT[ADHP-CntrlHP] | 2 <sup>Δ</sup> - ΔΔCT[ADCB-CntrlCB] | 2 <sup>Δ</sup> - ΔΔCT[ADHP-ADCB] | 2 <sup>Δ</sup> - ΔΔCT[CntrlHP-CntrlCB] |
| hsa-miR-93-4373302      | -1.01                                              | 0.00                                | 5.53                                | 0.00                             | 5.48                                   |
| hsa-miR-532-3p-4395466  | 0.99                                               | 0.00                                | 2.04                                | 0.00                             | 0.74                                   |
| hsa-miR-548d-3p-4381008 | -11.27                                             | 0.00                                | 2.00                                | 2.00                             | 156975.84                              |
| hsa-miR-576-5p-4395461  | -4.14                                              | 0.00                                | 0.00                                | 2.00                             | 125.19                                 |
| hsa-miR-887-4395485     | -0.15                                              | 0.00                                | 0.00                                | 2.00                             | 2.32                                   |
| hsa-miR-628-5p-4395544  | 1.01                                               | 0.00                                | 0.72                                | 0.00                             | 0.73                                   |
| hsa-miR-598-4395179     | 0.99                                               | 0.00                                | 1.99                                | 0.00                             | 0.75                                   |
| hsa-miR-532-5p-4380928  | 2.02                                               | 0.00                                | 2.01                                | 0.00                             | 0.27                                   |
| hsa-miR-655-4381015     | 1.01                                               | 0.00                                | 1.97                                | 0.00                             | 0.73                                   |
| hsa-miR-660-4380925     | 1.99                                               | 0.00                                | 2.05                                | 0.00                             | 0.27                                   |
| hsa-miR-671-3p-4395433  | 0.01                                               | 0.00                                | 0.73                                | 0.00                             | 1.99                                   |
| hsa-miR-652-4395463     | 0.04                                               | 0.00                                | 1.94                                | 0.00                             | 1.93                                   |
| hsa-miR-616-4395525     | -2.90                                              | 0.00                                | 0.01                                | 2.00                             | 36.48                                  |
| hsa-miR-590-5p-4395176  | 2.02                                               | 0.00                                | 1.98                                | 0.00                             | 0.27                                   |
| hsa-miR-625-4395542     | 1.97                                               | 0.00                                | 2.03                                | 0.00                             | 0.28                                   |
| hsa-miR-642-4380995     | -1.98                                              | 0.00                                | 5.33                                | 0.00                             | 14.54                                  |
| hsa-miR-541-4395312     | -1.98                                              | 0.00                                | 1.95                                | 0.00                             | 14.51                                  |
| hsa-miR-758-4395180     | 0.02                                               | 0.00                                | 5.54                                | 0.00                             | 1.96                                   |
| hsa-miR-519d-4395514    | -1.89                                              | 0.00                                | 4.56                                | 0.00                             | 13.21                                  |
| hsa-miR-891a-4395302    | 0.99                                               | 0.00                                | 2.03                                | 0.00                             | 0.74                                   |
| hsa-miR-889-4395313     | 2.02                                               | 0.00                                | 1.99                                | 0.00                             | 0.26                                   |
| hsa-miR-636-4395199     | -0.96                                              | 0.00                                | 1.96                                | 0.00                             | 5.21                                   |
| hsa-miR-518d-3p-4373248 | -0.94                                              | 0.00                                | 0.00                                | 2.00                             | 5.11                                   |
| hsa-miR-512-3p-4381034  | -6.92                                              | 0.00                                | 111.32                              | 0.04                             | 2019.38                                |
| hsa-miR-582-3p-4395510  | 0.61                                               | 0.00                                | 0.28                                | 0.01                             | 1.09                                   |
| hsa-miR-519a-4395526    | -2.10                                              | 0.00                                | 15.55                               | 0.00                             | 16.39                                  |
| hsa-miR-548d-5p-4395348 | -1.00                                              | 0.00                                | 1.96                                | 0.01                             | 5.45                                   |
| hsa-miR-548b-5p-4395519 | -6.03                                              | 0.00                                | 114.50                              | 0.03                             | 830.18                                 |
| hsa-miR-511-4373236     | -6.03                                              | 0.00                                | 2.00                                | 2.00                             | 827.53                                 |
| hsa-miR-597-4380960     | 1.02                                               | 0.00                                | 2.02                                | 0.00                             | 0.72                                   |
| hsa-miR-522-4395524     | -0.98                                              | 0.00                                | 0.01                                | 2.00                             | 5.31                                   |
| hsa-miR-654-5p-4381014  | 0.99                                               | 0.01                                | 0.86                                | 0.00                             | 0.75                                   |
| hsa-miR-518d-5p-4395500 | -5.64                                              | 0.01                                | 2.00                                | 2.00                             | 562.64                                 |
| hsa-miR-518e-4395506    | 0.71                                               | 0.01                                | 2.65                                | 0.00                             | 0.98                                   |
| hsa-miR-517c-4373264    | -0.06                                              | 0.01                                | 5.54                                | 0.00                             | 2.13                                   |
| hsa-miR-542-3p-4378101  | -5.04                                              | 0.01                                | 251.68                              | 0.02                             | 308.51                                 |
| hsa-miR-876-3p-4395336  | -5.02                                              | 0.01                                | 2.00                                | 2.00                             | 303.34                                 |
| hsa-miR-548c-5p-4395540 | -0.99                                              | 0.01                                | 0.04                                | 2.00                             | 5.38                                   |
| hsa-miR-561-4380938     | -4.56                                              | 0.02                                | 2.00                                | 2.00                             | 192.01                                 |



Supplemental Table 1.

| MicroRNA ABI Assay ID   | relative quantification (RQ) = 2 <sup>-</sup> ΔΔCT |                                     |                                     |                                  |                                        |
|-------------------------|----------------------------------------------------|-------------------------------------|-------------------------------------|----------------------------------|----------------------------------------|
|                         | ΔΔCT[CntrlHP-CntrlCB]                              | 2 <sup>Δ</sup> - ΔΔCT[ADHP-CntrlHP] | 2 <sup>Δ</sup> - ΔΔCT[ADCB-CntrlCB] | 2 <sup>Δ</sup> - ΔΔCT[ADHP-ADCB] | 2 <sup>Δ</sup> - ΔΔCT[CntrlHP-CntrlCB] |
| hsa-miR-556-5p-4395455  | -4.26                                              | 0.03                                | 2.00                                | 2.00                             | 141.42                                 |
| hsa-miR-509-5p-4395346  | -4.12                                              | 0.03                                | 6827.04                             | 0.00                             | 122.63                                 |
| hsa-miR-589-4395520     | 1.97                                               | 0.03                                | 2.01                                | 0.00                             | 0.28                                   |
| hsa-miR-548a-3p-4380948 | -4.04                                              | 0.04                                | 113.09                              | 0.04                             | 113.57                                 |
| hsa-miR-618-4380996     | 1.00                                               | 0.04                                | 14.89                               | 0.00                             | 0.74                                   |
| hsa-miR-888-4395323     | 2.02                                               | 0.04                                | 2.00                                | 0.00                             | 0.26                                   |
| hsa-miR-517a-4395513    | 0.99                                               | 0.04                                | 5.60                                | 0.00                             | 0.75                                   |
| hsa-miR-325-4373051     | -33.72                                             | 0.00                                | 2.00                                | 16798.54                         | 880972194929269.00                     |
| hsa-miR-337-5p-4395267  | -17.82                                             | 0.00                                | 1.97                                | 15.03                            | 109140563.26                           |
| hsa-miR-495-4381078     | 1.01                                               | 0.00                                | 0.72                                | 0.00                             | 0.73                                   |
| hsa-miR-491-5p-4381053  | -2.03                                              | 0.00                                | 5.62                                | 0.00                             | 15.19                                  |
| hsa-miR-484-4381032     | 2.00                                               | 0.00                                | 2.01                                | 0.00                             | 0.27                                   |
| hsa-miR-504-4395195     | -4.07                                              | 0.00                                | 15.19                               | 0.04                             | 116.92                                 |
| hsa-miR-499-5p-4381047  | -10.12                                             | 0.00                                | 7312.55                             | 0.03                             | 49868.62                               |
| hsa-miR-485-3p-4378095  | -1.03                                              | 0.00                                | 2.01                                | 0.00                             | 5.58                                   |
| hsa-miR-505-4395200     | 0.00                                               | 0.01                                | 5.36                                | 0.00                             | 2.00                                   |
| hsa-miR-450b-5p-4395318 | -13.25                                             | 0.00                                | 2.00                                | 878.00                           | 1136140.08                             |
| hsa-miR-502-5p-4373227  | -0.90                                              | 0.01                                | 2.12                                | 0.03                             | 4.92                                   |
| hsa-miR-487b-4378102    | 0.00                                               | 0.01                                | 2.01                                | 0.01                             | 2.00                                   |
| hsa-miR-433-4373205     | -1.01                                              | 0.00                                | 0.73                                | 0.04                             | 5.46                                   |
| hsa-miR-222-4395387     | -4.01                                              | 0.00                                | 5.48                                | 0.01                             | 110.05                                 |
| hsa-miR-485-5p-4373212  | 0.04                                               | 0.01                                | 2.02                                | 0.01                             | 1.93                                   |
| hsa-miR-454-4395434     | 3.00                                               | 0.01                                | 2.00                                | 0.00                             | 0.10                                   |
| hsa-miR-494-4395476     | 1.00                                               | 0.03                                | 2.01                                | 0.01                             | 0.73                                   |
| hsa-miR-486-5p-4378096  | 0.08                                               | 0.02                                | 1.99                                | 0.02                             | 1.85                                   |
| hsa-miR-30c-4373060     | 2.00                                               | 0.00                                | 2.01                                | 0.00                             | 0.27                                   |
| hsa-miR-382-4373019     | 0.03                                               | 0.00                                | 1.97                                | 0.00                             | 1.95                                   |
| hsa-miR-374b-4381045    | 0.99                                               | 0.00                                | 0.73                                | 0.00                             | 0.74                                   |
| hsa-miR-24-4373072      | 0.00                                               | 0.00                                | 1.97                                | 0.00                             | 2.01                                   |
| hsa-miR-425-4380926     | -0.01                                              | 0.01                                | 1.93                                | 0.01                             | 2.01                                   |
| hsa-miR-488-4395468     | -1.02                                              | 0.05                                | 0.74                                | 0.34                             | 5.52                                   |
| hsa-miR-500-4395539     | 3.02                                               | 0.10                                | 0.72                                | 0.01                             | 0.10                                   |
| hsa-miR-320-4395388     | 2.00                                               | 0.01                                | 2.04                                | 0.00                             | 0.27                                   |
| hsa-miR-483-5p-4395449  | -1.00                                              | 0.03                                | 2.03                                | 0.09                             | 5.43                                   |
| hsa-miR-383-4373018     | 0.97                                               | 0.01                                | 2.01                                | 0.00                             | 0.76                                   |
| hsa-miR-451-4373360     | -0.02                                              | 0.04                                | 5.43                                | 0.01                             | 2.05                                   |

Supplemental Table 1.

| MicroRNA ABI Assay ID  | relative quantification (RQ) = $2^{-\Delta\Delta CT}$ |                                               |                                               |                                            |                                                  |
|------------------------|-------------------------------------------------------|-----------------------------------------------|-----------------------------------------------|--------------------------------------------|--------------------------------------------------|
|                        | $\Delta\Delta CT$ [CntrlHP-CntrlCB]                   | $2^{\Delta} - \Delta\Delta CT$ [ADHP-CntrlHP] | $2^{\Delta} - \Delta\Delta CT$ [ADCB-CntrlCB] | $2^{\Delta} - \Delta\Delta CT$ [ADHP-ADCB] | $2^{\Delta} - \Delta\Delta CT$ [CntrlHP-CntrlCB] |
| hsa-miR-30b-4373290    | 1.00                                                  | 0.00                                          | 5.45                                          | 0.00                                       | 0.74                                             |
| hsa-miR-29a-4395223    | -0.01                                                 | 0.00                                          | 5.58                                          | 0.00                                       | 2.03                                             |
| hsa-miR-26a-4395166    | 2.01                                                  | 0.00                                          | 2.00                                          | 0.00                                       | 0.27                                             |
| hsa-miR-34a-4395168    | 0.02                                                  | 0.02                                          | 1.98                                          | 0.02                                       | 1.97                                             |
| hsa-miR-411-4381013    | 2.02                                                  | 0.04                                          | 0.71                                          | 0.01                                       | 0.26                                             |
| hsa-miR-410-4378093    | 1.02                                                  | 0.04                                          | 0.73                                          | 0.04                                       | 0.72                                             |
| hsa-miR-490-3p-4373215 | -7.97                                                 | 0.12                                          | 68005.73                                      | 0.01                                       | 5804.26                                          |
| hsa-miR-223-4395406    | -1.01                                                 | 0.01                                          | 5.36                                          | 0.01                                       | 5.48                                             |
| hsa-miR-374a-4373028   | 0.98                                                  | 0.04                                          | 0.72                                          | 0.04                                       | 0.75                                             |
| hsa-miR-376c-4395233   | 3.01                                                  | 0.04                                          | 1.97                                          | 0.00                                       | 0.10                                             |
| hsa-miR-365-4373194    | 1.04                                                  | 0.04                                          | 1.95                                          | 0.01                                       | 0.71                                             |
| hsa-miR-455-3p-4395355 | 3.02                                                  | 0.10                                          | 1.95                                          | 0.00                                       | 0.10                                             |
| hsa-miR-323-3p-4395338 | 1.00                                                  | 0.04                                          | 1.96                                          | 0.01                                       | 0.73                                             |
| hsa-miR-23a-4373074    | -14.19                                                | 0.03                                          | 2.00                                          | 45690.57                                   | 2921615.23                                       |
| hsa-miR-376a-4373026   | 0.99                                                  | 0.10                                          | 2.02                                          | 0.04                                       | 0.75                                             |
| hsa-miR-375-4373027    | -2.01                                                 | 0.10                                          | 1.98                                          | 0.73                                       | 14.88                                            |
| hsa-miR-218-4373081    | 3.03                                                  | 0.04                                          | 1.95                                          | 0.00                                       | 0.10                                             |
| hsa-miR-379-4373349    | 2.04                                                  | 0.10                                          | 1.99                                          | 0.01                                       | 0.26                                             |
| hsa-miR-31-4395390     | 4.00                                                  | 0.06                                          | 5.41                                          | 0.00                                       | 0.04                                             |
| hsa-miR-496-4386771    | -5.69                                                 | 0.38                                          | 105.47                                        | 2.16                                       | 590.60                                           |
| hsa-miR-197-4373102    | 0.00                                                  | 0.04                                          | 2.07                                          | 0.04                                       | 2.01                                             |
| hsa-miR-345-4395297    | 0.99                                                  | 0.10                                          | 5.61                                          | 0.01                                       | 0.74                                             |
| hsa-miR-324-5p-4373052 | -0.02                                                 | 0.10                                          | 2.00                                          | 0.10                                       | 2.04                                             |
| hsa-miR-339-3p-4395295 | 0.99                                                  | 0.10                                          | 1.99                                          | 0.04                                       | 0.74                                             |
| hsa-miR-339-5p-4395368 | -0.05                                                 | 0.10                                          | 0.77                                          | 0.27                                       | 2.10                                             |
| hsa-miR-489-4395469    | -2.09                                                 | 0.32                                          | 6.01                                          | 0.86                                       | 16.25                                            |
| hsa-miR-26b-4395167    | 2.00                                                  | 0.10                                          | 2.02                                          | 0.01                                       | 0.27                                             |
| hsa-miR-221-4373077    | -3.96                                                 | 0.11                                          | 1.96                                          | 5.62                                       | 104.76                                           |
| hsa-miR-487a-4378097   | 0.00                                                  | 0.40                                          | 1.98                                          | 0.40                                       | 2.00                                             |
| hsa-miR-423-5p-4395451 | 0.06                                                  | 0.28                                          | 5.36                                          | 0.10                                       | 1.89                                             |
| hsa-miR-193b-4395478   | -0.98                                                 | 0.10                                          | 0.73                                          | 0.74                                       | 5.35                                             |
| hsa-miR-34c-5p-4373036 | -6.02                                                 | 0.28                                          | 5.43                                          | 42.66                                      | 825.22                                           |
| hsa-miR-181a-4373117   | -1.02                                                 | 0.10                                          | 1.99                                          | 0.27                                       | 5.52                                             |

Supplemental Table 1.

| MicroRNA ABI Assay ID    | relative quantification (RQ) = 2 <sup>-ΔΔCT</sup> |                                     |                                     |                                  |                                        |
|--------------------------|---------------------------------------------------|-------------------------------------|-------------------------------------|----------------------------------|----------------------------------------|
|                          | ΔΔCT[CntrlHP-CntrlCB]                             | 2 <sup>Δ</sup> - ΔΔCT[ADHP-CntrlHP] | 2 <sup>Δ</sup> - ΔΔCT[ADCB-CntrlCB] | 2 <sup>Δ</sup> - ΔΔCT[ADHP-ADCB] | 2 <sup>Δ</sup> - ΔΔCT[CntrlHP-CntrlCB] |
| hsa-miR-19b-4373098      | 0.99                                              | 0.14                                | 2.04                                | 0.05                             | 0.74                                   |
| hsa-miR-502-3p-4395194   | 0.99                                              | 0.72                                | 5.54                                | 0.10                             | 0.74                                   |
| hsa-miR-340-4395369      | 1.01                                              | 0.27                                | 2.00                                | 0.10                             | 0.73                                   |
| hsa-miR-145-4395389      | -0.01                                             | 0.10                                | 2.05                                | 0.10                             | 2.02                                   |
| hsa-miR-324-3p-4395272   | 0.98                                              | 0.28                                | 2.04                                | 0.10                             | 0.75                                   |
| hsa-miR-342-5p-4395258   | 1.06                                              | 0.28                                | 1.98                                | 0.10                             | 0.69                                   |
| hsa-miR-28-3p-4395557    | 0.98                                              | 0.26                                | 5.60                                | 0.04                             | 0.75                                   |
| hsa-miR-20a-4373286      | 0.00                                              | 0.27                                | 2.00                                | 0.27                             | 2.00                                   |
| hsa-miR-210-4373089      | -0.07                                             | 0.27                                | 2.16                                | 0.27                             | 2.15                                   |
| hsa-miR-150-4373127      | 0.02                                              | 0.27                                | 1.95                                | 0.28                             | 1.95                                   |
| hsa-miR-16-4373121       | 2.01                                              | 0.28                                | 2.01                                | 0.04                             | 0.27                                   |
| hsa-miR-361-5p-4373035   | 1.01                                              | 0.76                                | 0.73                                | 0.76                             | 0.73                                   |
| hsa-miR-409-5p-4395442   | 0.01                                              | 0.87                                | 2.01                                | 0.86                             | 1.99                                   |
| hsa-miR-335-4373045      | 0.00                                              | 0.73                                | 2.02                                | 0.72                             | 2.00                                   |
| hsa-miR-331-5p-4395344   | -0.94                                             | 0.77                                | 1.93                                | 2.04                             | 5.10                                   |
| hsa-miR-27b-4373068      | 1.02                                              | 0.73                                | 1.98                                | 0.27                             | 0.72                                   |
| hsa-miR-219-2-3p-4395501 | -2.04                                             | 0.69                                | 2.02                                | 5.27                             | 15.39                                  |
| hsa-miR-186-4395396      | 0.99                                              | 0.62                                | 2.01                                | 0.23                             | 0.74                                   |
| hsa-miR-212-4373087      | -1.00                                             | 0.74                                | 0.73                                | 5.46                             | 5.43                                   |
| hsa-miR-195-4373105      | 2.98                                              | 0.72                                | 2.03                                | 0.04                             | 0.10                                   |
| hsa-miR-17-4395419       | 0.01                                              | 0.73                                | 1.99                                | 0.72                             | 1.98                                   |
| hsa-miR-125b-4373148     | 0.00                                              | 0.74                                | 5.64                                | 0.26                             | 1.99                                   |
| hsa-miR-29c-4395171      | 1.99                                              | 1.94                                | 2.04                                | 0.26                             | 0.27                                   |
| hsa-miR-127-3p-4373147   | -0.03                                             | 1.95                                | 2.01                                | 2.00                             | 2.06                                   |
| hsa-miR-25-4373071       | 0.00                                              | 1.97                                | 5.48                                | 0.72                             | 1.99                                   |
| hsa-miR-455-5p-4378098   | 5.01                                              | 1.98                                | 5.43                                | 0.00                             | 0.01                                   |
| hsa-miR-146a-4373132     | 0.04                                              | 1.98                                | 1.93                                | 1.97                             | 1.92                                   |
| hsa-miR-509-3-5p-4395266 | 0.00                                              | 2.00                                | 2.00                                | 2.00                             | 2.00                                   |
| hsa-miR-510-4395352      | 0.00                                              | 2.00                                | 2.00                                | 2.00                             | 2.00                                   |
| hsa-miR-512-5p-4373238   | 0.00                                              | 2.00                                | 2.00                                | 2.00                             | 2.00                                   |
| hsa-miR-513-5p-4395201   | 0.00                                              | 2.00                                | 2.00                                | 2.00                             | 2.00                                   |
| hsa-miR-515-3p-4395480   | 0.00                                              | 2.00                                | 2.00                                | 2.00                             | 2.00                                   |
| hsa-miR-515-5p-4373242   | 11.71                                             | 2.00                                | 0.00                                | 2.00                             | 0.00                                   |
| hsa-miR-516a-5p-4395527  | 0.00                                              | 2.00                                | 2.00                                | 2.00                             | 2.00                                   |
| hsa-miR-516b-4395172     | 0.00                                              | 2.00                                | 109.15                              | 0.04                             | 2.00                                   |
| hsa-miR-517b-4373244     | 0.00                                              | 2.00                                | 2.00                                | 2.00                             | 2.00                                   |
| hsa-miR-518a-3p-4395508  | 4.02                                              | 2.00                                | 0.04                                | 2.00                             | 0.04                                   |
| hsa-miR-518a-5p-4395507  | 0.00                                              | 2.00                                | 2.00                                | 2.00                             | 2.00                                   |
| hsa-miR-518b-4373246     | 9.39                                              | 2.00                                | 0.03                                | 0.01                             | 0.00                                   |

Supplemental Table 1.

| MicroRNA ABI Assay ID   | relative quantification (RQ) = $2^{-\Delta\Delta CT}$ |                                                     |                                                     |                                                  |                                                        |
|-------------------------|-------------------------------------------------------|-----------------------------------------------------|-----------------------------------------------------|--------------------------------------------------|--------------------------------------------------------|
|                         | $\Delta\Delta CT[\text{CntrlHP-CntrlCB}]$             | $2^{\Delta} - \Delta\Delta CT[\text{ADHP-CntrlHP}]$ | $2^{\Delta} - \Delta\Delta CT[\text{ADCB-CntrlCB}]$ | $2^{\Delta} - \Delta\Delta CT[\text{ADHP-ADCB}]$ | $2^{\Delta} - \Delta\Delta CT[\text{CntrlHP-CntrlCB}]$ |
| hsa-miR-518c-4395512    | 0.00                                                  | 2.00                                                | 2.00                                                | 2.00                                             | 2.00                                                   |
| hsa-miR-518f-4395499    | 0.00                                                  | 2.00                                                | 34.78                                               | 0.11                                             | 2.00                                                   |
| hsa-miR-519c-3p-4373251 | 0.00                                                  | 2.00                                                | 41.22                                               | 0.10                                             | 2.00                                                   |
| hsa-miR-519e-4395481    | 0.00                                                  | 2.00                                                | 2.00                                                | 2.00                                             | 2.00                                                   |
| hsa-miR-520a-3p-4373268 | 0.00                                                  | 2.00                                                | 803.07                                              | 0.00                                             | 2.00                                                   |
| hsa-miR-520a-5p-4378085 | 0.00                                                  | 2.00                                                | 2.00                                                | 2.00                                             | 2.00                                                   |
| hsa-miR-520b-4373252    | 3.07                                                  | 2.00                                                | 0.09                                                | 2.00                                             | 0.09                                                   |
| hsa-miR-520d-5p-4395504 | 0.00                                                  | 2.00                                                | 2.00                                                | 2.00                                             | 2.00                                                   |
| hsa-miR-520e-4373255    | 0.00                                                  | 2.00                                                | 2.00                                                | 2.00                                             | 2.00                                                   |
| hsa-miR-520f-4373256    | 0.00                                                  | 2.00                                                | 2.00                                                | 2.00                                             | 2.00                                                   |
| hsa-miR-520g-4373257    | 0.00                                                  | 2.00                                                | 2.00                                                | 2.00                                             | 2.00                                                   |
| hsa-miR-521-4373259     | 31.06                                                 | 2.00                                                | 0.00                                                | 0.04                                             | 0.00                                                   |
| hsa-miR-523-4395497     | 0.00                                                  | 2.00                                                | 109.77                                              | 0.04                                             | 2.00                                                   |
| hsa-miR-524-5p-4395174  | 0.00                                                  | 2.00                                                | 2.00                                                | 2.00                                             | 2.00                                                   |
| hsa-miR-525-3p-4395496  | 0.00                                                  | 2.00                                                | 1670004071803.52                                    | 0.00                                             | 2.00                                                   |
| hsa-miR-525-5p-4378088  | 0.00                                                  | 2.00                                                | 2.00                                                | 2.00                                             | 2.00                                                   |
| hsa-miR-526b-4395493    | 0.00                                                  | 2.00                                                | 2.00                                                | 2.00                                             | 2.00                                                   |
| hsa-miR-542-5p-4395351  | 0.00                                                  | 2.00                                                | 2.00                                                | 2.00                                             | 2.00                                                   |
| hsa-miR-544-4395376     | 0.00                                                  | 2.00                                                | 2.00                                                | 2.00                                             | 2.00                                                   |
| hsa-miR-545-4395378     | 4.04                                                  | 2.00                                                | 4.95                                                | 0.01                                             | 0.04                                                   |
| hsa-miR-548a-5p-4395523 | 0.00                                                  | 2.00                                                | 458030887.87                                        | 0.00                                             | 2.00                                                   |
| hsa-miR-548b-3p-4380951 | 0.00                                                  | 2.00                                                | 2.00                                                | 2.00                                             | 2.00                                                   |
| hsa-miR-548c-3p-4380993 | 27.97                                                 | 2.00                                                | 0.00                                                | 2.00                                             | 0.00                                                   |
| hsa-miR-551b-4380945    | 4.04                                                  | 2.00                                                | 14.71                                               | 0.00                                             | 0.04                                                   |
| hsa-miR-556-3p-4395456  | 0.00                                                  | 2.00                                                | 309.19                                              | 0.01                                             | 2.00                                                   |
| hsa-miR-570-4395458     | 0.00                                                  | 2.00                                                | 114.45                                              | 0.03                                             | 2.00                                                   |
| hsa-miR-576-3p-4395462  | 3.01                                                  | 2.00                                                | 15.28                                               | 0.01                                             | 0.10                                                   |
| hsa-miR-579-4395509     | 5.02                                                  | 2.00                                                | 2.02                                                | 0.01                                             | 0.01                                                   |
| hsa-miR-582-5p-4395175  | 0.00                                                  | 2.00                                                | 2.00                                                | 2.00                                             | 2.00                                                   |
| hsa-miR-615-3p-4386777  | 0.00                                                  | 2.00                                                | 2.00                                                | 2.00                                             | 2.00                                                   |
| hsa-miR-615-5p-4395464  | 0.00                                                  | 2.00                                                | 2.00                                                | 2.00                                             | 2.00                                                   |
| hsa-miR-624-4395541     | 0.00                                                  | 2.00                                                | 2.00                                                | 2.00                                             | 2.00                                                   |
| hsa-miR-627-4380967     | 0.00                                                  | 2.00                                                | 2.00                                                | 2.00                                             | 2.00                                                   |
| hsa-miR-629-4395547     | 0.00                                                  | 2.00                                                | 825.80                                              | 0.00                                             | 2.00                                                   |

Supplemental Table 1.

| MicroRNA ABI Assay ID   | relative quantification (RQ) = 2 <sup>-ΔΔCT</sup> |                                     |                                     |                                  |                                        |
|-------------------------|---------------------------------------------------|-------------------------------------|-------------------------------------|----------------------------------|----------------------------------------|
|                         | ΔΔCT[CntrlHP-CntrlCB]                             | 2 <sup>Δ</sup> - ΔΔCT[ADHP-CntrlHP] | 2 <sup>Δ</sup> - ΔΔCT[ADCB-CntrlCB] | 2 <sup>Δ</sup> - ΔΔCT[ADHP-ADCB] | 2 <sup>Δ</sup> - ΔΔCT[CntrlHP-CntrlCB] |
| hsa-miR-651-4381007     | 5.03                                              | 2.00                                | 0.01                                | 2.00                             | 0.01                                   |
| hsa-miR-653-4395403     | 0.00                                              | 2.00                                | 2.00                                | 2.00                             | 2.00                                   |
| hsa-miR-654-3p-4395350  | 6.02                                              | 2.00                                | 5.51                                | 0.00                             | 0.00                                   |
| hsa-miR-672-4395438     | 0.00                                              | 2.00                                | 2.00                                | 2.00                             | 2.00                                   |
| hsa-miR-674-4395193     | 0.00                                              | 2.00                                | 2.00                                | 2.00                             | 2.00                                   |
| hsa-miR-871-4395465     | 0.00                                              | 2.00                                | 2.00                                | 2.00                             | 2.00                                   |
| hsa-miR-872-4395375     | 0.00                                              | 2.00                                | 2.00                                | 2.00                             | 2.00                                   |
| hsa-miR-873-4395467     | 0.00                                              | 2.00                                | 2.00                                | 2.00                             | 2.00                                   |
| hsa-miR-875-3p-4395315  | 0.00                                              | 2.00                                | 2.00                                | 2.00                             | 2.00                                   |
| hsa-miR-876-5p-4395316  | 0.00                                              | 2.00                                | 2.00                                | 2.00                             | 2.00                                   |
| hsa-miR-885-3p-4395483  | 10.79                                             | 2.00                                | 17.94                               | 0.00                             | 0.00                                   |
| hsa-miR-890-4395320     | 0.00                                              | 2.00                                | 6489.54                             | 0.00                             | 2.00                                   |
| hsa-miR-891b-4395321    | 0.00                                              | 2.00                                | 2.00                                | 2.00                             | 2.00                                   |
| hsa-miR-892a-4395306    | 0.00                                              | 2.00                                | 2.00                                | 2.00                             | 2.00                                   |
| hsa-miR-96-4373372      | 0.00                                              | 2.00                                | 2.00                                | 2.00                             | 2.00                                   |
| hsa-miR-21-4373090      | 1.01                                              | 2.00                                | 2.00                                | 0.73                             | 0.73                                   |
| hsa-miR-27a-4373287     | 0.02                                              | 2.01                                | 1.93                                | 2.04                             | 1.97                                   |
| hsa-miR-422a-4395408    | -0.04                                             | 2.01                                | 0.76                                | 5.50                             | 2.08                                   |
| hsa-miR-20b-4373263     | -0.98                                             | 2.02                                | 5.36                                | 2.01                             | 5.33                                   |
| hsa-miR-452-4395440     | 1.01                                              | 2.01                                | 34.31                               | 0.04                             | 0.73                                   |
| hsa-miR-15b-4373122     | -0.01                                             | 2.03                                | 2.01                                | 2.03                             | 2.01                                   |
| hsa-miR-296-5p-4373066  | 0.01                                              | 2.03                                | 2.11                                | 1.90                             | 1.97                                   |
| hsa-miR-338-3p-4395363  | -0.01                                             | 2.03                                | 5.66                                | 0.73                             | 2.03                                   |
| hsa-let-7e-4395517      | 1.04                                              | 2.10                                | 1.91                                | 0.78                             | 0.71                                   |
| hsa-miR-23b-4373073     | 0.02                                              | 2.09                                | 1.93                                | 2.13                             | 1.96                                   |
| hsa-miR-363-4378090     | 1.24                                              | 2.12                                | 0.22                                | 5.65                             | 0.58                                   |
| hsa-let-7b-4395446      | 2.06                                              | 5.59                                | 1.87                                | 0.76                             | 0.25                                   |
| hsa-miR-139-3p-4395424  | -4.00                                             | 5.24                                | 5.21                                | 109.80                           | 109.22                                 |
| hsa-miR-299-5p-4373188  | -0.26                                             | 3.97                                | 1.90                                | 5.44                             | 2.60                                   |
| hsa-miR-146b-5p-4373178 | -0.01                                             | 5.31                                | 2.06                                | 5.19                             | 2.02                                   |
| hsa-miR-219-5p-4373080  | 0.02                                              | 5.21                                | 2.02                                | 5.08                             | 1.97                                   |
| hsa-miR-301a-4373064    | 1.99                                              | 5.15                                | 2.04                                | 0.69                             | 0.27                                   |
| hsa-miR-28-5p-4373067   | 0.98                                              | 5.25                                | 5.55                                | 0.71                             | 0.75                                   |
| hsa-miR-329-4373191     | 0.00                                              | 5.55                                | 2.01                                | 5.54                             | 2.00                                   |
| hsa-miR-330-5p-4395341  | -1.07                                             | 5.69                                | 5.96                                | 5.56                             | 5.81                                   |

Supplemental Table 1.

| MicroRNA ABI Assay ID   | relative quantification (RQ) = 2 <sup>-ΔΔCT</sup> |                                     |                                     |                                  |                                        |
|-------------------------|---------------------------------------------------|-------------------------------------|-------------------------------------|----------------------------------|----------------------------------------|
|                         | ΔΔCT[CntrlHP-CntrlCB]                             | 2 <sup>Δ</sup> - ΔΔCT[ADHP-CntrlHP] | 2 <sup>Δ</sup> - ΔΔCT[ADCB-CntrlCB] | 2 <sup>Δ</sup> - ΔΔCT[ADHP-ADCB] | 2 <sup>Δ</sup> - ΔΔCT[CntrlHP-CntrlCB] |
| hsa-miR-326-4373050     | -2.92                                             | 5.73                                | 5.18                                | 40.85                            | 36.97                                  |
| hsa-miR-100-4373160     | 0.96                                              | 14.83                               | 2.04                                | 5.54                             | 0.76                                   |
| hsa-miR-362-5p-4378092  | 1.99                                              | 5.50                                | 1.97                                | 0.76                             | 0.27                                   |
| hsa-let-7c-4373167      | -0.02                                             | 15.24                               | 5.63                                | 5.50                             | 2.03                                   |
| hsa-miR-125a-5p-4395309 | 1.00                                              | 15.07                               | 5.62                                | 1.98                             | 0.74                                   |
| hsa-miR-449b-4381011    | 2.03                                              | 5.52                                | 2.03                                | 0.72                             | 0.26                                   |
| hsa-miR-128-4395327     | 0.98                                              | 15.81                               | 5.64                                | 2.11                             | 0.75                                   |
| hsa-miR-140-5p-4373374  | 2.03                                              | 14.86                               | 1.95                                | 2.00                             | 0.26                                   |
| hsa-miR-220b-4395317    | 0.00                                              | 10.89                               | 1.95                                | 11.18                            | 2.00                                   |
| hsa-miR-193a-5p-4395392 | 1.00                                              | 14.83                               | 1.99                                | 5.48                             | 0.73                                   |
| hsa-miR-106a-4395280    | 0.02                                              | 39.89                               | 1.97                                | 39.67                            | 1.96                                   |
| hsa-miR-203-4373095     | -1.02                                             | 14.77                               | 2.01                                | 40.71                            | 5.54                                   |
| hsa-let-7g-4395393      | 1.00                                              | 40.35                               | 1.96                                | 15.17                            | 0.74                                   |
| hsa-miR-493-4395475     | 0.98                                              | 5.46                                | 2.03                                | 2.02                             | 0.75                                   |
| hsa-let-7d-4395394      | 1.00                                              | 41.00                               | 1.97                                | 15.33                            | 0.74                                   |
| hsa-miR-200c-4395411    | 1.03                                              | 15.28                               | 1.91                                | 5.74                             | 0.72                                   |
| hsa-miR-214-4395417     | -0.98                                             | 15.23                               | 2.04                                | 39.97                            | 5.35                                   |
| hsa-miR-200b-4395362    | -0.99                                             | 16.06                               | 2.18                                | 39.49                            | 5.37                                   |
| hsa-miR-208-4373091     | -8.89                                             | 17.06                               | 2.00                                | 123469.22                        | 14473.10                               |
| hsa-miR-29b-4373288     | 1.00                                              | 14.50                               | 2.02                                | 5.28                             | 0.74                                   |
| hsa-miR-133a-4395357    | -1.98                                             | 40.58                               | 2.03                                | 289.18                           | 14.50                                  |
| hsa-miR-134-4373299     | 0.01                                              | 40.60                               | 2.01                                | 39.93                            | 1.98                                   |
| hsa-miR-129-3p-4373297  | 2.02                                              | 42.04                               | 0.71                                | 15.63                            | 0.26                                   |
| hsa-miR-143-4395360     | 0.02                                              | 40.91                               | 2.00                                | 40.17                            | 1.97                                   |
| hsa-miR-185-4395382     | -1.01                                             | 39.81                               | 5.58                                | 39.23                            | 5.50                                   |
| hsa-miR-381-4373020     | -1.02                                             | 13.86                               | 40.59                               | 1.89                             | 5.52                                   |
| hsa-miR-103-4373158     | -0.02                                             | 108.62                              | 5.60                                | 39.52                            | 2.04                                   |
| hsa-let-7f-4373164      | 0.99                                              | 110.81                              | 2.04                                | 40.40                            | 0.74                                   |
| hsa-miR-19a-4373099     | 1.02                                              | 38.36                               | 1.97                                | 13.99                            | 0.72                                   |
| hsa-miR-199a-3p-4395415 | 1.01                                              | 39.99                               | 1.99                                | 14.61                            | 0.73                                   |
| hsa-miR-200a-4378069    | 2.73                                              | 32.76                               | 0.00                                | 127076.83                        | 0.13                                   |
| hsa-miR-137-4373301     | -6.97                                             | 108.56                              | 0.03                                | 6652792.04                       | 2134.20                                |
| hsa-miR-140-3p-4395345  | 1.00                                              | 111.17                              | 1.99                                | 41.04                            | 0.74                                   |
| hsa-miR-22-4373079      | -1.02                                             | 39.28                               | 281.05                              | 0.78                             | 5.57                                   |
| hsa-miR-224-4395210     | 0.99                                              | 40.94                               | 2.03                                | 14.97                            | 0.74                                   |
| hsa-miR-148a-4373130    | -1.98                                             | 112.40                              | 5.37                                | 303.61                           | 14.52                                  |

Supplemental Table 1.

| MicroRNA ABI Assay ID   | relative quantification (RQ) = $2^{-\Delta\Delta CT}$ |                                                     |                                                     |                                                  |                                                        |
|-------------------------|-------------------------------------------------------|-----------------------------------------------------|-----------------------------------------------------|--------------------------------------------------|--------------------------------------------------------|
|                         | $\Delta\Delta CT[\text{CntrlHP-CntrlCB}]$             | $2^{\Delta} - \Delta\Delta CT[\text{ADHP-CntrlHP}]$ | $2^{\Delta} - \Delta\Delta CT[\text{ADCB-CntrlCB}]$ | $2^{\Delta} - \Delta\Delta CT[\text{ADHP-ADCB}]$ | $2^{\Delta} - \Delta\Delta CT[\text{CntrlHP-CntrlCB}]$ |
| hsa-miR-124-4373295     | 2.00                                                  | 307.40                                              | 1.96                                                | 42.46                                            | 0.27                                                   |
| hsa-miR-194-4373106     | 4.00                                                  | 108.34                                              | 2.03                                                | 1.96                                             | 0.04                                                   |
| hsa-miR-192-4373108     | 5.00                                                  | 108.99                                              | 1.96                                                | 0.75                                             | 0.01                                                   |
| hsa-miR-187-4373307     | -0.04                                                 | 115.12                                              | 5.72                                                | 41.97                                            | 2.09                                                   |
| hsa-miR-129-5p-4373171  | 0.01                                                  | 313.39                                              | 0.75                                                | 830.35                                           | 1.99                                                   |
| hsa-let-7a-4373169      | 1.03                                                  | 4375.37                                             | 2.00                                                | 1567.20                                          | 0.72                                                   |
| hsa-miR-202-4395474     | -1.18                                                 | 105.21                                              | 19.79                                               | 34.53                                            | 6.49                                                   |
| hsa-miR-215-4373084     | 5.06                                                  | 111.82                                              | 0.79                                                | 1.81                                             | 0.01                                                   |
| hsa-miR-148b-4373129    | 1.01                                                  | 310.52                                              | 5.52                                                | 40.97                                            | 0.73                                                   |
| hsa-miR-133b-4395358    | -1.07                                                 | 772.43                                              | 1.97                                                | 2301.11                                          | 5.86                                                   |
| hsa-miR-449a-4373207    | 3.01                                                  | 39.65                                               | 1.96                                                | 2.00                                             | 0.10                                                   |
| hsa-miR-135a-4373140    | 2.00                                                  | 802.43                                              | 1.96                                                | 110.74                                           | 0.27                                                   |
| hsa-miR-429-4373203     | -4.01                                                 | 40.63                                               | 2.00                                                | 2250.81                                          | 110.79                                                 |
| hsa-miR-448-4373206     | -4.01                                                 | 40.56                                               | 2.00                                                | 2229.53                                          | 109.93                                                 |
| hsa-miR-130a-4373145    | 1.99                                                  | 833.84                                              | 5.53                                                | 41.18                                            | 0.27                                                   |
| hsa-miR-106b-4373155    | 2.01                                                  | 2171.23                                             | 1.98                                                | 294.90                                           | 0.27                                                   |
| hsa-miR-155-4395459     | -21.22                                                | 5490228.94                                          | 316.48                                              | 56856244999103.90                                | 3277392085.58                                          |
| hsa-miR-142-3p-4373136  | 1.04                                                  | 824.56                                              | 0.27                                                | 2190.20                                          | 0.71                                                   |
| hsa-miR-154-4373270     | 1.02                                                  | 855.72                                              | 0.74                                                | 834.26                                           | 0.72                                                   |
| hsa-miR-130b-4373144    | 1.99                                                  | 2216.64                                             | 5.37                                                | 113.23                                           | 0.27                                                   |
| hsa-miR-377-4373025     | -4.02                                                 | 106.27                                              | 2.00                                                | 5933.37                                          | 111.67                                                 |
| hsa-miR-105-4395278     | -2.01                                                 | 5922.70                                             | 5.43                                                | 16236.99                                         | 14.89                                                  |
| hsa-miR-10a-4373153     | -0.07                                                 | 5997.79                                             | 2.13                                                | 6029.06                                          | 2.14                                                   |
| hsa-miR-302b-4378071    | -0.01                                                 | 272.04                                              | 5.20                                                | 105.65                                           | 2.02                                                   |
| hsa-miR-196b-4395326    | -2.05                                                 | 803.48                                              | 5.68                                                | 2194.14                                          | 15.52                                                  |
| hsa-miR-190-4373110     | 2.03                                                  | 823.90                                              | 0.73                                                | 297.84                                           | 0.26                                                   |
| hsa-miR-146b-3p-4395472 | -3.05                                                 | 2128.23                                             | 5.64                                                | 16014.46                                         | 42.42                                                  |
| hsa-miR-18a-4395533     | 3.03                                                  | 864.24                                              | 0.73                                                | 115.11                                           | 0.10                                                   |
| hsa-miR-107-4373154     | 1.95                                                  | 15494.61                                            | 2.00                                                | 2208.23                                          | 0.29                                                   |
| hsa-miR-101-4395364     | 0.98                                                  | 15866.21                                            | 1.99                                                | 5982.22                                          | 0.75                                                   |
| hsa-miR-135b-4395372    | 8.02                                                  | 5987.01                                             | 2.00                                                | 1.97                                             | 0.00                                                   |
| hsa-miR-125a-3p-4395310 | 1.01                                                  | 16359.22                                            | 5.39                                                | 2211.55                                          | 0.73                                                   |
| hsa-miR-1-4395333       | -1.00                                                 | 16556.72                                            | 2.03                                                | 44114.65                                         | 5.41                                                   |

Supplemental Table 1.

| MicroRNA ABI Assay ID   | relative quantification (RQ) = $2^{-\Delta\Delta CT}$ |                                                     |                                                     |                                                  |                                                        |
|-------------------------|-------------------------------------------------------|-----------------------------------------------------|-----------------------------------------------------|--------------------------------------------------|--------------------------------------------------------|
|                         | $\Delta\Delta CT[\text{CntrlHP-CntrlCB}]$             | $2^{\Delta} - \Delta\Delta CT[\text{ADHP-CntrlHP}]$ | $2^{\Delta} - \Delta\Delta CT[\text{ADCB-CntrlCB}]$ | $2^{\Delta} - \Delta\Delta CT[\text{ADHP-ADCB}]$ | $2^{\Delta} - \Delta\Delta CT[\text{CntrlHP-CntrlCB}]$ |
| hsa-miR-183-4395380     | -4.05                                                 | 15637.81                                            | 85.42                                               | 20997.26                                         | 114.69                                                 |
| hsa-miR-182-4395445     | -4.05                                                 | 15692.64                                            | 2.00                                                | 897122.04                                        | 114.34                                                 |
| hsa-miR-193a-3p-4395361 | -3.13                                                 | 14652.22                                            | 2.00                                                | 335020.56                                        | 45.73                                                  |
| hsa-miR-136-4373173     | -0.95                                                 | 121777.05                                           | 12.21                                               | 51459.34                                         | 5.16                                                   |
| hsa-miR-153-4373305     | 1.05                                                  | 47020.89                                            | 0.04                                                | 915336.63                                        | 0.70                                                   |
| hsa-miR-508-5p-4395203  | 0.00                                                  | 27.55                                               | 2.00                                                | 27.55                                            | 2.00                                                   |
| hsa-miR-508-3p-4373233  | 4.00                                                  | 41.68                                               | 0.04                                                | 41.68                                            | 0.04                                                   |
| hsa-miR-507-4373232     | 0.00                                                  | 89.00                                               | 30.37                                               | 5.86                                             | 2.00                                                   |
| hsa-miR-506-4373231     | 0.00                                                  | 100.11                                              | 2.00                                                | 100.11                                           | 2.00                                                   |
| hsa-miR-503-4373228     | 0.00                                                  | 106.70                                              | 2.00                                                | 106.70                                           | 2.00                                                   |
| hsa-miR-501-3p-4395546  | 9.20                                                  | 110.05                                              | 0.00                                                | 110.05                                           | 0.00                                                   |
| hsa-miR-499-3p-4395538  | 0.00                                                  | 112.57                                              | 2.00                                                | 112.57                                           | 2.00                                                   |
| hsa-miR-492-4373217     | 0.00                                                  | 303.82                                              | 2.00                                                | 303.82                                           | 2.00                                                   |
| hsa-miR-491-3p-4395471  | 0.00                                                  | 339.12                                              | 806.78                                              | 0.84                                             | 2.00                                                   |
| hsa-miR-486-3p-4395204  | 10.02                                                 | 771.74                                              | 2.09                                                | 0.03                                             | 0.00                                                   |
| hsa-miR-453-4395429     | 0.00                                                  | 812.61                                              | 2.00                                                | 812.61                                           | 2.00                                                   |
| hsa-miR-450b-3p-4395319 | 0.00                                                  | 928.76                                              | 2.00                                                | 928.76                                           | 2.00                                                   |
| hsa-miR-450a-4395414    | 0.00                                                  | 2201.40                                             | 2.00                                                | 2201.40                                          | 2.00                                                   |
| hsa-miR-431-4395173     | 4.00                                                  | 2247.22                                             | 28.60                                               | 2.86                                             | 0.04                                                   |
| hsa-miR-424-4373201     | 0.00                                                  | 2272.30                                             | 2.00                                                | 2272.30                                          | 2.00                                                   |
| hsa-miR-412-4373199     | 3.96                                                  | 2279.58                                             | 0.04                                                | 2279.58                                          | 0.04                                                   |
| hsa-miR-384-4373017     | 0.00                                                  | 5577.79                                             | 2.00                                                | 5577.79                                          | 2.00                                                   |
| hsa-miR-380-4373022     | 9.80                                                  | 5919.74                                             | 1.05                                                | 0.63                                             | 0.00                                                   |
| hsa-miR-376b-4373196    | 0.00                                                  | 5973.85                                             | 2.00                                                | 5973.85                                          | 2.00                                                   |
| hsa-miR-373-4378073     | 0.00                                                  | 6048.39                                             | 2.00                                                | 6048.39                                          | 2.00                                                   |
| hsa-miR-372-4373029     | 4.03                                                  | 6075.06                                             | 2.03                                                | 106.72                                           | 0.04                                                   |
| hsa-miR-371-3p-4395235  | 0.00                                                  | 6094.53                                             | 2.00                                                | 6094.53                                          | 2.00                                                   |
| hsa-miR-369-5p-4373195  | 4.02                                                  | 6125.69                                             | 5.43                                                | 40.40                                            | 0.04                                                   |
| hsa-miR-369-3p-4373032  | 5.03                                                  | 6134.28                                             | 0.74                                                | 108.59                                           | 0.01                                                   |
| hsa-miR-367-4373034     | 0.00                                                  | 6155.17                                             | 2302.26                                             | 5.35                                             | 2.00                                                   |
| hsa-miR-362-3p-4395228  | 6.05                                                  | 6204.61                                             | 0.71                                                | 41.09                                            | 0.00                                                   |
| hsa-miR-33b-4395196     | 0.00                                                  | 16362.50                                            | 7459113.87                                          | 0.00                                             | 2.00                                                   |
| hsa-miR-32-4395220      | 0.00                                                  | 17083.14                                            | 2.00                                                | 17083.14                                         | 2.00                                                   |



Supplemental Table 1.

| MicroRNA ABI Assay ID    | relative quantification (RQ) = $2^{-\Delta\Delta CT}$ |                                               |                                               |                                            |                                                  |
|--------------------------|-------------------------------------------------------|-----------------------------------------------|-----------------------------------------------|--------------------------------------------|--------------------------------------------------|
|                          | $\Delta\Delta CT$ [CntrlHP-CntrlCB]                   | $2^{\Delta} - \Delta\Delta CT$ [ADHP-CntrlHP] | $2^{\Delta} - \Delta\Delta CT$ [ADCB-CntrlCB] | $2^{\Delta} - \Delta\Delta CT$ [ADHP-ADCB] | $2^{\Delta} - \Delta\Delta CT$ [CntrlHP-CntrlCB] |
| hsa-miR-302c-4378072     | 0.00                                                  | 42055.57                                      | 113.78                                        | 739.26                                     | 2.00                                             |
| hsa-miR-302a-4378070     | 6.04                                                  | 43280.05                                      | 2.00                                          | 102.90                                     | 0.00                                             |
| hsa-miR-301b-4395503     | 6.03                                                  | 43349.36                                      | 1.97                                          | 105.93                                     | 0.00                                             |
| hsa-miR-299-3p-4373189   | 10.40                                                 | 44535.74                                      | 0.00                                          | 806.70                                     | 0.00                                             |
| hsa-miR-298-4395301      | 0.00                                                  | 44602.59                                      | 2.00                                          | 44602.59                                   | 2.00                                             |
| hsa-miR-296-3p-4395212   | 0.00                                                  | 44741.07                                      | 2.00                                          | 44741.07                                   | 2.00                                             |
| hsa-miR-220c-4395322     | 0.00                                                  | 59447.40                                      | 2.00                                          | 59447.40                                   | 2.00                                             |
| hsa-miR-220-4373078      | 0.00                                                  | 114731.19                                     | 2.00                                          | 114731.19                                  | 2.00                                             |
| hsa-miR-219-1-3p-4395206 | 0.00                                                  | 118782.24                                     | 2.00                                          | 118782.24                                  | 2.00                                             |
| hsa-miR-217-4395448      | 0.00                                                  | 120794.64                                     | 2.00                                          | 120794.64                                  | 2.00                                             |
| hsa-miR-216b-4395437     | 0.00                                                  | 120927.59                                     | 9524206.62                                    | 0.03                                       | 2.00                                             |
| hsa-miR-216a-4395331     | 0.00                                                  | 121521.59                                     | 2.00                                          | 121521.59                                  | 2.00                                             |
| hsa-miR-205-4373093      | 0.00                                                  | 123679.30                                     | 29129069.36                                   | 0.01                                       | 2.00                                             |
| hsa-miR-199b-5p-4373100  | 0.00                                                  | 319383.28                                     | 2.00                                          | 319383.28                                  | 2.00                                             |
| hsa-miR-199a-5p-4373272  | 0.00                                                  | 328288.21                                     | 2.00                                          | 328288.21                                  | 2.00                                             |
| hsa-miR-198-4395384      | 0.00                                                  | 330958.14                                     | 2.00                                          | 330958.14                                  | 2.00                                             |
| hsa-miR-18b-4395328      | 0.00                                                  | 338455.26                                     | 2.00                                          | 338455.26                                  | 2.00                                             |
| hsa-miR-188-3p-4395217   | 4.08                                                  | 341242.00                                     | 0.03                                          | 341242.00                                  | 0.03                                             |
| hsa-miR-147b-4395373     | 0.00                                                  | 937289.22                                     | 89670032.07                                   | 0.02                                       | 2.00                                             |
| hsa-miR-147-4373131      | 4.02                                                  | 1861786.71                                    | 0.04                                          | 1861786.71                                 | 0.04                                             |
| hsa-miR-142-5p-4395359   | 0.00                                                  | 2482923.32                                    | 771.35                                        | 6437.83                                    | 2.00                                             |
| hsa-miR-141-4373137      | 4.01                                                  | 2487396.60                                    | 1.97                                          | 45740.86                                   | 0.04                                             |
| hsa-miR-127-5p-4395340   | 0.00                                                  | 17650014.81                                   | 1522017.29                                    | 23.19                                      | 2.00                                             |
| hsa-miR-122-4395356      | 6.14                                                  | 18666614.78                                   | 1.77                                          | 45717.99                                   | 0.00                                             |
| hsa-miR-10b-4395329      | 4.00                                                  | 18690897.16                                   | 2.07                                          | 331123.66                                  | 0.04                                             |

Supplemental Table 1.

| MicroRNA ABI Assay ID         |
|-------------------------------|
| MammU6-4395470                |
| RNU44-4373384                 |
| RNU48-4373383                 |
| <b>MeanEndogenousControls</b> |
| ath-miR159a-4373390           |
| hsa-miR-98-4373009            |
| hsa-miR-501-5p-4373226        |
| hsa-miR-342-3p-4395371        |
| hsa-miR-331-3p-4373046        |
| hsa-miR-328-4373049           |
| hsa-miR-370-4395386           |
| hsa-miR-204-4373094           |
| hsa-miR-211-4373088           |
| hsa-miR-330-3p-4373047        |
| hsa-miR-191-4395410           |
| hsa-miR-346-4373038           |
| hsa-miR-149-4395366           |
| hsa-miR-139-5p-4395400        |
| hsa-miR-208b-4395401          |
| hsa-miR-138-4395395           |
| hsa-miR-132-4373143           |
| hsa-miR-184-4373113           |
| hsa-miR-126-4395339           |
| hsa-miR-181c-4373115          |
| hsa-miR-152-4395170           |
| hsa-miR-15a-4373123           |
| hsa-miR-9-4373285             |
| hsa-miR-99a-4373008           |
| hsa-miR-99b-4373007           |
| hsa-miR-885-5p-4395407        |
| hsa-miR-539-4378103           |
| hsa-miR-886-3p-4395305        |
| hsa-miR-574-3p-4395460        |
| hsa-miR-744-4395435           |
| hsa-miR-95-4373011            |
| hsa-miR-92a-4395169           |
| hsa-miR-708-4395452           |
| hsa-miR-874-4395379           |
| hsa-miR-886-5p-4395304        |

**Supplemental Table 1.** Cerebellum and hippocampus miRnome for AD and controls. Applied Biosystems (ABI) microRNA array panel A results provide miRnome for n=377 human miRNA expressed in cerebellum and hippocampus of controls and Alzheimer's disease (AD).

| Color Code  | Category                      |
|-------------|-------------------------------|
| Light green | Quartile 1 high expression    |
| Dark green  | Quartile 2 moderate high      |
| Dark red    | Quartile 3 moderate low       |
| Light red   | Quartile 4 low expression     |
| Grey        | Negative CT $\geq 32$         |
| no color    | Not quartiled                 |
| yellow      | Chosen for validation qRT-PCR |
| Orange      | Endogenous Controls           |

MiRNA array results with 3 or more arrays with negative CT ( $\geq 32$ ) values were considered low efficiency assays and were excluded from phase II analyses.

Quartiles do not include excluded values.

Quartiles do not include loading controls.

Quartiles are calculated according to each separate array.

Quartiles are shown arranged according to Relative Quantification for ratio.

Relative Quantification ratio is one array (41-CT) as the numerator and another array (41-CT) as the denominator. For example , RQ = (41-CT for AD HP) / (41-CT for Cntrl HP).

Array 1 = Control Cerebellum = CntrlCB

Array 2 = Control Hippocampus = CntrlHP

Array 3 = AD Cerebellum = ADCB

Array 4 = AD Hippocampus = ADHP

At least 3 miRNA were chosen from each RQ = AD HP / Control HP quartile for validation using qRT-PCR.

Supplemental Table 1.

| MicroRNA ABI Assay ID   |
|-------------------------|
| hsa-miR-93-4373302      |
| hsa-miR-532-3p-4395466  |
| hsa-miR-548d-3p-4381008 |
| hsa-miR-576-5p-4395461  |
| hsa-miR-887-4395485     |
| hsa-miR-628-5p-4395544  |
| hsa-miR-598-4395179     |
| hsa-miR-532-5p-4380928  |
| hsa-miR-655-4381015     |
| hsa-miR-660-4380925     |
| hsa-miR-671-3p-4395433  |
| hsa-miR-652-4395463     |
| hsa-miR-616-4395525     |
| hsa-miR-590-5p-4395176  |
| hsa-miR-625-4395542     |
| hsa-miR-642-4380995     |
| hsa-miR-541-4395312     |
| hsa-miR-758-4395180     |
| hsa-miR-519d-4395514    |
| hsa-miR-891a-4395302    |
| hsa-miR-889-4395313     |
| hsa-miR-636-4395199     |
| hsa-miR-518d-3p-4373248 |
| hsa-miR-512-3p-4381034  |
| hsa-miR-582-3p-4395510  |
| hsa-miR-519a-4395526    |
| hsa-miR-548d-5p-4395348 |
| hsa-miR-548b-5p-4395519 |
| hsa-miR-511-4373236     |
| hsa-miR-597-4380960     |
| hsa-miR-522-4395524     |
| hsa-miR-654-5p-4381014  |
| hsa-miR-518d-5p-4395500 |
| hsa-miR-518e-4395506    |
| hsa-miR-517c-4373264    |
| hsa-miR-542-3p-4378101  |
| hsa-miR-876-3p-4395336  |
| hsa-miR-548c-5p-4395540 |
| hsa-miR-561-4380938     |

Supplemental Table 1.

| MicroRNA ABI Assay ID   |
|-------------------------|
| hsa-miR-556-5p-4395455  |
| hsa-miR-509-5p-4395346  |
| hsa-miR-589-4395520     |
| hsa-miR-548a-3p-4380948 |
| hsa-miR-618-4380996     |
| hsa-miR-888-4395323     |
| hsa-miR-517a-4395513    |
| hsa-miR-325-4373051     |
| hsa-miR-337-5p-4395267  |
| hsa-miR-495-4381078     |
| hsa-miR-491-5p-4381053  |
| hsa-miR-484-4381032     |
| hsa-miR-504-4395195     |
| hsa-miR-499-5p-4381047  |
| hsa-miR-485-3p-4378095  |
| hsa-miR-505-4395200     |
| hsa-miR-450b-5p-4395318 |
| hsa-miR-502-5p-4373227  |
| hsa-miR-487b-4378102    |
| hsa-miR-433-4373205     |
| hsa-miR-222-4395387     |
| hsa-miR-485-5p-4373212  |
| hsa-miR-454-4395434     |
| hsa-miR-494-4395476     |
| hsa-miR-486-5p-4378096  |
| hsa-miR-30c-4373060     |
| hsa-miR-382-4373019     |
| hsa-miR-374b-4381045    |
| hsa-miR-24-4373072      |
| hsa-miR-425-4380926     |
| hsa-miR-488-4395468     |
| hsa-miR-500-4395539     |
| hsa-miR-320-4395388     |
| hsa-miR-483-5p-4395449  |
| hsa-miR-383-4373018     |
| hsa-miR-451-4373360     |

Supplemental Table 1.

| MicroRNA ABI Assay ID  |
|------------------------|
| hsa-miR-30b-4373290    |
| hsa-miR-29a-4395223    |
| hsa-miR-26a-4395166    |
| hsa-miR-34a-4395168    |
| hsa-miR-411-4381013    |
| hsa-miR-410-4378093    |
| hsa-miR-490-3p-4373215 |
| hsa-miR-223-4395406    |
| hsa-miR-374a-4373028   |
| hsa-miR-376c-4395233   |
| hsa-miR-365-4373194    |
| hsa-miR-455-3p-4395355 |
| hsa-miR-323-3p-4395338 |
| hsa-miR-23a-4373074    |
| hsa-miR-376a-4373026   |
| hsa-miR-375-4373027    |
| hsa-miR-218-4373081    |
| hsa-miR-379-4373349    |
| hsa-miR-31-4395390     |
| hsa-miR-496-4386771    |
| hsa-miR-197-4373102    |
| hsa-miR-345-4395297    |
| hsa-miR-324-5p-4373052 |
| hsa-miR-339-3p-4395295 |
| hsa-miR-339-5p-4395368 |
| hsa-miR-489-4395469    |
| hsa-miR-26b-4395167    |
| hsa-miR-221-4373077    |
| hsa-miR-487a-4378097   |
| hsa-miR-423-5p-4395451 |
| hsa-miR-193b-4395478   |
| hsa-miR-34c-5p-4373036 |
| hsa-miR-181a-4373117   |

Supplemental Table 1.

| MicroRNA ABI Assay ID    |
|--------------------------|
| hsa-miR-19b-4373098      |
| hsa-miR-502-3p-4395194   |
| hsa-miR-340-4395369      |
| hsa-miR-145-4395389      |
| hsa-miR-324-3p-4395272   |
| hsa-miR-342-5p-4395258   |
| hsa-miR-28-3p-4395557    |
| hsa-miR-20a-4373286      |
| hsa-miR-210-4373089      |
| hsa-miR-150-4373127      |
| hsa-miR-16-4373121       |
| hsa-miR-361-5p-4373035   |
| hsa-miR-409-5p-4395442   |
| hsa-miR-335-4373045      |
| hsa-miR-331-5p-4395344   |
| hsa-miR-27b-4373068      |
| hsa-miR-219-2-3p-4395501 |
| hsa-miR-186-4395396      |
| hsa-miR-212-4373087      |
| hsa-miR-195-4373105      |
| hsa-miR-17-4395419       |
| hsa-miR-125b-4373148     |
| hsa-miR-29c-4395171      |
| hsa-miR-127-3p-4373147   |
| hsa-miR-25-4373071       |
| hsa-miR-455-5p-4378098   |
| hsa-miR-146a-4373132     |
| hsa-miR-509-3-5p-4395266 |
| hsa-miR-510-4395352      |
| hsa-miR-512-5p-4373238   |
| hsa-miR-513-5p-4395201   |
| hsa-miR-515-3p-4395480   |
| hsa-miR-515-5p-4373242   |
| hsa-miR-516a-5p-4395527  |
| hsa-miR-516b-4395172     |
| hsa-miR-517b-4373244     |
| hsa-miR-518a-3p-4395508  |
| hsa-miR-518a-5p-4395507  |
| hsa-miR-518b-4373246     |

Supplemental Table 1.

| MicroRNA ABI Assay ID   |
|-------------------------|
| hsa-miR-518c-4395512    |
| hsa-miR-518f-4395499    |
| hsa-miR-519c-3p-4373251 |
| hsa-miR-519e-4395481    |
| hsa-miR-520a-3p-4373268 |
| hsa-miR-520a-5p-4378085 |
| hsa-miR-520b-4373252    |
| hsa-miR-520d-5p-4395504 |
| hsa-miR-520e-4373255    |
| hsa-miR-520f-4373256    |
| hsa-miR-520g-4373257    |
| hsa-miR-521-4373259     |
| hsa-miR-523-4395497     |
| hsa-miR-524-5p-4395174  |
| hsa-miR-525-3p-4395496  |
| hsa-miR-525-5p-4378088  |
| hsa-miR-526b-4395493    |
| hsa-miR-542-5p-4395351  |
| hsa-miR-544-4395376     |
| hsa-miR-545-4395378     |
| hsa-miR-548a-5p-4395523 |
| hsa-miR-548b-3p-4380951 |
| hsa-miR-548c-3p-4380993 |
| hsa-miR-551b-4380945    |
| hsa-miR-556-3p-4395456  |
| hsa-miR-570-4395458     |
| hsa-miR-576-3p-4395462  |
| hsa-miR-579-4395509     |
| hsa-miR-582-5p-4395175  |
| hsa-miR-615-3p-4386777  |
| hsa-miR-615-5p-4395464  |
| hsa-miR-624-4395541     |
| hsa-miR-627-4380967     |
| hsa-miR-629-4395547     |

Supplemental Table 1.

| MicroRNA ABI Assay ID   |
|-------------------------|
| hsa-miR-651-4381007     |
| hsa-miR-653-4395403     |
| hsa-miR-654-3p-4395350  |
| hsa-miR-672-4395438     |
| hsa-miR-674-4395193     |
| hsa-miR-871-4395465     |
| hsa-miR-872-4395375     |
| hsa-miR-873-4395467     |
| hsa-miR-875-3p-4395315  |
| hsa-miR-876-5p-4395316  |
| hsa-miR-885-3p-4395483  |
| hsa-miR-890-4395320     |
| hsa-miR-891b-4395321    |
| hsa-miR-892a-4395306    |
| hsa-miR-96-4373372      |
| hsa-miR-21-4373090      |
| hsa-miR-27a-4373287     |
| hsa-miR-422a-4395408    |
| hsa-miR-20b-4373263     |
| hsa-miR-452-4395440     |
| hsa-miR-15b-4373122     |
| hsa-miR-296-5p-4373066  |
| hsa-miR-338-3p-4395363  |
| hsa-let-7e-4395517      |
| hsa-miR-23b-4373073     |
| hsa-miR-363-4378090     |
| hsa-let-7b-4395446      |
| hsa-miR-139-3p-4395424  |
| hsa-miR-299-5p-4373188  |
| hsa-miR-146b-5p-4373178 |
| hsa-miR-219-5p-4373080  |
| hsa-miR-301a-4373064    |
| hsa-miR-28-5p-4373067   |
| hsa-miR-329-4373191     |
| hsa-miR-330-5p-4395341  |



Supplemental Table 1.

| MicroRNA ABI Assay ID   |
|-------------------------|
| hsa-miR-326-4373050     |
| hsa-miR-100-4373160     |
| hsa-miR-362-5p-4378092  |
| hsa-let-7c-4373167      |
| hsa-miR-125a-5p-4395309 |
| hsa-miR-449b-4381011    |
| hsa-miR-128-4395327     |
| hsa-miR-140-5p-4373374  |
| hsa-miR-220b-4395317    |
| hsa-miR-193a-5p-4395392 |
| hsa-miR-106a-4395280    |
| hsa-miR-203-4373095     |
| hsa-let-7g-4395393      |
| hsa-miR-493-4395475     |
| hsa-let-7d-4395394      |
| hsa-miR-200c-4395411    |
| hsa-miR-214-4395417     |
| hsa-miR-200b-4395362    |
| hsa-miR-208-4373091     |
| hsa-miR-29b-4373288     |
| hsa-miR-133a-4395357    |
| hsa-miR-134-4373299     |
| hsa-miR-129-3p-4373297  |
| hsa-miR-143-4395360     |
| hsa-miR-185-4395382     |
| hsa-miR-381-4373020     |
| hsa-miR-103-4373158     |
| hsa-let-7f-4373164      |
| hsa-miR-19a-4373099     |
| hsa-miR-199a-3p-4395415 |
| hsa-miR-200a-4378069    |
| hsa-miR-137-4373301     |
| hsa-miR-140-3p-4395345  |
| hsa-miR-22-4373079      |
| hsa-miR-224-4395210     |
| hsa-miR-148a-4373130    |

Supplemental Table 1.

| MicroRNA ABI Assay ID   |
|-------------------------|
| hsa-miR-124-4373295     |
| hsa-miR-194-4373106     |
| hsa-miR-192-4373108     |
| hsa-miR-187-4373307     |
| hsa-miR-129-5p-4373171  |
| hsa-let-7a-4373169      |
| hsa-miR-202-4395474     |
| hsa-miR-215-4373084     |
| hsa-miR-148b-4373129    |
| hsa-miR-133b-4395358    |
| hsa-miR-449a-4373207    |
| hsa-miR-135a-4373140    |
| hsa-miR-429-4373203     |
| hsa-miR-448-4373206     |
| hsa-miR-130a-4373145    |
| hsa-miR-106b-4373155    |
| hsa-miR-155-4395459     |
| hsa-miR-142-3p-4373136  |
| hsa-miR-154-4373270     |
| hsa-miR-130b-4373144    |
| hsa-miR-377-4373025     |
| hsa-miR-105-4395278     |
| hsa-miR-10a-4373153     |
| hsa-miR-302b-4378071    |
| hsa-miR-196b-4395326    |
| hsa-miR-190-4373110     |
| hsa-miR-146b-3p-4395472 |
| hsa-miR-18a-4395533     |
| hsa-miR-107-4373154     |
| hsa-miR-101-4395364     |
| hsa-miR-135b-4395372    |
| hsa-miR-125a-3p-4395310 |
| hsa-miR-1-4395333       |

Supplemental Table 1.

| MicroRNA ABI Assay ID   |
|-------------------------|
| hsa-miR-183-4395380     |
| hsa-miR-182-4395445     |
| hsa-miR-193a-3p-4395361 |
| hsa-miR-136-4373173     |
| hsa-miR-153-4373305     |
| hsa-miR-508-5p-4395203  |
| hsa-miR-508-3p-4373233  |
| hsa-miR-507-4373232     |
| hsa-miR-506-4373231     |
| hsa-miR-503-4373228     |
| hsa-miR-501-3p-4395546  |
| hsa-miR-499-3p-4395538  |
| hsa-miR-492-4373217     |
| hsa-miR-491-3p-4395471  |
| hsa-miR-486-3p-4395204  |
| hsa-miR-453-4395429     |
| hsa-miR-450b-3p-4395319 |
| hsa-miR-450a-4395414    |
| hsa-miR-431-4395173     |
| hsa-miR-424-4373201     |
| hsa-miR-412-4373199     |
| hsa-miR-384-4373017     |
| hsa-miR-380-4373022     |
| hsa-miR-376b-4373196    |
| hsa-miR-373-4378073     |
| hsa-miR-372-4373029     |
| hsa-miR-371-3p-4395235  |
| hsa-miR-369-5p-4373195  |
| hsa-miR-369-3p-4373032  |
| hsa-miR-367-4373034     |
| hsa-miR-362-3p-4395228  |
| hsa-miR-33b-4395196     |
| hsa-miR-32-4395220      |

Supplemental Table 1.

| MicroRNA ABI Assay ID    |
|--------------------------|
| hsa-miR-302c-4378072     |
| hsa-miR-302a-4378070     |
| hsa-miR-301b-4395503     |
| hsa-miR-299-3p-4373189   |
| hsa-miR-298-4395301      |
| hsa-miR-296-3p-4395212   |
| hsa-miR-220c-4395322     |
| hsa-miR-220-4373078      |
| hsa-miR-219-1-3p-4395206 |
| hsa-miR-217-4395448      |
| hsa-miR-216b-4395437     |
| hsa-miR-216a-4395331     |
| hsa-miR-205-4373093      |
| hsa-miR-199b-5p-4373100  |
| hsa-miR-199a-5p-4373272  |
| hsa-miR-198-4395384      |
| hsa-miR-18b-4395328      |
| hsa-miR-188-3p-4395217   |
| hsa-miR-147b-4395373     |
| hsa-miR-147-4373131      |
| hsa-miR-142-5p-4395359   |
| hsa-miR-141-4373137      |
| hsa-miR-127-5p-4395340   |
| hsa-miR-122-4395356      |
| hsa-miR-10b-4395329      |

Supplemental Table 2

| Sample Variables |         |        |     |     |           |     |             |            |        | Endogenous Housekeeping Controls |              |                  |                    |
|------------------|---------|--------|-----|-----|-----------|-----|-------------|------------|--------|----------------------------------|--------------|------------------|--------------------|
| SampleID         | Disease | Region | AGE | SEX | Onset Age | PMI | PlaqueScore | BraakStage | APOEε4 | RNU44_MeanCT                     | RNU48_MeanCT | meanPositiveEndo | ath-miR159a_MeanCT |
| 406              | AD      | CB     | 87  | F   | 83        | 5   | MOD         | VI         | e4-    | 21.03                            | 16.76        | 18.89            | 38.65              |
| 2257             | AD      | CB     | 60  | F   | 55        | 7.3 | MOD         | IV         | e4-    | 21.21                            | 16.90        | 19.05            | 38.96              |
| 3010             | AD      | CB     | 82  | M   | 76        | 8   | FREQ        | IV         | e4+    | 22.35                            | 18.20        | 20.27            | 39.20              |
| 3027             | AD      | CB     | 78  | M   | 62        | 4.2 | MOD         | V          | e4+    | 21.38                            | 16.80        | 19.09            | 39.79              |
| 3076             | AD      | CB     | 81  | M   | 68        | 5   | FREQ        | V          | e4+    | 19.16                            | 15.43        | 17.29            | 34.50              |
| 3171             | AD      | CB     | 78  | M   | 63        | 7.2 | FREQ        | VI         | e4+    | 21.46                            | 16.57        | 19.01            | 38.38              |
| 4059             | AD      | CB     | 84  | F   | 73        | 5   | FREQ        | VI         | e4+    | 21.41                            | 17.59        | 19.50            | 35.26              |
| 5033             | AD      | CB     | 93  | F   | 84        | 6.3 | FREQ        | VI         | e4+    | 20.97                            | 17.48        | 19.23            | 30.72              |
| 5126             | AD      | CB     | 76  | M   | 65        | 4.3 | FREQ        | VI         | e4+    | 19.32                            | 16.08        | 17.70            | 31.43              |
| 5144             | AD      | CB     | 85  | M   | 80        | 5   | FREQ        | VI         | e4+    | 19.42                            | 16.50        | 17.96            | 32.56              |
| 5275             | AD      | CB     | 74  | M   | 69        | 5.2 | FREQ        | VI         | e4+    | 24.78                            | 19.13        | 21.95            | 33.51              |
| 6039             | AD      | CB     | 75  | M   | 71        | 3.1 | FREQ        | VI         | e4+    | 19.77                            | 16.60        | 18.18            | 36.24              |
| 6085             | AD      | CB     | 85  | M   | 81        | 3.2 | FREQ        | V          | e4-    | 21.12                            | 16.80        | 18.96            | 36.42              |
| 7025             | AD      | CB     | 91  | F   | 89        | 5.3 | MOD         | V          | e4-    | 18.89                            | 16.12        | 17.51            | 37.07              |
| 7029             | AD      | CB     | 89  | F   | 85        | 2.3 | FREQ        | VI         | e4-    | 19.41                            | 16.11        | 17.76            | 37.17              |
| 7040             | AD      | CB     | 79  | F   | 71        | 4   | FREQ        | VI         | e4+    | 20.04                            | 16.72        | 18.38            | 37.44              |
| 7047             | AD      | CB     | 78  | F   | 69        | 2.2 | MOD         | V          | e4+    | 20.34                            | 16.64        | 18.49            | 37.76              |
| 7076             | AD      | CB     | 87  | F   | 80        | 6   | FREQ        | VI         | e4-    | 22.31                            | 17.37        | 19.84            | 37.78              |
| 8018             | AD      | CB     | 78  | F   | 71        | 5.3 | FREQ        | VI         | e4-    | 21.52                            | 17.12        | 19.32            | 38.24              |
| 8046             | AD      | CB     | 83  | M   | 74        | 8.3 | FREQ        | VI         | e4+    | 24.39                            | 20.21        | 22.30            | 38.29              |
| 8074             | AD      | CB     | 87  | F   | 75        | 5.3 | MOD         | VI         | e4+    | 21.55                            | 18.06        | 19.80            | 38.60              |
| 376              | CTRL    | CB     | 94  | F   | .         | 6   | SPARSE      | III        | e4-    | 20.64                            | 17.12        | 18.88            | 40.00              |
| 2193             | CTRL    | CB     | 90  | M   | .         | 7   | SPARSE      | II         | e4-    | 18.67                            | 15.24        | 16.96            | 33.91              |
| 2242             | CTRL    | CB     | 86  | M   | .         | 6.1 | MOD         | II         | e4+    | 18.40                            | 15.16        | 16.78            | 34.41              |
| 3055             | CTRL    | CB     | 89  | F   | .         | 5.3 | MOD         | I          | e4-    | 22.96                            | 18.42        | 20.69            | 40.00              |
| 3077             | CTRL    | CB     | 94  | M   | .         | 4.5 | MOD         | I          | e4-    | 20.53                            | 16.42        | 18.48            | 34.58              |
| 4021             | CTRL    | CB     | 95  | F   | .         | 4   | SPARSE      | I          | e4-    | 19.31                            | 15.82        | 17.57            | 34.93              |
| 4085             | CTRL    | CB     | 90  | M   | .         | 5   | ABSENT      | II         | e4-    | 19.91                            | 15.64        | 17.78            | 32.93              |
| 4193             | CTRL    | CB     | 93  | M   | .         | 4   | SPARSE      | III        | e4-    | 21.74                            | 17.37        | 19.56            | 40.00              |
| 5031             | CTRL    | CB     | 94  | M   | .         | 6   | SPARSE      | IV         | e4-    | 20.86                            | 16.91        | 18.88            | 40.00              |
| 5106             | CTRL    | CB     | 86  | M   | .         | 2.3 | ABSENT      | II         | e4-    | 20.01                            | 16.75        | 18.38            | 30.89              |
| 5123             | CTRL    | CB     | 79  | F   | .         | 3   | MOD         | II         | e4+    | 21.06                            | 16.56        | 18.81            | 40.00              |
| 6001             | CTRL    | CB     | 88  | F   | .         | 7   | ABSENT      | I          | e4-    | 19.00                            | 16.32        | 17.66            | 35.63              |
| 6017             | CTRL    | CB     | 77  | F   | .         | 5.4 | ABSENT      | II         | e4-    | 21.82                            | 18.27        | 20.04            | 36.18              |
| 6095             | CTRL    | CB     | 79  | F   | .         | 2.3 | ABSENT      | II         | e4-    | 19.08                            | 15.90        | 17.49            | 36.66              |
| 6101             | CTRL    | CB     | 87  | M   | .         | 7.3 | SPARSE      | II         | e4-    | 19.74                            | 16.55        | 18.14            | 36.91              |
| 7031             | CTRL    | CB     | 92  | F   | .         | 5.3 | ABSENT      | II         | e4-    | 22.11                            | 18.45        | 20.28            | 37.31              |
| 7042             | CTRL    | CB     | 82  | F   | .         | 3   | SPARSE      | III        | e4-    | 19.57                            | 16.45        | 18.01            | 37.46              |
| 7089             | CTRL    | CB     | 81  | M   | .         | 6   | SPARSE      | II         | e4-    | 21.26                            | 17.01        | 19.14            | 38.05              |
| 8017             | CTRL    | CB     | 85  | M   | .         | 4.3 | SPARSE      | III        | e4+    | 20.40                            | 16.35        | 18.37            | 38.18              |
| 8053             | CTRL    | CB     | 82  | F   | .         | 3.3 | SPARSE      | III        | e4+    | 21.13                            | 16.71        | 18.92            | 38.41              |
| 8066             | CTRL    | CB     | 84  | M   | .         | 2.3 | MOD         | III        | e4-    | 22.35                            | 17.82        | 20.08            | 38.54              |
| 406              | AD      | HP     | 87  | F   | 83        | 5   | MOD         | VI         | e4-    | 21.00                            | 17.48        | 19.24            | 38.77              |
| 2257             | AD      | HP     | 60  | F   | 55        | 7.3 | MOD         | IV         | e4-    | 23.30                            | 18.77        | 21.04            | 39.18              |
| 3010             | AD      | HP     | 82  | M   | 76        | 8   | FREQ        | IV         | e4+    | 20.60                            | 16.25        | 18.42            | 39.34              |
| 3027             | AD      | HP     | 78  | M   | 62        | 4.2 | MOD         | V          | e4+    | 22.79                            | 18.38        | 20.58            | 39.93              |
| 3076             | AD      | HP     | 81  | M   | 68        | 5   | FREQ        | V          | e4+    | 21.47                            | 17.58        | 19.52            | 34.51              |
| 3171             | AD      | HP     | 78  | M   | 63        | 7.2 | FREQ        | VI         | e4+    | 22.11                            | 17.70        | 19.91            | 38.41              |
| 4059             | AD      | HP     | 84  | F   | 73        | 5   | FREQ        | VI         | e4+    | 22.69                            | 18.81        | 20.75            | 35.37              |
| 5033             | AD      | HP     | 93  | F   | 84        | 6.3 | FREQ        | VI         | e4+    | 19.36                            | 16.26        | 17.81            | 30.87              |
| 5126             | AD      | HP     | 76  | M   | 65        | 4.3 | FREQ        | VI         | e4+    | 20.52                            | 17.70        | 19.11            | 32.11              |
| 5144             | AD      | HP     | 85  | M   | 80        | 5   | FREQ        | VI         | e4+    | 21.59                            | 18.43        | 20.01            | 32.88              |
| 5275             | AD      | HP     | 74  | M   | 69        | 5.2 | FREQ        | VI         | e4+    | 27.41                            | 20.32        | 23.87            | 33.74              |
| 6039             | AD      | HP     | 75  | M   | 71        | 3.1 | FREQ        | VI         | e4+    | 20.87                            | 17.16        | 19.02            | 36.24              |
| 6085             | AD      | HP     | 85  | M   | 81        | 3.2 | FREQ        | V          | e4-    | 21.18                            | 17.69        | 19.43            | 36.59              |

Supplemental Table 2

| Sample Variables |         |        |     |     |           |     |             |            |        | Endogenous Housekeeping Controls |              |                  |                    |
|------------------|---------|--------|-----|-----|-----------|-----|-------------|------------|--------|----------------------------------|--------------|------------------|--------------------|
| SampleID         | Disease | Region | AGE | SEX | Onset Age | PMI | PlaqueScore | BraakStage | APOEε4 | RNU44_MeanCT                     | RNU48_MeanCT | meanPositiveEndo | ath-miR159a_MeanCT |
| 7025             | AD      | HP     | 91  | F   | 89        | 5.3 | MOD         | V          | e4-    | 19.86                            | 16.92        | 18.39            | 37.07              |
| 7029             | AD      | HP     | 89  | F   | 85        | 2.3 | FREQ        | VI         | e4-    | 20.45                            | 17.18        | 18.81            | 37.22              |
| 7040             | AD      | HP     | 79  | F   | 71        | 4   | FREQ        | VI         | e4+    | 21.39                            | 18.11        | 19.75            | 37.45              |
| 7047             | AD      | HP     | 78  | F   | 69        | 2.2 | MOD         | V          | e4+    | 21.52                            | 17.76        | 19.64            | 37.77              |
| 7076             | AD      | HP     | 87  | F   | 80        | 6   | FREQ        | VI         | e4-    | 21.87                            | 16.96        | 19.42            | 37.86              |
| 8018             | AD      | HP     | 78  | F   | 71        | 5.3 | FREQ        | VI         | e4-    | 23.05                            | 18.41        | 20.73            | 38.28              |
| 8046             | AD      | HP     | 83  | M   | 74        | 8.3 | FREQ        | VI         | e4+    | 22.26                            | 17.86        | 20.06            | 38.37              |
| 8074             | AD      | HP     | 87  | F   | 75        | 5.3 | MOD         | VI         | e4+    | 21.41                            | 17.65        | 19.53            | 38.63              |
| 376              | CTRL    | HP     | 94  | F   | .         | 6   | SPARSE      | III        | e4-    | 22.83                            | 18.78        | 20.80            | 40.00              |
| 2193             | CTRL    | HP     | 90  | M   | .         | 7   | SPARSE      | II         | e4-    | 18.74                            | 15.28        | 17.01            | 34.18              |
| 2242             | CTRL    | HP     | 86  | M   | .         | 6.1 | MOD         | II         | e4+    | 18.87                            | 15.64        | 17.25            | 34.49              |
| 3055             | CTRL    | HP     | 89  | F   | .         | 5.3 | MOD         | I          | e4-    | 20.43                            | 17.08        | 18.75            | 40.00              |
| 3077             | CTRL    | HP     | 94  | M   | .         | 4.5 | MOD         | I          | e4-    | 19.35                            | 15.82        | 17.59            | 34.78              |
| 4021             | CTRL    | HP     | 95  | F   | .         | 4   | SPARSE      | I          | e4-    | 20.32                            | 17.03        | 18.67            | 35.04              |
| 4085             | CTRL    | HP     | 90  | M   | .         | 5   | ABSENT      | II         | e4-    | 20.39                            | 16.53        | 18.46            | 33.27              |
| 4193             | CTRL    | HP     | 93  | M   | .         | 4   | SPARSE      | III        | e4-    | 20.59                            | 17.33        | 18.96            | 40.00              |
| 5031             | CTRL    | HP     | 94  | M   | .         | 6   | SPARSE      | IV         | e4-    | 22.09                            | 18.20        | 20.15            | 40.00              |
| 5106             | CTRL    | HP     | 86  | M   | .         | 2.3 | ABSENT      | II         | e4-    | 20.71                            | 17.70        | 19.20            | 31.03              |
| 5123             | CTRL    | HP     | 79  | F   | .         | 3   | MOD         | II         | e4+    | 21.59                            | 17.42        | 19.50            | 40.00              |
| 6001             | CTRL    | HP     | 88  | F   | .         | 7   | ABSENT      | I          | e4-    | 23.28                            | 20.38        | 21.83            | 35.92              |
| 6017             | CTRL    | HP     | 77  | F   | .         | 5.4 | ABSENT      | II         | e4-    | 19.89                            | 16.45        | 18.17            | 36.24              |
| 6095             | CTRL    | HP     | 79  | F   | .         | 2.3 | ABSENT      | II         | e4-    | 19.55                            | 16.80        | 18.18            | 36.78              |
| 6101             | CTRL    | HP     | 87  | M   | .         | 7.3 | SPARSE      | II         | e4-    | 20.22                            | 17.19        | 18.71            | 36.98              |
| 7031             | CTRL    | HP     | 92  | F   | .         | 5.3 | ABSENT      | II         | e4-    | 19.11                            | 15.91        | 17.51            | 37.41              |
| 7042             | CTRL    | HP     | 82  | F   | .         | 3   | SPARSE      | III        | e4-    | 19.91                            | 17.25        | 18.58            | 37.69              |
| 7089             | CTRL    | HP     | 81  | M   | .         | 6   | SPARSE      | II         | e4-    | 21.06                            | 17.88        | 19.47            | 38.13              |
| 8017             | CTRL    | HP     | 85  | M   | .         | 4.3 | SPARSE      | III        | e4+    | 21.17                            | 17.49        | 19.33            | 38.23              |
| 8053             | CTRL    | HP     | 82  | F   | .         | 3.3 | SPARSE      | III        | e4+    | 20.96                            | 17.70        | 19.33            | 38.42              |
| 8066             | CTRL    | HP     | 84  | M   | .         | 2.3 | MOD         | III        | e4-    | 21.63                            | 18.33        | 19.98            | 38.56              |

Supplemental Table 2

| SampleID | Raw CT Replicate Means |               |                  |               |               |               |               |                |               |                  |               |                  |  |
|----------|------------------------|---------------|------------------|---------------|---------------|---------------|---------------|----------------|---------------|------------------|---------------|------------------|--|
|          | MIR-211MeanCT          | MIR-204MeanCT | MIR-139-5pMeanCT | MIR-328MeanCT | MIR-132MeanCT | MIR-126MeanCT | MIR-138MeanCT | MIR-208bMeanCT | MIR-191MeanCT | MIR-331-3pMeanCT | MIR-149MeanCT | MIR-342-3pMeanCT |  |
| 406      | 18.51                  | 18.30         | 23.08            | 20.70         | 21.08         | 18.18         | 20.89         | 40.00          | 16.96         | 19.92            | 18.56         | 15.63            |  |
| 2257     | 19.21                  | 18.36         | 23.69            | 20.31         | 19.91         | 18.82         | 19.84         | 40.00          | 17.71         | 20.28            | 18.36         | 15.97            |  |
| 3010     | 28.18                  | 20.22         | 25.73            | 20.96         | 21.94         | 19.42         | 21.48         | 40.00          | 18.62         | 20.45            | 19.32         | 16.96            |  |
| 3027     | 15.64                  | 16.23         | 20.83            | 20.11         | 19.73         | 16.78         | 18.68         | 40.00          | 16.52         | 19.34            | 17.85         | 14.65            |  |
| 3076     | 17.99                  | 17.16         | 21.78            | 19.50         | 19.23         | 18.20         | 19.63         | 40.00          | 17.43         | 19.23            | 17.28         | 15.36            |  |
| 3171     | 27.06                  | 18.96         | 22.66            | 20.34         | 20.76         | 18.22         | 26.38         | 40.00          | 17.78         | 19.73            | 18.51         | 15.96            |  |
| 4059     | 17.99                  | 19.50         | 23.86            | 20.72         | 22.96         | 20.90         | 22.08         | 40.00          | 19.33         | 20.98            | 19.12         | 17.95            |  |
| 5033     | 21.99                  | 20.69         | 24.68            | 20.04         | 22.99         | 21.54         | 21.75         | 33.39          | 19.27         | 20.27            | 18.28         | 17.83            |  |
| 5126     | 17.83                  | 17.17         | 21.91            | 18.99         | 20.18         | 16.92         | 19.14         | 40.00          | 16.33         | 18.60            | 17.88         | 14.00            |  |
| 5144     | 16.26                  | 19.37         | 17.30            | 19.37         | 19.04         | 19.62         | 17.46         | 19.17          | 40.00         | 17.98            | 20.10         | 17.42            |  |
| 5275     | 24.83                  | 24.63         | 30.78            | 20.57         | 22.46         | 22.40         | 22.69         | 40.00          | 20.16         | 20.82            | 25.01         | 20.64            |  |
| 6039     | 18.08                  | 16.91         | 21.40            | 19.52         | 20.80         | 19.48         | 20.68         | 33.16          | 18.41         | 20.05            | 17.75         | 15.99            |  |
| 6085     | 15.54                  | 16.53         | 20.02            | 20.57         | 20.46         | 17.70         | 20.16         | 40.00          | 17.27         | 20.11            | 18.53         | 15.94            |  |
| 7025     | 15.83                  | 15.45         | 20.26            | 19.42         | 19.62         | 17.58         | 19.50         | 32.12          | 16.19         | 18.69            | 17.14         | 14.40            |  |
| 7029     | 15.90                  | 15.53         | 19.87            | 18.98         | 20.08         | 17.82         | 19.92         | 40.00          | 17.30         | 19.22            | 17.49         | 15.43            |  |
| 7040     | 16.72                  | 17.02         | 21.14            | 20.55         | 20.98         | 19.02         | 20.44         | 40.00          | 17.98         | 20.21            | 18.47         | 15.86            |  |
| 7047     | 17.75                  | 16.14         | 21.67            | 20.45         | 20.28         | 18.54         | 20.62         | 40.00          | 17.42         | 19.65            | 17.50         | 15.49            |  |
| 7076     | 19.07                  | 17.95         | 22.27            | 21.44         | 22.14         | 20.25         | 21.70         | 40.00          | 19.15         | 21.40            | 18.83         | 17.24            |  |
| 8018     | 18.55                  | 17.05         | 22.28            | 21.60         | 20.90         | 18.02         | 20.29         | 40.00          | 17.27         | 19.89            | 19.31         | 15.09            |  |
| 8046     | 27.36                  | 25.35         | 25.10            | 22.42         | 26.88         | 25.75         | 25.31         | 40.00          | 21.91         | 24.68            | 22.87         | 21.45            |  |
| 8074     | 17.84                  | 16.89         | 22.67            | 21.31         | 22.31         | 19.09         | 21.62         | 40.00          | 18.43         | 20.76            | 19.19         | 16.56            |  |
| 376      | 16.52                  | 17.20         | 21.74            | 21.18         | 20.41         | 19.23         | 20.69         | 40.00          | 18.16         | 20.31            | 18.30         | 16.24            |  |
| 2193     | 17.98                  | 17.70         | 21.84            | 19.01         | 19.85         | 16.99         | 20.38         | 40.00          | 17.43         | 18.81            | 16.86         | 15.48            |  |
| 2242     | 16.22                  | 17.23         | 18.42            | 19.13         | 19.25         | 19.52         | 20.27         | 40.00          | 16.64         | 19.42            | 16.56         | 15.18            |  |
| 3055     | 17.53                  | 19.77         | 23.47            | 21.45         | 21.87         | 19.61         | 22.38         | 40.00          | 19.57         | 21.21            | 20.33         | 18.51            |  |
| 3077     | 14.99                  | 14.52         | 20.71            | 21.34         | 19.50         | 15.73         | 18.48         | 40.00          | 16.42         | 18.61            | 17.37         | 13.76            |  |
| 4021     | 16.26                  | 16.39         | 20.76            | 19.71         | 19.92         | 18.25         | 20.49         | 40.00          | 17.10         | 18.63            | 17.58         | 15.67            |  |
| 4085     | 17.59                  | 18.13         | 22.20            | 20.07         | 21.34         | 21.10         | 21.23         | 40.00          | 18.07         | 19.64            | 19.32         | 16.14            |  |
| 4193     | 18.15                  | 17.31         | 23.32            | 21.60         | 21.11         | 18.90         | 21.22         | 40.00          | 18.20         | 20.27            | 19.47         | 16.53            |  |
| 5031     | 19.93                  | 18.89         | 23.66            | 19.01         | 20.08         | 19.03         | 21.66         | 29.02          | 17.84         | 19.88            | 18.23         | 16.16            |  |
| 5106     | 16.63                  | 18.11         | 22.12            | 19.84         | 21.33         | 21.16         | 21.65         | 40.00          | 19.33         | 19.81            | 17.98         | 17.00            |  |
| 5123     | 19.28                  | 19.81         | 24.29            | 19.47         | 21.32         | 20.06         | 21.64         | 40.00          | 18.31         | 19.87            | 19.15         | 17.08            |  |
| 6001     | 14.83                  | 15.17         | 19.93            | 19.09         | 20.10         | 17.18         | 20.03         | 40.00          | 16.76         | 18.35            | 17.35         | 14.69            |  |
| 6017     | 25.53                  | 18.11         | 22.95            | 21.93         | 22.10         | 20.14         | 22.68         | 40.00          | 19.56         | 21.72            | 19.65         | 17.54            |  |
| 6095     | 13.54                  | 16.33         | 21.23            | 19.66         | 19.13         | 17.77         | 20.01         | 40.00          | 16.71         | 18.72            | 17.11         | 15.04            |  |
| 6101     | 17.40                  | 17.03         | 21.18            | 20.05         | 20.91         | 18.85         | 20.93         | 29.22          | 18.27         | 19.62            | 17.99         | 16.08            |  |
| 7031     | 17.87                  | 22.24         | 23.81            | 21.13         | 24.72         | 24.38         | 24.89         | 40.00          | 21.46         | 23.12            | 21.02         | 20.92            |  |
| 7042     | 16.99                  | 15.89         | 21.20            | 19.98         | 19.85         | 18.41         | 20.79         | 40.00          | 17.15         | 19.18            | 17.47         | 15.06            |  |
| 7089     | 17.74                  | 17.26         | 22.93            | 20.51         | 20.91         | 18.75         | 21.23         | 40.00          | 18.05         | 19.88            | 18.73         | 15.90            |  |
| 8017     | 17.41                  | 16.72         | 22.16            | 19.79         | 19.22         | 18.24         | 20.70         | 40.00          | 17.03         | 19.04            | 17.76         | 15.35            |  |
| 8053     | 15.47                  | 18.23         | 22.37            | 21.07         | 20.90         | 18.44         | 21.29         | 40.00          | 17.20         | 20.22            | 18.78         | 16.00            |  |
| 8066     | 33.81                  | 20.09         | 25.02            | 20.46         | 20.62         | 19.54         | 21.91         | 40.00          | 18.66         | 20.57            | 19.62         | 16.93            |  |
| 406      | 17.38                  | 19.83         | 18.38            | 20.33         | 20.66         | 19.20         | 18.93         | 40.00          | 18.69         | 21.17            | 18.78         | 17.91            |  |
| 2257     | 22.13                  | 21.42         | 18.92            | 20.12         | 20.42         | 18.81         | 19.16         | 40.00          | 18.85         | 21.56            | 19.02         | 17.79            |  |
| 3010     | 21.55                  | 21.38         | 18.54            | 18.78         | 19.05         | 19.03         | 19.37         | 39.20          | 18.56         | 19.77            | 18.66         | 17.33            |  |
| 3027     | 17.37                  | 20.31         | 19.55            | 20.96         | 20.51         | 19.17         | 20.50         | 40.00          | 18.00         | 21.38            | 18.54         | 17.57            |  |
| 3076     | 20.00                  | 18.90         | 17.56            | 21.61         | 20.32         | 18.99         | 19.46         | 40.00          | 18.20         | 21.16            | 18.62         | 17.82            |  |
| 3171     | 22.36                  | 21.45         | 19.86            | 20.51         | 21.11         | 19.38         | 20.66         | 40.00          | 18.77         | 21.61            | 19.35         | 18.03            |  |
| 4059     | 19.11                  | 22.66         | 20.04            | 21.56         | 22.72         | 21.89         | 22.06         | 40.00          | 20.81         | 22.22            | 19.89         | 19.60            |  |
| 5033     | 21.27                  | 20.34         | 16.98            | 18.51         | 19.23         | 20.88         | 19.71         | 40.00          | 19.30         | 28.06            | 16.76         | 17.49            |  |
| 5126     | 20.19                  | 19.56         | 18.13            | 21.25         | 21.56         | 20.78         | 20.59         | 40.00          | 19.72         | 21.75            | 18.60         | 18.77            |  |
| 5144     | 17.03                  | 18.38         | 22.80            | 20.80         | 21.23         | 19.58         | 21.05         | 40.00          | 19.95         | 21.67            | 19.31         | 17.36            |  |
| 5275     | 38.44                  | 33.01         | 29.55            | 20.47         | 21.58         | 21.46         | 21.55         | 40.00          | 20.46         | 21.00            | 24.87         | 20.94            |  |
| 6039     | 17.02                  | 19.29         | 16.80            | 20.45         | 19.61         | 19.39         | 18.69         | 40.00          | 18.11         | 20.75            | 18.06         | 17.26            |  |
| 6085     | 16.33                  | 19.35         | 17.84            | 20.54         | 19.87         | 19.17         | 21.13         | 40.00          | 17.97         | 21.01            | 18.20         | 16.70            |  |

Supplemental Table 2

| SampleID | Raw CT Replicate Means |               |                  |               |               |               |               |                |               |                  |               |                  |
|----------|------------------------|---------------|------------------|---------------|---------------|---------------|---------------|----------------|---------------|------------------|---------------|------------------|
|          | MIR-211MeanCT          | MIR-204MeanCT | MIR-139-5pMeanCT | MIR-328MeanCT | MIR-132MeanCT | MIR-126MeanCT | MIR-138MeanCT | MIR-208bMeanCT | MIR-191MeanCT | MIR-331-3pMeanCT | MIR-149MeanCT | MIR-342-3pMeanCT |
| 7025     | 16.93                  | 19.51         | 17.04            | 18.71         | 18.35         | 18.21         | 18.24         | 34.61          | 18.10         | 20.52            | 17.31         | 16.86            |
| 7029     | 18.37                  | 19.56         | 17.24            | 20.78         | 21.41         | 19.14         | 20.06         | 40.00          | 18.86         | 21.69            | 18.68         | 17.63            |
| 7040     | 17.15                  | 20.46         | 17.45            | 20.90         | 20.63         | 20.20         | 20.08         | 40.00          | 18.87         | 21.21            | 18.00         | 17.53            |
| 7047     | 16.09                  | 19.81         | 18.71            | 20.43         | 20.14         | 19.76         | 20.08         | 40.00          | 18.95         | 21.75            | 18.49         | 17.69            |
| 7076     | 21.04                  | 19.81         | 18.50            | 20.98         | 21.03         | 20.05         | 20.01         | 40.00          | 18.12         | 21.64            | 19.16         | 16.64            |
| 8018     | 19.42                  | 22.59         | 19.52            | 22.16         | 20.97         | 20.12         | 20.79         | 40.00          | 19.02         | 22.11            | 20.44         | 18.55            |
| 8046     | 22.89                  | 23.95         | 21.71            | 20.31         | 19.99         | 19.34         | 18.80         | 40.00          | 18.86         | 21.14            | 19.53         | 17.95            |
| 8074     | 15.85                  | 19.92         | 18.26            | 20.43         | 19.85         | 18.91         | 19.41         | 40.00          | 17.88         | 21.16            | 18.29         | 17.34            |
| 376      | 17.28                  | 18.91         | 18.89            | 20.79         | 19.14         | 17.57         | 18.54         | 40.00          | 18.66         | 21.58            | 19.46         | 18.00            |
| 2193     | 15.36                  | 18.71         | 15.65            | 18.47         | 17.90         | 17.24         | 17.02         | 40.00          | 16.61         | 25.76            | 16.51         | 15.31            |
| 2242     | 19.47                  | 18.19         | 16.08            | 18.75         | 17.36         | 18.39         | 17.74         | 40.00          | 16.94         | 19.73            | 16.89         | 16.43            |
| 3055     | 17.05                  | 19.85         | 18.01            | 19.69         | 18.91         | 18.46         | 18.60         | 40.00          | 18.08         | 20.27            | 18.04         | 17.23            |
| 3077     | 14.49                  | 18.63         | 16.55            | 19.41         | 18.54         | 18.01         | 17.93         | 40.00          | 17.39         | 19.97            | 17.15         | 16.46            |
| 4021     | 21.17                  | 20.25         | 17.97            | 20.37         | 20.13         | 19.43         | 20.30         | 40.00          | 18.62         | 20.80            | 18.47         | 18.05            |
| 4085     | 20.82                  | 21.74         | 17.61            | 20.04         | 21.19         | 21.63         | 20.42         | 40.00          | 19.96         | 21.16            | 18.64         | 18.70            |
| 4193     | 16.90                  | 20.40         | 19.50            | 20.45         | 20.92         | 18.97         | 18.45         | 40.00          | 17.26         | 20.13            | 18.36         | 16.96            |
| 5031     | 18.29                  | 16.89         | 22.52            | 21.69         | 22.38         | 20.52         | 22.78         | 40.00          | 19.14         | 22.08            | 21.37         | 18.68            |
| 5106     | 18.79                  | 19.38         | 18.11            | 20.78         | 20.92         | 19.52         | 20.99         | 40.00          | 19.95         | 21.69            | 18.56         | 18.95            |
| 5123     | 18.74                  | 22.83         | 20.14            | 19.93         | 18.49         | 18.30         | 18.22         | 40.00          | 18.44         | 20.87            | 19.20         | 17.62            |
| 6001     | 23.75                  | 23.30         | 20.24            | 22.25         | 23.53         | 22.47         | 22.77         | 38.81          | 21.78         | 23.82            | 21.27         | 21.07            |
| 6017     | 19.31                  | 19.24         | 17.41            | 20.08         | 20.02         | 19.46         | 19.99         | 40.00          | 17.72         | 20.50            | 17.66         | 16.81            |
| 6095     | 20.21                  | 19.91         | 17.45            | 19.50         | 18.93         | 18.84         | 18.52         | 40.00          | 18.39         | 19.77            | 18.27         | 16.43            |
| 6101     | 17.86                  | 21.01         | 17.96            | 19.88         | 19.11         | 19.17         | 18.84         | 40.00          | 19.02         | 21.11            | 18.99         | 18.37            |
| 7031     | 18.11                  | 20.58         | 16.91            | 18.72         | 17.84         | 18.28         | 18.10         | 40.00          | 17.79         | 19.96            | 17.38         | 16.64            |
| 7042     | 18.84                  | 21.10         | 17.25            | 19.00         | 18.65         | 20.08         | 18.80         | 40.00          | 18.44         | 19.78            | 17.21         | 16.77            |
| 7089     | 18.65                  | 21.63         | 17.96            | 19.75         | 18.41         | 18.84         | 18.67         | 40.00          | 18.04         | 20.76            | 18.54         | 17.28            |
| 8017     | 19.46                  | 21.17         | 19.62            | 19.53         | 18.08         | 18.44         | 18.91         | 40.00          | 18.35         | 21.01            | 18.46         | 17.76            |
| 8053     | 18.69                  | 19.76         | 18.09            | 19.81         | 19.14         | 18.02         | 18.40         | 37.22          | 18.28         | 21.03            | 18.17         | 17.38            |
| 8066     | 21.83                  | 20.81         | 19.29            | 21.20         | 19.71         | 20.75         | 19.87         | 40.00          | 19.39         | 22.09            | 19.56         | 18.92            |



Supplemental Table 2

| SampleID | MIR-370MeanCT | MIR-330-3pMeanCT | MIR-15aMeanCT | MIR-501MeanCT | MIR-98MeanCT | MIR-346MeanCT | MIR-152MeanCT | MIR-181cMeanCT | MIR-184MeanCT |
|----------|---------------|------------------|---------------|---------------|--------------|---------------|---------------|----------------|---------------|
| 406      | 22.67         | 24.72            | 24.04         | 25.94         | 23.61        | 22.50         | 25.74         | 27.74          | 25.79         |
| 2257     | 22.98         | 25.02            | 23.32         | 26.25         | 27.32        | 25.39         | 26.94         | 26.94          | 27.40         |
| 3010     | 23.44         | 25.40            | 24.24         | 25.92         | 26.71        | 40.00         | 27.83         | 28.73          | 27.77         |
| 3027     | 23.09         | 22.82            | 20.78         | 24.35         | 21.97        | 22.40         | 24.08         | 24.69          | 24.99         |
| 3076     | 21.84         | 23.49            | 23.59         | 23.70         | 22.65        | 23.31         | 26.59         | 26.94          | 25.61         |
| 3171     | 23.43         | 24.13            | 23.10         | 26.29         | 24.77        | 24.36         | 26.30         | 26.76          | 25.79         |
| 4059     | 23.14         | 26.00            | 26.37         | 25.43         | 28.97        | 27.09         | 28.20         | 29.36          | 27.20         |
| 5033     | 22.54         | 25.85            | 26.00         | 28.22         | 26.60        | 24.17         | 28.53         | 28.90          | 27.84         |
| 5126     | 22.30         | 23.87            | 23.22         | 18.98         | 23.42        | 23.11         | 24.95         | 26.56          | 25.40         |
| 5144     | 21.64         | 24.69            | 24.97         | 26.88         | 23.10        | 22.72         | 25.83         | 28.16          | 26.13         |
| 5275     | 24.82         | 28.70            | 29.01         | 29.86         | 40.00        | 27.73         | 30.34         | 31.00          | 29.98         |
| 6039     | 22.80         | 23.97            | 24.48         | 23.89         | 24.17        | 24.16         | 26.78         | 26.63          | 25.68         |
| 6085     | 22.66         | 24.41            | 25.08         | 26.34         | 25.88        | 23.72         | 25.70         | 26.30          | 26.65         |
| 7025     | 22.36         | 23.49            | 22.89         | 24.43         | 24.18        | 23.03         | 27.12         | 27.34          | 26.40         |
| 7029     | 22.70         | 23.85            | 22.45         | 24.97         | 23.40        | 23.45         | 25.93         | 26.65          | 25.51         |
| 7040     | 23.32         | 23.89            | 24.80         | 24.61         | 23.89        | 24.32         | 27.09         | 26.73          | 25.83         |
| 7047     | 22.54         | 24.41            | 23.49         | 26.93         | 22.44        | 23.09         | 26.11         | 27.13          | 25.90         |
| 7076     | 23.47         | 25.12            | 27.17         | 29.19         | 27.22        | 25.31         | 26.73         | 27.42          | 26.88         |
| 8018     | 23.20         | 24.37            | 24.36         | 26.99         | 24.76        | 26.97         | 25.99         | 27.69          | 26.46         |
| 8046     | 22.63         | 27.36            | 27.09         | 36.21         | 30.38        | 29.39         | 29.71         | 29.17          | 30.97         |
| 8074     | 23.21         | 25.12            | 23.58         | 28.10         | 26.82        | 27.59         | 27.60         | 27.93          | 27.83         |
| 376      | 22.51         | 24.52            | 22.84         | 25.34         | 23.91        | 23.92         | 26.91         | 28.21          | 27.02         |
| 2193     | 21.89         | 23.85            | 22.14         | 25.13         | 23.45        | 23.86         | 25.45         | 26.09          | 24.91         |
| 2242     | 21.45         | 23.16            | 23.48         | 23.63         | 24.14        | 22.26         | 25.35         | 26.48          | 24.56         |
| 3055     | 22.78         | 26.00            | 24.06         | 30.80         | 28.58        | 27.04         | 27.15         | 29.16          | 29.45         |
| 3077     | 23.34         | 22.62            | 21.04         | 23.65         | 21.55        | 24.73         | 24.40         | 25.18          | 25.76         |
| 4021     | 22.10         | 24.04            | 21.83         | 26.01         | 22.73        | 24.00         | 26.77         | 26.31          | 25.74         |
| 4085     | 22.40         | 25.38            | 24.07         | 26.29         | 32.07        | 23.69         | 29.77         | 29.27          | 26.67         |
| 4193     | 23.13         | 25.96            | 22.83         | 27.55         | 25.59        | 25.68         | 27.43         | 28.00          | 27.52         |
| 5031     | 22.29         | 25.26            | 24.31         | 24.56         | 23.63        | 23.29         | 27.06         | 27.16          | 26.61         |
| 5106     | 22.40         | 24.63            | 29.21         | 26.19         | 26.30        | 22.97         | 27.84         | 28.23          | 27.13         |
| 5123     | 22.53         | 25.31            | 24.18         | 27.37         | 23.96        | 24.60         | 26.33         | 28.33          | 26.47         |
| 6001     | 22.17         | 23.61            | 23.28         | 24.51         | 21.68        | 23.02         | 25.78         | 26.47          | 25.24         |
| 6017     | 23.75         | 26.90            | 24.89         | 26.96         | 25.44        | 26.72         | 28.27         | 28.60          | 27.17         |
| 6095     | 21.59         | 23.83            | 22.66         | 24.56         | 22.57        | 23.35         | 25.87         | 26.86          | 25.76         |
| 6101     | 22.69         | 24.16            | 23.45         | 24.48         | 22.94        | 23.81         | 27.52         | 26.94          | 25.27         |
| 7031     | 23.04         | 27.31            | 28.49         | 27.94         | 40.00        | 24.91         | 29.18         | 29.12          | 29.46         |
| 7042     | 22.17         | 23.48            | 21.31         | 25.44         | 23.77        | 22.99         | 26.82         | 27.48          | 26.79         |
| 7089     | 22.18         | 24.52            | 20.97         | 26.94         | 24.44        | 24.13         | 27.18         | 27.79          | 27.96         |
| 8017     | 21.36         | 24.35            | 21.77         | 27.15         | 23.64        | 23.90         | 25.81         | 26.25          | 26.18         |
| 8053     | 27.09         | 24.87            | 22.27         | 25.92         | 24.81        | 24.17         | 26.09         | 29.07          | 26.99         |
| 8066     | 22.41         | 25.92            | 24.55         | 26.26         | 24.42        | 25.59         | 26.47         | 27.22          | 28.08         |
| 406      | 21.13         | 24.52            | 26.78         | 29.26         | 25.94        | 22.88         | 26.92         | 29.01          | 29.20         |
| 2257     | 21.76         | 25.30            | 27.67         | 27.48         | 24.18        | 24.49         | 27.16         | 27.76          | 27.98         |
| 3010     | 21.47         | 24.15            | 23.47         | 27.09         | 28.69        | 24.18         | 27.02         | 26.87          | 23.79         |
| 3027     | 22.27         | 24.96            | 25.51         | 27.21         | 27.16        | 22.95         | 26.31         | 26.75          | 27.87         |
| 3076     | 21.68         | 25.04            | 27.41         | 28.99         | 24.31        | 24.95         | 26.25         | 28.24          | 24.36         |
| 3171     | 22.59         | 25.28            | 23.38         | 31.09         | 27.49        | 26.14         | 26.11         | 28.05          | 28.63         |
| 4059     | 22.69         | 27.03            | 27.04         | 37.98         | 29.98        | 23.73         | 30.28         | 30.44          | 31.17         |
| 5033     | 21.47         | 24.44            | 25.12         | 25.66         | 28.02        | 23.03         | 27.68         | 27.91          | 27.60         |
| 5126     | 21.94         | 25.08            | 27.37         | 29.22         | 28.76        | 23.69         | 27.31         | 29.50          | 26.29         |
| 5144     | 22.66         | 26.65            | 24.97         | 25.02         | 27.19        | 24.45         | 28.84         | 30.04          | 28.96         |
| 5275     | 25.29         | 28.90            | 31.25         | 30.34         | 40.00        | 27.34         | 28.65         | 31.08          | 31.63         |
| 6039     | 21.54         | 24.41            | 23.27         | 28.23         | 25.53        | 23.51         | 26.34         | 27.63          | 23.25         |
| 6085     | 21.80         | 24.25            | 26.37         | 26.50         | 28.67        | 26.08         | 27.11         | 26.74          | 27.85         |

Supplemental Table 2

| SampleID | MIR-370MeanCT | MIR-330-3pMeanCT | MIR-15aMeanCT | MIR-501MeanCT | MIR-98MeanCT | MIR-346MeanCT | MIR-152MeanCT | MIR-181cMeanCT | MIR-184MeanCT |
|----------|---------------|------------------|---------------|---------------|--------------|---------------|---------------|----------------|---------------|
| 7025     | 21.78         | 23.86            | 28.67         | 27.10         | 23.65        | 24.23         | 25.97         | 26.51          | 22.55         |
| 7029     | 22.39         | 26.15            | 27.81         | 26.74         | 27.75        | 23.76         | 26.21         | 29.50          | 27.89         |
| 7040     | 22.20         | 24.66            | 26.30         | 31.78         | 27.97        | 24.62         | 27.91         | 27.76          | 25.51         |
| 7047     | 21.92         | 24.34            | 31.61         | 30.06         | 24.35        | 23.02         | 26.46         | 27.77          | 26.26         |
| 7076     | 22.17         | 24.29            | 25.24         | 27.30         | 30.81        | 23.85         | 27.39         | 28.11          | 26.92         |
| 8018     | 22.58         | 25.96            | 24.70         | 28.16         | 30.93        | 25.25         | 27.79         | 29.09          | 27.42         |
| 8046     | 21.30         | 25.48            | 26.13         | 29.73         | 26.95        | 23.93         | 27.18         | 29.50          | 22.82         |
| 8074     | 21.76         | 24.10            | 29.50         | 28.40         | 26.05        | 22.93         | 26.18         | 27.07          | 27.39         |
| 376      | 22.28         | 24.88            | 24.47         | 27.79         | 24.50        | 24.48         | 24.81         | 27.03          | 21.96         |
| 2193     | 20.55         | 23.09            | 26.88         | 24.44         | 23.14        | 22.13         | 24.74         | 26.21          | 21.45         |
| 2242     | 20.98         | 23.32            | 25.91         | 25.15         | 23.66        | 23.60         | 26.07         | 26.35          | 20.26         |
| 3055     | 21.41         | 24.39            | 26.07         | 30.28         | 27.71        | 23.02         | 27.08         | 28.16          | 24.05         |
| 3077     | 20.96         | 23.95            | 26.49         | 26.13         | 23.81        | 21.81         | 25.78         | 27.43          | 21.10         |
| 4021     | 21.58         | 25.11            | 30.44         | 25.21         | 29.87        | 24.02         | 27.67         | 28.07          | 26.51         |
| 4085     | 21.06         | 26.14            | 30.65         | 37.68         | 40.00        | 27.40         | 29.98         | 30.51          | 28.23         |
| 4193     | 20.97         | 24.28            | 26.00         | 28.06         | 25.48        | 22.25         | 25.87         | 27.92          | 25.22         |
| 5031     | 22.73         | 26.34            | 28.69         | 33.88         | 29.55        | 26.51         | 26.25         | 29.16          | 29.15         |
| 5106     | 22.27         | 26.14            | 28.69         | 28.12         | 27.92        | 26.23         | 27.08         | 30.27          | 28.05         |
| 5123     | 21.27         | 24.56            | 24.99         | 31.93         | 26.63        | 23.43         | 25.57         | 28.58          | 22.11         |
| 6001     | 23.06         | 27.19            | 32.65         | 29.14         | 30.60        | 26.95         | 30.90         | 31.58          | 32.16         |
| 6017     | 21.66         | 24.13            | 30.78         | 26.18         | 26.98        | 24.45         | 26.42         | 27.38          | 26.21         |
| 6095     | 20.79         | 24.04            | 29.04         | 27.38         | 26.30        | 23.78         | 27.05         | 29.32          | 23.60         |
| 6101     | 21.31         | 25.82            | 30.43         | 30.52         | 26.00        | 24.54         | 26.96         | 28.30          | 22.26         |
| 7031     | 21.33         | 24.06            | 24.33         | 25.33         | 27.48        | 22.79         | 27.40         | 27.29          | 26.67         |
| 7042     | 21.41         | 24.00            | 31.03         | 29.88         | 25.42        | 24.43         | 28.86         | 29.08          | 28.36         |
| 7089     | 21.72         | 26.00            | 27.20         | 30.01         | 27.68        | 23.39         | 27.01         | 28.47          | 24.29         |
| 8017     | 21.99         | 25.00            | 27.38         | 30.85         | 30.06        | 23.06         | 25.47         | 27.69          | 27.47         |
| 8053     | 21.33         | 24.60            | 29.53         | 29.60         | 26.26        | 24.63         | 26.01         | 28.64          | 27.26         |
| 8066     | 21.58         | 26.04            | 30.87         | 29.09         | 26.62        | 25.12         | 27.33         | 29.40          | 22.01         |

Supplemental Table 2

| SampleID | 41-CT Replicate Means |               |                  |               |               |               |               |                |               |                  |               |                  |               |  |
|----------|-----------------------|---------------|------------------|---------------|---------------|---------------|---------------|----------------|---------------|------------------|---------------|------------------|---------------|--|
|          | MIR-211_41-CT         | MIR-204_41-CT | MIR-139-5p_41-CT | MIR-328_41-CT | MIR-132_41-CT | MIR-126_41-CT | MIR-138_41-CT | MIR-208b_41-CT | MIR-191_41-CT | MIR-331-3p_41-CT | MIR-149_41-CT | MIR-342-3p_41-CT | MIR-370_41-CT |  |
| 406      | 22.49                 | 22.70         | 17.92            | 20.30         | 19.92         | 22.82         | 20.11         | 1.00           | 24.04         | 21.08            | 22.44         | 25.37            | 18.33         |  |
| 2257     | 21.79                 | 22.64         | 17.31            | 20.69         | 21.09         | 22.18         | 21.16         | 1.00           | 23.29         | 20.72            | 22.64         | 25.03            | 18.02         |  |
| 3010     | 12.82                 | 20.78         | 15.27            | 20.04         | 19.06         | 21.58         | 19.52         | 1.00           | 22.38         | 20.55            | 21.68         | 24.04            | 17.56         |  |
| 3027     | 25.36                 | 24.77         | 20.17            | 20.89         | 21.27         | 24.22         | 22.32         | 1.00           | 24.48         | 21.66            | 23.15         | 26.35            | 17.91         |  |
| 3076     | 23.01                 | 23.84         | 19.22            | 21.50         | 21.77         | 22.80         | 21.37         | 1.00           | 23.57         | 21.77            | 23.72         | 25.64            | 19.16         |  |
| 3171     | 13.94                 | 22.04         | 18.34            | 20.66         | 20.24         | 22.78         | 14.62         | 1.00           | 23.22         | 21.27            | 22.49         | 25.04            | 17.57         |  |
| 4059     | 23.01                 | 21.50         | 17.14            | 20.28         | 18.04         | 20.10         | 18.92         | 1.00           | 21.67         | 20.02            | 21.88         | 23.05            | 17.86         |  |
| 5033     | 19.01                 | 20.31         | 16.32            | 20.96         | 18.01         | 19.46         | 19.25         | 7.61           | 21.73         | 20.73            | 22.72         | 23.17            | 18.46         |  |
| 5126     | 23.17                 | 23.83         | 19.09            | 22.01         | 20.82         | 24.08         | 21.86         | 1.00           | 24.67         | 22.40            | 23.12         | 27.00            | 18.70         |  |
| 5144     | 24.74                 | 21.63         | 23.70            | 21.96         | 21.38         | 23.54         | 21.83         | 1.00           | 23.02         | 20.90            | 23.58         | 25.27            | 19.36         |  |
| 5275     | 16.17                 | 16.37         | 10.22            | 20.43         | 18.54         | 18.60         | 18.31         | 1.00           | 20.84         | 20.18            | 15.99         | 20.36            | 16.18         |  |
| 6039     | 22.92                 | 24.09         | 19.60            | 21.48         | 20.20         | 21.52         | 20.32         | 7.84           | 22.59         | 20.95            | 23.25         | 25.01            | 18.20         |  |
| 6085     | 25.46                 | 24.47         | 20.98            | 20.43         | 20.98         | 20.54         | 20.84         | 1.00           | 23.73         | 20.89            | 22.47         | 25.06            | 18.34         |  |
| 7025     | 25.17                 | 25.55         | 20.74            | 21.58         | 21.38         | 23.42         | 21.50         | 8.88           | 24.81         | 22.31            | 23.86         | 26.60            | 18.64         |  |
| 7029     | 25.10                 | 25.47         | 21.13            | 22.02         | 20.92         | 23.18         | 21.08         | 1.00           | 23.70         | 21.78            | 23.51         | 25.57            | 18.30         |  |
| 7040     | 24.28                 | 23.98         | 19.86            | 20.45         | 20.02         | 21.98         | 20.56         | 1.00           | 23.02         | 20.79            | 22.53         | 25.14            | 17.68         |  |
| 7047     | 23.25                 | 24.86         | 19.33            | 20.55         | 20.72         | 22.46         | 20.38         | 1.00           | 23.58         | 21.35            | 23.50         | 25.51            | 18.46         |  |
| 7076     | 21.93                 | 23.05         | 18.73            | 19.56         | 18.86         | 20.75         | 19.30         | 1.00           | 21.85         | 19.60            | 22.17         | 23.76            | 17.53         |  |
| 8018     | 22.45                 | 23.95         | 18.72            | 19.40         | 20.10         | 22.98         | 20.71         | 1.00           | 23.73         | 21.11            | 21.69         | 25.91            | 17.80         |  |
| 8046     | 13.64                 | 15.65         | 15.90            | 18.58         | 14.12         | 15.25         | 15.69         | 1.00           | 19.09         | 16.32            | 18.13         | 19.55            | 18.37         |  |
| 8074     | 23.16                 | 24.11         | 18.33            | 19.69         | 18.69         | 21.91         | 19.38         | 1.00           | 22.57         | 20.24            | 21.81         | 24.44            | 17.79         |  |
| 376      | 24.48                 | 23.80         | 19.26            | 19.82         | 20.59         | 21.77         | 20.31         | 1.00           | 22.84         | 20.69            | 22.70         | 24.76            | 18.49         |  |
| 2193     | 23.02                 | 23.30         | 19.16            | 21.99         | 21.15         | 24.01         | 20.62         | 1.00           | 23.57         | 22.19            | 24.14         | 25.52            | 19.11         |  |
| 2242     | 24.78                 | 23.77         | 22.58            | 21.87         | 21.75         | 21.48         | 20.73         | 1.00           | 24.36         | 21.58            | 24.44         | 25.82            | 19.55         |  |
| 3055     | 23.47                 | 21.23         | 17.53            | 19.55         | 19.13         | 21.39         | 18.62         | 1.00           | 21.43         | 19.79            | 20.67         | 22.49            | 18.22         |  |
| 3077     | 26.01                 | 26.48         | 20.29            | 19.66         | 21.50         | 25.27         | 22.52         | 1.00           | 24.58         | 22.39            | 23.63         | 27.24            | 17.66         |  |
| 4021     | 24.74                 | 24.61         | 20.24            | 21.29         | 21.08         | 22.75         | 20.51         | 1.00           | 23.90         | 22.37            | 23.42         | 25.33            | 18.90         |  |
| 4085     | 23.41                 | 22.87         | 18.80            | 20.93         | 19.66         | 19.90         | 19.77         | 1.00           | 22.93         | 21.36            | 21.68         | 24.86            | 18.60         |  |
| 4193     | 22.85                 | 23.69         | 17.68            | 19.40         | 19.89         | 22.10         | 19.78         | 1.00           | 22.80         | 20.73            | 21.53         | 24.47            | 17.87         |  |
| 5031     | 21.07                 | 22.11         | 17.34            | 21.99         | 20.92         | 21.97         | 19.34         | 11.98          | 23.16         | 21.12            | 22.77         | 24.84            | 18.71         |  |
| 5106     | 24.37                 | 22.89         | 18.88            | 21.16         | 19.67         | 19.84         | 19.35         | 1.00           | 21.67         | 21.19            | 23.02         | 24.00            | 18.60         |  |
| 5123     | 21.72                 | 21.19         | 16.71            | 21.53         | 19.68         | 20.94         | 19.36         | 1.00           | 22.69         | 21.13            | 21.85         | 23.92            | 18.47         |  |
| 6001     | 26.17                 | 25.83         | 21.07            | 21.91         | 20.90         | 23.82         | 20.97         | 1.00           | 24.24         | 22.65            | 23.65         | 26.31            | 18.83         |  |
| 6017     | 15.47                 | 22.89         | 18.05            | 19.07         | 18.90         | 20.86         | 18.32         | 1.00           | 21.44         | 19.28            | 21.35         | 23.46            | 17.25         |  |
| 6095     | 27.46                 | 24.67         | 19.78            | 21.34         | 21.87         | 23.23         | 20.99         | 1.00           | 24.29         | 22.28            | 23.89         | 25.96            | 19.41         |  |
| 6101     | 23.60                 | 23.97         | 19.82            | 20.95         | 20.09         | 22.15         | 20.07         | 11.78          | 22.73         | 21.38            | 23.01         | 24.92            | 18.31         |  |
| 7031     | 23.13                 | 18.76         | 17.19            | 19.87         | 16.28         | 16.62         | 16.11         | 1.00           | 19.54         | 17.88            | 19.98         | 20.08            | 17.96         |  |
| 7042     | 24.01                 | 25.11         | 19.80            | 21.02         | 21.15         | 22.59         | 20.21         | 1.00           | 23.85         | 21.82            | 23.53         | 25.94            | 18.83         |  |
| 7089     | 23.26                 | 23.74         | 18.07            | 20.49         | 20.09         | 22.25         | 19.77         | 1.00           | 22.95         | 21.12            | 22.27         | 25.10            | 18.82         |  |
| 8017     | 23.59                 | 24.28         | 18.84            | 21.21         | 21.78         | 22.76         | 20.30         | 1.00           | 23.97         | 21.96            | 23.24         | 25.65            | 19.64         |  |
| 8053     | 25.53                 | 22.77         | 18.63            | 19.93         | 20.10         | 22.56         | 19.71         | 1.00           | 23.80         | 20.78            | 22.22         | 25.00            | 13.91         |  |
| 8066     | 7.19                  | 20.91         | 15.98            | 20.54         | 20.38         | 21.46         | 19.09         | 1.00           | 22.34         | 20.43            | 21.38         | 24.07            | 18.59         |  |
| 406      | 23.62                 | 21.17         | 22.62            | 20.67         | 20.34         | 21.80         | 22.07         | 1.00           | 22.31         | 19.83            | 22.22         | 23.09            | 19.87         |  |
| 2257     | 18.87                 | 19.58         | 22.08            | 20.88         | 20.58         | 22.19         | 21.84         | 1.00           | 22.15         | 19.44            | 21.98         | 23.21            | 19.24         |  |
| 3010     | 19.45                 | 19.62         | 22.46            | 22.22         | 21.95         | 21.97         | 21.63         | 1.80           | 22.44         | 21.23            | 22.34         | 23.67            | 19.53         |  |
| 3027     | 23.63                 | 20.69         | 21.45            | 20.04         | 20.49         | 21.83         | 20.50         | 1.00           | 23.00         | 19.62            | 22.46         | 23.43            | 18.73         |  |
| 3076     | 21.00                 | 22.10         | 23.44            | 19.39         | 20.68         | 22.01         | 21.54         | 1.00           | 22.80         | 19.84            | 22.38         | 23.18            | 19.32         |  |
| 3171     | 18.64                 | 19.55         | 21.14            | 20.49         | 19.89         | 21.62         | 20.34         | 1.00           | 22.23         | 19.39            | 21.65         | 22.97            | 18.41         |  |
| 4059     | 21.89                 | 18.34         | 20.96            | 19.44         | 18.28         | 19.11         | 18.94         | 1.00           | 20.19         | 18.78            | 21.11         | 21.40            | 18.31         |  |
| 5033     | 19.73                 | 20.66         | 24.02            | 22.49         | 21.77         | 20.12         | 21.29         | 1.00           | 21.70         | 12.94            | 24.24         | 23.51            | 19.53         |  |
| 5126     | 20.81                 | 21.44         | 22.87            | 19.75         | 19.44         | 20.22         | 20.41         | 1.00           | 21.28         | 19.25            | 22.40         | 22.23            | 19.06         |  |
| 5144     | 23.97                 | 22.62         | 18.20            | 20.20         | 19.77         | 21.42         | 19.95         | 1.00           | 21.05         | 19.33            | 21.69         | 23.64            | 18.34         |  |
| 5275     | 2.56                  | 7.99          | 11.45            | 20.53         | 19.42         | 19.54         | 19.45         | 1.00           | 20.54         | 20.00            | 16.13         | 20.06            | 15.71         |  |
| 6039     | 23.98                 | 21.71         | 24.20            | 20.55         | 21.39         | 21.61         | 22.31         | 1.00           | 22.89         | 20.25            | 22.94         | 23.74            | 19.46         |  |
| 6085     | 24.67                 | 21.65         | 23.16            | 20.46         | 21.13         | 21.83         | 19.87         | 1.00           | 23.03         | 19.99            | 22.80         | 24.30            | 19.20         |  |

Supplemental Table 2

| SampleID | 41-CT Replicate Means |               |                  |               |               |               |               |                |               |                  |               |                  |               |  |
|----------|-----------------------|---------------|------------------|---------------|---------------|---------------|---------------|----------------|---------------|------------------|---------------|------------------|---------------|--|
|          | MIR-211_41-CT         | MIR-204_41-CT | MIR-139-5p_41-CT | MIR-328_41-CT | MIR-132_41-CT | MIR-126_41-CT | MIR-138_41-CT | MIR-208b_41-CT | MIR-191_41-CT | MIR-331-3p_41-CT | MIR-149_41-CT | MIR-342-3p_41-CT | MIR-370_41-CT |  |
| 7025     | 24.07                 | 21.49         | 23.96            | 22.29         | 22.65         | 22.79         | 22.76         | 6.39           | 22.90         | 20.48            | 23.69         | 24.14            | 19.22         |  |
| 7029     | 22.63                 | 21.44         | 23.76            | 20.22         | 19.59         | 21.86         | 20.94         | 1.00           | 22.14         | 19.31            | 22.32         | 23.37            | 18.61         |  |
| 7040     | 23.85                 | 20.54         | 23.55            | 20.10         | 20.37         | 20.80         | 20.92         | 1.00           | 22.13         | 19.79            | 23.00         | 23.47            | 18.80         |  |
| 7047     | 24.91                 | 21.19         | 22.29            | 20.57         | 20.86         | 21.24         | 20.92         | 1.00           | 22.05         | 19.25            | 22.51         | 23.31            | 19.08         |  |
| 7076     | 19.96                 | 21.19         | 22.50            | 20.02         | 19.97         | 20.95         | 20.99         | 1.00           | 22.88         | 19.36            | 21.84         | 24.36            | 18.83         |  |
| 8018     | 21.58                 | 18.41         | 21.48            | 18.84         | 20.03         | 20.88         | 20.21         | 1.00           | 21.98         | 18.89            | 20.56         | 22.45            | 18.42         |  |
| 8046     | 18.11                 | 17.05         | 19.29            | 20.69         | 21.01         | 21.66         | 22.20         | 1.00           | 22.14         | 19.86            | 21.47         | 23.05            | 19.70         |  |
| 8074     | 25.15                 | 21.08         | 22.74            | 20.57         | 21.15         | 22.09         | 21.59         | 1.00           | 23.12         | 19.84            | 22.71         | 23.66            | 19.24         |  |
| 376      | 23.72                 | 22.09         | 22.11            | 20.21         | 21.86         | 23.43         | 22.46         | 1.00           | 22.34         | 19.42            | 21.54         | 23.00            | 18.72         |  |
| 2193     | 25.64                 | 22.29         | 25.35            | 22.53         | 23.10         | 23.76         | 23.98         | 1.00           | 24.39         | 15.24            | 24.49         | 25.69            | 20.45         |  |
| 2242     | 21.53                 | 22.81         | 24.92            | 22.25         | 23.64         | 22.61         | 23.26         | 1.00           | 24.06         | 21.27            | 24.11         | 24.57            | 20.02         |  |
| 3055     | 23.95                 | 21.15         | 22.99            | 21.31         | 22.09         | 22.54         | 22.40         | 1.00           | 22.92         | 20.73            | 22.96         | 23.77            | 19.59         |  |
| 3077     | 26.51                 | 22.37         | 24.45            | 21.59         | 22.46         | 22.99         | 23.07         | 1.00           | 23.61         | 21.03            | 23.85         | 24.54            | 20.04         |  |
| 4021     | 19.83                 | 20.75         | 23.03            | 20.63         | 20.87         | 21.57         | 20.70         | 1.00           | 22.38         | 20.20            | 22.53         | 22.95            | 19.42         |  |
| 4085     | 20.18                 | 19.26         | 23.39            | 20.96         | 19.81         | 19.37         | 20.58         | 1.00           | 21.04         | 19.84            | 22.36         | 22.30            | 19.94         |  |
| 4193     | 24.10                 | 20.60         | 21.50            | 20.55         | 20.08         | 22.03         | 22.55         | 1.00           | 23.74         | 20.87            | 22.64         | 24.04            | 20.03         |  |
| 5031     | 22.71                 | 24.11         | 18.48            | 19.31         | 18.62         | 20.48         | 18.22         | 1.00           | 21.86         | 18.92            | 19.63         | 22.32            | 18.27         |  |
| 5106     | 22.21                 | 21.62         | 22.89            | 20.22         | 20.08         | 21.48         | 20.01         | 1.00           | 21.05         | 19.31            | 22.44         | 22.05            | 18.73         |  |
| 5123     | 22.26                 | 18.17         | 20.86            | 21.07         | 22.51         | 22.70         | 22.78         | 1.00           | 22.56         | 20.13            | 21.80         | 23.38            | 19.73         |  |
| 6001     | 17.25                 | 17.70         | 20.76            | 18.75         | 17.47         | 18.53         | 18.23         | 2.19           | 19.22         | 17.18            | 19.73         | 19.93            | 17.94         |  |
| 6017     | 21.69                 | 21.76         | 23.59            | 20.92         | 20.98         | 21.54         | 21.01         | 1.00           | 23.28         | 20.50            | 23.34         | 24.19            | 19.34         |  |
| 6095     | 20.79                 | 21.09         | 23.55            | 21.50         | 22.07         | 22.16         | 22.48         | 1.00           | 22.61         | 21.23            | 22.73         | 24.57            | 20.21         |  |
| 6101     | 23.14                 | 19.99         | 23.04            | 21.12         | 21.89         | 21.83         | 22.16         | 1.00           | 21.98         | 19.89            | 22.01         | 22.63            | 19.69         |  |
| 7031     | 22.89                 | 20.42         | 24.09            | 22.28         | 23.16         | 22.72         | 22.90         | 1.00           | 23.21         | 21.04            | 23.62         | 24.36            | 19.67         |  |
| 7042     | 22.16                 | 19.90         | 23.75            | 22.00         | 22.35         | 20.92         | 22.20         | 1.00           | 22.56         | 21.22            | 23.79         | 24.23            | 19.59         |  |
| 7089     | 22.35                 | 19.37         | 23.04            | 21.25         | 22.59         | 22.16         | 22.33         | 1.00           | 22.96         | 20.24            | 22.46         | 23.72            | 19.28         |  |
| 8017     | 21.54                 | 19.83         | 21.38            | 21.47         | 22.92         | 22.56         | 22.09         | 1.00           | 22.65         | 19.99            | 22.54         | 23.24            | 19.01         |  |
| 8053     | 22.31                 | 21.24         | 22.91            | 21.19         | 21.86         | 22.98         | 22.60         | 3.78           | 22.72         | 19.97            | 22.83         | 23.62            | 19.67         |  |
| 8066     | 19.17                 | 20.19         | 21.71            | 19.80         | 21.29         | 20.25         | 21.13         | 1.00           | 21.61         | 18.91            | 21.44         | 22.08            | 19.42         |  |

Supplemental Table 2

| SampleID | MIR-330-3p 41-CT | MIR-15a 41-CT | MIR-501 41-CT | MIR-98 41-CT | MIR-346 41-CT | MIR-152 41-CT | MIR-181c 41-CT | MIR-184 41-CT | MIR-211ACT | MIR-204ACT | MIR-139-5pACT | MIR-328ACT | MIR-132ACT | MIR-126ACT | MIR-138ACT |
|----------|------------------|---------------|---------------|--------------|---------------|---------------|----------------|---------------|------------|------------|---------------|------------|------------|------------|------------|
| 406      | 16.28            | 16.96         | 15.06         | 17.39        | 18.50         | 15.26         | 13.26          | 15.21         | -0.38      | -0.60      | 4.19          | 1.81       | 2.19       | -0.72      | 2.00       |
| 2257     | 15.98            | 17.68         | 14.75         | 13.68        | 15.61         | 14.06         | 14.06          | 13.60         | 0.16       | -0.70      | 4.64          | 1.26       | 0.85       | -0.23      | 0.79       |
| 3010     | 15.60            | 16.76         | 15.08         | 14.29        | 1.00          | 13.17         | 12.27          | 13.23         | 7.90       | -0.05      | 5.46          | 0.69       | 1.66       | -0.85      | 1.21       |
| 3027     | 18.18            | 20.22         | 16.65         | 19.03        | 18.60         | 16.92         | 16.31          | 16.01         | -3.44      | -2.86      | 1.74          | 1.02       | 0.64       | -2.30      | -0.41      |
| 3076     | 17.51            | 17.41         | 17.30         | 18.35        | 17.69         | 14.41         | 14.06          | 15.39         | 0.70       | -0.13      | 4.48          | 2.20       | 1.94       | 0.91       | 2.34       |
| 3171     | 16.87            | 17.90         | 14.71         | 16.23        | 16.64         | 14.70         | 14.24          | 15.21         | 8.04       | -0.05      | 3.65          | 1.32       | 1.75       | -0.80      | 7.37       |
| 4059     | 15.00            | 14.63         | 15.57         | 12.03        | 13.91         | 12.80         | 11.64          | 13.80         | -1.51      | 0.00       | 4.36          | 1.22       | 3.46       | 1.40       | 2.57       |
| 5033     | 15.15            | 15.00         | 12.78         | 14.40        | 16.83         | 12.47         | 12.10          | 13.16         | 2.77       | 1.47       | 5.46          | 0.82       | 3.76       | 2.31       | 2.52       |
| 5126     | 17.13            | 17.78         | 22.02         | 17.58        | 17.89         | 16.05         | 14.44          | 15.60         | 0.13       | -0.53      | 4.21          | 1.29       | 2.48       | -0.78      | 1.44       |
| 5144     | 16.31            | 16.03         | 14.12         | 17.90        | 18.28         | 15.17         | 12.84          | 14.87         | -1.70      | 1.41       | -0.66         | 1.08       | 1.66       | -0.50      | 1.20       |
| 5275     | 12.30            | 11.99         | 11.14         | 1.00         | 13.27         | 10.66         | 10.00          | 11.02         | 2.87       | 2.68       | 8.82          | -1.39      | 0.51       | 0.44       | 0.74       |
| 6039     | 17.03            | 16.52         | 17.11         | 16.83        | 16.84         | 14.22         | 14.37          | 15.32         | -0.11      | -1.27      | 3.22          | 1.33       | 2.61       | 1.30       | 2.50       |
| 6085     | 16.59            | 15.92         | 14.66         | 15.12        | 17.28         | 15.30         | 14.70          | 14.35         | -3.42      | -2.43      | 1.06          | 1.61       | 1.50       | -1.26      | 1.20       |
| 7025     | 17.51            | 18.11         | 16.57         | 16.82        | 17.97         | 13.88         | 13.66          | 14.60         | -1.68      | -2.05      | 2.76          | 1.92       | 2.11       | 0.07       | 1.99       |
| 7029     | 17.15            | 18.55         | 16.03         | 17.60        | 17.55         | 15.07         | 14.35          | 15.49         | -1.86      | -2.23      | 2.11          | 1.22       | 2.32       | 0.06       | 2.16       |
| 7040     | 17.11            | 16.20         | 16.39         | 17.11        | 16.68         | 13.91         | 14.27          | 15.17         | -1.66      | -1.37      | 2.76          | 2.17       | 2.60       | 0.64       | 2.06       |
| 7047     | 16.59            | 17.51         | 14.07         | 18.56        | 17.91         | 14.89         | 13.87          | 15.10         | -0.74      | -2.34      | 3.19          | 1.96       | 1.79       | 0.06       | 2.13       |
| 7076     | 15.88            | 13.83         | 11.81         | 13.78        | 15.69         | 14.27         | 13.58          | 14.12         | -0.77      | -1.90      | 2.43          | 1.60       | 2.30       | 0.41       | 1.86       |
| 8018     | 16.63            | 16.64         | 14.01         | 16.24        | 14.03         | 15.01         | 13.31          | 14.54         | -0.77      | -2.27      | 2.96          | 2.28       | 1.58       | -1.30      | 0.97       |
| 8046     | 13.64            | 13.91         | 4.79          | 10.62        | 11.61         | 11.29         | 11.83          | 10.03         | 5.06       | 3.06       | 2.80          | 0.13       | 4.58       | 3.46       | 3.01       |
| 8074     | 15.88            | 17.42         | 12.90         | 14.18        | 13.41         | 13.40         | 13.07          | 13.17         | -1.96      | -2.92      | 2.87          | 1.51       | 2.50       | -0.71      | 1.82       |
| 376      | 16.48            | 18.16         | 15.66         | 17.09        | 17.08         | 14.09         | 12.79          | 13.98         | -2.36      | -1.68      | 2.86          | 2.30       | 1.53       | 0.35       | 1.81       |
| 2193     | 17.15            | 18.86         | 15.87         | 17.55        | 17.14         | 15.55         | 14.91          | 16.09         | 1.02       | 0.74       | 4.89          | 2.06       | 2.89       | 0.04       | 3.42       |
| 2242     | 17.84            | 17.52         | 17.37         | 16.86        | 18.74         | 15.65         | 14.52          | 16.44         | -0.56      | 0.45       | 1.64          | 2.35       | 2.47       | 2.74       | 3.49       |
| 3055     | 15.00            | 16.94         | 10.20         | 12.42        | 13.96         | 13.85         | 11.84          | 11.55         | -3.16      | -0.92      | 2.78          | 0.76       | 1.18       | -1.08      | 1.69       |
| 3077     | 18.38            | 19.96         | 17.35         | 19.45        | 16.27         | 16.60         | 15.82          | 15.24         | -3.48      | -3.96      | 2.23          | 2.86       | 1.03       | -2.75      | 0.01       |
| 4021     | 16.96            | 19.17         | 14.99         | 18.27        | 17.00         | 14.23         | 14.69          | 15.26         | -1.31      | -1.17      | 3.19          | 2.14       | 2.35       | 0.68       | 2.92       |
| 4085     | 15.62            | 16.93         | 14.71         | 8.93         | 17.31         | 11.23         | 11.73          | 14.33         | -0.18      | 0.35       | 4.43          | 2.29       | 3.56       | 3.32       | 3.45       |
| 4193     | 15.04            | 18.17         | 13.45         | 15.41        | 15.32         | 13.57         | 13.00          | 13.48         | -1.41      | -2.25      | 3.77          | 2.04       | 1.56       | -0.66      | 1.66       |
| 5031     | 15.74            | 16.69         | 16.44         | 17.37        | 17.71         | 13.94         | 13.84          | 14.39         | 1.05       | 0.01       | 4.78          | 0.13       | 1.20       | 0.15       | 2.78       |
| 5106     | 16.37            | 11.79         | 14.81         | 14.70        | 18.03         | 13.16         | 12.77          | 13.87         | -1.74      | -0.27      | 3.74          | 1.47       | 2.95       | 2.78       | 3.27       |
| 5123     | 15.69            | 16.82         | 13.63         | 17.04        | 16.40         | 14.67         | 12.67          | 14.53         | 0.47       | 1.00       | 5.49          | 0.66       | 2.51       | 1.26       | 2.83       |
| 6001     | 17.39            | 17.72         | 16.49         | 19.32        | 17.98         | 15.22         | 14.53          | 15.76         | -2.83      | -2.48      | 2.28          | 1.43       | 2.45       | -0.48      | 2.37       |
| 6017     | 14.10            | 16.11         | 14.04         | 15.56        | 14.28         | 12.73         | 12.40          | 13.83         | 5.49       | -1.93      | 2.91          | 1.89       | 2.06       | 0.09       | 2.64       |
| 6095     | 17.17            | 18.34         | 16.44         | 18.43        | 17.65         | 15.13         | 14.14          | 15.24         | -3.95      | -1.16      | 3.74          | 2.17       | 1.65       | 0.28       | 2.52       |
| 6101     | 16.84            | 17.55         | 16.52         | 18.06        | 17.19         | 13.48         | 14.06          | 15.73         | -0.75      | -1.11      | 3.03          | 1.90       | 2.77       | 0.70       | 2.78       |
| 7031     | 13.69            | 12.51         | 13.06         | 1.00         | 16.09         | 11.82         | 11.88          | 11.54         | -2.41      | 1.96       | 3.54          | 0.85       | 4.44       | 4.10       | 4.61       |
| 7042     | 17.52            | 19.69         | 15.56         | 17.23        | 18.01         | 14.18         | 13.52          | 14.21         | -1.02      | -2.12      | 3.19          | 1.96       | 1.84       | 0.40       | 2.78       |
| 7089     | 16.48            | 20.03         | 14.06         | 16.56        | 16.87         | 13.82         | 13.21          | 13.04         | -1.40      | -1.88      | 3.79          | 1.38       | 1.77       | -0.39      | 2.09       |
| 8017     | 16.65            | 19.23         | 13.85         | 17.36        | 17.10         | 15.19         | 14.75          | 14.82         | -0.96      | -1.66      | 3.79          | 1.41       | 0.85       | -0.14      | 2.33       |
| 8053     | 16.13            | 18.73         | 15.08         | 16.19        | 16.83         | 14.91         | 11.93          | 14.01         | -3.45      | -0.69      | 3.45          | 2.15       | 1.98       | -0.48      | 2.37       |
| 8066     | 15.08            | 16.45         | 14.74         | 16.58        | 15.41         | 14.53         | 13.78          | 12.92         | 13.73      | 0.01       | 4.94          | 0.38       | 0.54       | -0.54      | 1.83       |
| 406      | 16.48            | 14.22         | 11.74         | 15.06        | 18.12         | 14.08         | 11.99          | 11.80         | -1.86      | 0.58       | -0.86         | 1.09       | 1.41       | -0.04      | -0.31      |
| 2257     | 15.70            | 13.33         | 13.52         | 16.82        | 16.51         | 13.84         | 13.24          | 13.02         | 1.09       | 0.38       | -2.12         | -0.92      | -0.22      | -2.22      | -1.88      |
| 3010     | 16.85            | 17.53         | 13.91         | 12.31        | 16.82         | 13.98         | 14.13          | 17.21         | 3.12       | 2.96       | 0.12          | 0.36       | 0.63       | 0.61       | 0.95       |
| 3027     | 16.04            | 15.49         | 13.79         | 13.84        | 18.05         | 14.69         | 14.25          | 13.13         | -3.22      | -0.27      | -1.03         | 0.38       | -0.07      | -1.41      | -0.09      |
| 3076     | 15.96            | 13.59         | 12.01         | 16.69        | 16.05         | 14.75         | 12.76          | 16.64         | 0.48       | -0.63      | -1.96         | 2.09       | 0.80       | -0.54      | -0.06      |
| 3171     | 15.72            | 17.62         | 9.91          | 13.51        | 14.86         | 14.89         | 12.95          | 12.37         | 2.45       | 1.54       | -0.04         | 0.60       | 1.20       | -0.52      | 0.75       |
| 4059     | 13.97            | 13.96         | 3.02          | 11.02        | 17.27         | 10.72         | 10.56          | 9.83          | -1.64      | 1.91       | -0.71         | 0.82       | 1.97       | 1.14       | 1.32       |
| 5033     | 16.56            | 15.88         | 15.34         | 12.98        | 17.97         | 13.32         | 13.09          | 13.40         | 3.46       | 2.53       | -0.83         | 0.70       | 1.42       | 3.07       | 1.90       |
| 5126     | 15.92            | 13.63         | 11.78         | 12.24        | 17.31         | 13.69         | 11.50          | 14.71         | 1.08       | 0.45       | -0.97         | 2.14       | 2.45       | 1.67       | 1.48       |
| 5144     | 14.35            | 16.03         | 15.98         | 13.81        | 16.55         | 12.16         | 10.96          | 12.04         | -2.98      | -1.63      | 2.79          | 0.79       | 1.22       | -0.42      | 1.04       |
| 5275     | 12.10            | 9.75          | 10.66         | 1.00         | 13.66         | 12.35         | 9.92           | 9.37          | 14.58      | 9.15       | 5.68          | -3.40      | -2.29      | -2.40      | -2.31      |
| 6039     | 16.59            | 17.73         | 12.77         | 15.47        | 17.49         | 14.66         | 13.37          | 17.75         | -1.99      | 0.28       | -2.21         | 1.44       | 0.59       | 0.37       | -0.33      |
| 6085     | 16.75            | 14.63         | 14.50         | 12.33        | 14.92         | 13.89         | 14.26          | 13.15         | -3.11      | -0.08      | -1.59         | 1.10       | 0.43       | -0.27      | 1.69       |

Supplemental Table 2

| SampleID | MIR-330-3p_41-CT | MIR-15a_41-CT | MIR-501_41-CT | MIR-98_41-CT | MIR-346_41-CT | MIR-152_41-CT | MIR-181c_41-CT | MIR-184_41-CT | MIR-211ACT | MIR-204ACT | MIR-139-5pΔCT | MIR-328ACT | MIR-132ACT | MIR-126ACT | MIR-138ACT |
|----------|------------------|---------------|---------------|--------------|---------------|---------------|----------------|---------------|------------|------------|---------------|------------|------------|------------|------------|
| 7025     | 17.14            | 12.33         | 13.90         | 17.35        | 16.77         | 15.03         | 14.49          | 18.45         | -1.46      | 1.12       | -1.35         | 0.31       | -0.05      | -0.19      | -0.15      |
| 7029     | 14.85            | 13.19         | 14.26         | 13.25        | 17.24         | 14.79         | 11.50          | 13.11         | -0.44      | 0.75       | -1.57         | 1.97       | 2.59       | 0.32       | 1.24       |
| 7040     | 16.34            | 14.70         | 9.22          | 13.03        | 16.38         | 13.09         | 13.24          | 15.49         | -2.60      | 0.70       | -2.30         | 1.15       | 0.88       | 0.45       | 0.33       |
| 7047     | 16.66            | 9.39          | 10.94         | 16.65        | 17.98         | 14.54         | 13.23          | 14.74         | -3.54      | 0.17       | -0.93         | 0.79       | 0.50       | 0.12       | 0.45       |
| 7076     | 16.71            | 15.76         | 13.70         | 10.19        | 17.15         | 13.61         | 12.89          | 14.08         | 1.62       | 0.39       | -0.92         | 1.56       | 1.61       | 0.63       | 0.59       |
| 8018     | 15.04            | 16.30         | 12.84         | 10.07        | 15.75         | 13.21         | 11.91          | 13.58         | -1.31      | 1.86       | -1.21         | 1.43       | 0.24       | -0.61      | 0.06       |
| 8046     | 15.52            | 14.87         | 11.27         | 14.05        | 17.07         | 13.82         | 11.50          | 18.18         | 2.83       | 3.88       | 1.65          | 0.25       | -0.08      | -0.72      | -1.27      |
| 8074     | 16.90            | 11.50         | 12.60         | 14.95        | 18.07         | 14.82         | 13.93          | 13.61         | -3.68      | 0.39       | -1.28         | 0.90       | 0.32       | -0.62      | -0.12      |
| 376      | 16.12            | 16.53         | 13.21         | 16.50        | 16.52         | 16.19         | 13.97          | 19.04         | -3.53      | -1.89      | -1.92         | -0.01      | -1.66      | -3.23      | -2.27      |
| 2193     | 17.91            | 14.12         | 16.56         | 17.86        | 18.87         | 16.26         | 14.79          | 19.55         | -1.65      | 1.70       | -1.36         | 1.46       | 0.89       | 0.23       | 0.02       |
| 2242     | 17.68            | 15.09         | 15.85         | 17.34        | 17.40         | 14.93         | 14.65          | 20.74         | 2.22       | 0.94       | -1.18         | 1.50       | 0.10       | 1.14       | 0.49       |
| 3055     | 16.61            | 14.93         | 10.72         | 13.29        | 17.98         | 13.92         | 12.84          | 16.95         | -1.71      | 1.10       | -0.74         | 0.94       | 0.16       | -0.30      | -0.15      |
| 3077     | 17.05            | 14.51         | 14.87         | 17.19        | 19.19         | 15.22         | 13.57          | 19.90         | -3.10      | 1.04       | -1.04         | 1.82       | 0.96       | 0.42       | 0.34       |
| 4021     | 15.89            | 10.56         | 15.79         | 11.13        | 16.98         | 13.33         | 12.93          | 14.49         | 2.50       | 1.58       | -0.70         | 1.70       | 1.46       | 0.76       | 1.63       |
| 4085     | 14.86            | 10.35         | 3.32          | 1.00         | 13.60         | 11.02         | 10.49          | 12.77         | 2.36       | 3.28       | -0.86         | 1.58       | 2.73       | 3.16       | 1.95       |
| 4193     | 16.72            | 15.00         | 12.94         | 15.52        | 18.75         | 15.13         | 13.08          | 15.78         | -2.06      | 1.44       | 0.54          | 1.49       | 1.97       | 0.01       | -0.51      |
| 5031     | 14.66            | 12.31         | 7.12          | 11.45        | 14.49         | 14.75         | 11.84          | 11.85         | -1.86      | -3.26      | 2.37          | 1.55       | 2.24       | 0.38       | 2.63       |
| 5106     | 14.86            | 12.31         | 12.88         | 13.08        | 14.77         | 13.92         | 10.73          | 12.95         | -0.41      | 0.17       | -1.10         | 1.58       | 1.72       | 0.32       | 1.79       |
| 5123     | 16.44            | 16.01         | 9.07          | 14.37        | 17.57         | 15.43         | 12.42          | 18.89         | -0.77      | 3.33       | 0.64          | 0.43       | -1.02      | -1.20      | -1.28      |
| 6001     | 13.81            | 8.35          | 11.86         | 10.40        | 14.05         | 10.10         | 9.42           | 8.84          | 1.92       | 1.47       | -1.59         | 0.42       | 1.70       | 0.64       | 0.93       |
| 6017     | 16.87            | 10.22         | 14.82         | 14.02        | 16.55         | 14.58         | 13.62          | 14.79         | 1.14       | 1.07       | -0.76         | 1.91       | 1.85       | 1.29       | 1.83       |
| 6095     | 16.96            | 11.96         | 13.62         | 14.70        | 17.22         | 13.95         | 11.68          | 17.40         | 2.03       | 1.73       | -0.72         | 1.32       | 0.75       | 0.67       | 0.35       |
| 6101     | 15.18            | 10.57         | 10.48         | 15.00        | 16.46         | 14.04         | 12.70          | 18.74         | -0.85      | 2.30       | -0.74         | 1.18       | 0.40       | 0.46       | 0.13       |
| 7031     | 16.94            | 16.67         | 15.67         | 13.52        | 18.21         | 13.60         | 13.71          | 14.33         | 0.60       | 3.07       | -0.60         | 1.21       | 0.33       | 0.77       | 0.59       |
| 7042     | 17.00            | 9.97          | 11.12         | 15.58        | 16.57         | 12.14         | 11.92          | 12.64         | 0.26       | 2.52       | -1.33         | 0.42       | 0.07       | 1.50       | 0.21       |
| 7089     | 15.00            | 13.80         | 10.99         | 13.32        | 17.61         | 13.99         | 12.53          | 16.71         | -0.83      | 2.15       | -1.51         | 0.28       | -1.07      | -0.64      | -0.80      |
| 8017     | 16.00            | 13.62         | 10.15         | 10.94        | 17.94         | 15.53         | 13.31          | 13.53         | 0.13       | 1.84       | 0.29          | 0.20       | -1.25      | -0.89      | -0.42      |
| 8053     | 16.40            | 11.47         | 11.40         | 14.74        | 16.37         | 14.99         | 12.36          | 13.74         | -0.64      | 0.43       | -1.24         | 0.48       | -0.19      | -1.30      | -0.93      |
| 8066     | 14.96            | 10.13         | 11.91         | 14.38        | 15.88         | 13.67         | 11.60          | 18.99         | 1.85       | 0.83       | -0.69         | 1.22       | -0.27      | 0.77       | -0.11      |

Supplemental Table 2

| ΔCT = (Raw CT miRNA) - (Raw CT mean endogenous controls) |             |            |               |            |               |            |               |            |            |           |            |            |             |            |
|----------------------------------------------------------|-------------|------------|---------------|------------|---------------|------------|---------------|------------|------------|-----------|------------|------------|-------------|------------|
| SampleID                                                 | MIR-208bΔCT | MIR-191ΔCT | MIR-331-3pΔCT | MIR-149ΔCT | MIR-342-3pΔCT | MIR-370ΔCT | MIR-330-3pΔCT | MIR-15aΔCT | MIR-501ΔCT | MIR-98ΔCT | MIR-346ΔCT | MIR-152ΔCT | MIR-181cΔCT | MIR-184ΔCT |
| 406                                                      | 21.11       | -1.94      | 1.03          | -0.33      | -3.26         | 3.78       | 5.83          | 5.15       | 7.05       | 4.72      | 3.61       | 6.85       | 8.85        | 6.90       |
| 2257                                                     | 20.95       | -1.35      | 1.23          | -0.70      | -3.08         | 3.93       | 5.97          | 4.27       | 7.20       | 8.26      | 6.34       | 7.88       | 7.89        | 8.35       |
| 3010                                                     | 19.73       | -1.65      | 0.18          | -0.96      | -3.31         | 3.17       | 5.12          | 3.97       | 5.65       | 6.44      | 19.73      | 7.55       | 8.46        | 7.50       |
| 3027                                                     | 20.91       | -2.57      | 0.26          | -1.23      | -4.44         | 4.00       | 3.73          | 1.69       | 5.27       | 2.89      | 3.31       | 4.99       | 5.61        | 5.91       |
| 3076                                                     | 22.71       | 0.14       | 1.94          | -0.02      | -1.93         | 4.55       | 6.20          | 6.30       | 6.40       | 5.36      | 6.02       | 9.29       | 9.65        | 8.32       |
| 3171                                                     | 20.99       | -1.23      | 0.71          | -0.50      | -3.06         | 4.42       | 5.11          | 4.09       | 7.27       | 5.76      | 5.34       | 7.28       | 7.75        | 6.78       |
| 4059                                                     | 20.50       | -0.17      | 1.48          | -0.38      | -1.55         | 3.64       | 6.50          | 6.87       | 5.93       | 9.47      | 7.59       | 8.70       | 9.86        | 7.69       |
| 5033                                                     | 14.16       | 0.05       | 1.05          | -0.94      | -1.40         | 3.32       | 6.63          | 6.78       | 8.99       | 7.37      | 4.94       | 9.31       | 9.67        | 8.61       |
| 5126                                                     | 22.30       | -1.37      | 0.90          | 0.18       | -3.70         | 4.60       | 6.17          | 5.52       | 1.28       | 5.72      | 5.41       | 7.25       | 8.86        | 7.70       |
| 5144                                                     | 22.04       | 0.02       | 2.14          | -0.54      | -2.23         | 3.68       | 6.73          | 7.01       | 8.92       | 5.14      | 4.76       | 7.87       | 10.20       | 8.16       |
| 5275                                                     | 18.05       | -1.80      | -1.13         | 3.06       | -1.32         | 2.86       | 6.75          | 7.06       | 7.90       | 18.05     | 5.77       | 8.39       | 9.04        | 8.03       |
| 6039                                                     | 14.98       | 0.23       | 1.86          | -0.43      | -2.20         | 4.61       | 5.79          | 6.30       | 5.71       | 5.99      | 5.98       | 8.60       | 8.44        | 7.50       |
| 6085                                                     | 21.04       | -1.69      | 1.15          | -0.43      | -3.02         | 3.70       | 5.45          | 6.12       | 7.38       | 6.92      | 4.76       | 6.74       | 7.34        | 7.69       |
| 7025                                                     | 14.61       | -1.32      | 1.18          | -0.37      | -3.10         | 4.86       | 5.99          | 5.39       | 6.92       | 6.67      | 5.53       | 9.61       | 9.84        | 8.89       |
| 7029                                                     | 22.24       | -0.46      | 1.46          | -0.27      | -2.33         | 4.94       | 6.09          | 4.69       | 7.21       | 5.64      | 5.69       | 8.17       | 8.89        | 7.75       |
| 7040                                                     | 21.62       | -0.40      | 1.83          | 0.09       | -2.52         | 4.93       | 5.51          | 6.42       | 6.23       | 5.51      | 5.94       | 8.71       | 8.35        | 7.45       |
| 7047                                                     | 21.51       | -1.07      | 1.16          | -0.99      | -3.00         | 4.05       | 5.93          | 5.00       | 8.45       | 3.95      | 4.61       | 7.62       | 8.64        | 7.42       |
| 7076                                                     | 20.16       | -0.69      | 1.55          | -1.01      | -2.60         | 3.63       | 5.28          | 7.32       | 9.35       | 7.37      | 5.47       | 6.89       | 7.58        | 7.04       |
| 8018                                                     | 20.68       | -2.05      | 0.57          | -0.01      | -4.23         | 3.88       | 5.05          | 5.04       | 7.68       | 5.44      | 7.66       | 6.68       | 8.37        | 7.15       |
| 8046                                                     | 17.70       | -0.39      | 2.38          | 0.57       | -0.84         | 0.34       | 5.06          | 4.79       | 13.92      | 8.08      | 7.10       | 7.41       | 6.87        | 8.67       |
| 8074                                                     | 20.20       | -1.38      | 0.95          | -0.61      | -3.24         | 3.41       | 5.31          | 3.78       | 8.30       | 7.02      | 7.78       | 7.79       | 8.13        | 8.03       |
| 376                                                      | 21.12       | -0.72      | 1.43          | -0.58      | -2.64         | 3.63       | 5.64          | 3.96       | 6.46       | 5.03      | 5.04       | 8.03       | 9.33        | 8.14       |
| 2193                                                     | 23.04       | 0.47       | 1.85          | -0.09      | -1.47         | 4.93       | 6.89          | 5.18       | 8.18       | 6.50      | 6.90       | 8.49       | 9.13        | 7.96       |
| 2242                                                     | 23.22       | -0.14      | 2.64          | -0.22      | -1.60         | 4.67       | 6.38          | 6.70       | 6.85       | 7.36      | 5.49       | 8.58       | 9.70        | 7.78       |
| 3055                                                     | 19.31       | -1.12      | 0.52          | -0.36      | -2.18         | 2.09       | 5.31          | 3.38       | 10.11      | 7.89      | 6.35       | 6.46       | 8.48        | 8.76       |
| 3077                                                     | 21.52       | -2.06      | 0.13          | -1.11      | -4.72         | 4.87       | 4.14          | 2.56       | 5.18       | 3.08      | 6.26       | 5.92       | 6.70        | 7.28       |
| 4021                                                     | 22.43       | -0.47      | 1.06          | 0.01       | -1.89         | 4.53       | 6.47          | 4.27       | 8.45       | 5.16      | 6.43       | 9.21       | 8.74        | 8.17       |
| 4085                                                     | 22.22       | 0.29       | 1.86          | 1.54       | -1.64         | 4.62       | 7.60          | 6.29       | 8.51       | 14.29     | 5.92       | 12.00      | 11.49       | 8.90       |
| 4193                                                     | 20.44       | -1.36      | 0.71          | -0.09      | -3.02         | 3.57       | 6.40          | 3.27       | 7.99       | 6.04      | 6.13       | 7.87       | 8.44        | 7.96       |
| 5031                                                     | 10.14       | -1.04      | 1.00          | -0.65      | -2.72         | 3.41       | 6.38          | 5.43       | 5.68       | 4.75      | 4.41       | 8.18       | 8.28        | 7.73       |
| 5106                                                     | 21.62       | 0.95       | 1.44          | -0.39      | -1.38         | 4.03       | 6.25          | 10.83      | 7.81       | 7.93      | 4.60       | 9.46       | 9.85        | 8.75       |
| 5123                                                     | 21.19       | -0.50      | 1.07          | 0.34       | -1.72         | 3.72       | 6.50          | 5.38       | 8.57       | 5.15      | 5.80       | 7.52       | 9.52        | 7.66       |
| 6001                                                     | 22.34       | -0.90      | 0.69          | -0.31      | -2.97         | 4.51       | 5.95          | 5.62       | 6.85       | 4.02      | 5.36       | 8.12       | 8.81        | 7.58       |
| 6017                                                     | 19.96       | -0.48      | 1.67          | -0.39      | -2.50         | 3.71       | 6.85          | 4.85       | 6.92       | 5.40      | 6.68       | 8.23       | 8.56        | 7.13       |
| 6095                                                     | 22.51       | -0.77      | 1.24          | -0.38      | -2.45         | 4.10       | 6.35          | 4.77       | 7.07       | 5.08      | 5.86       | 8.38       | 9.38        | 8.27       |
| 6101                                                     | 11.08       | 0.13       | 1.47          | -0.16      | -2.06         | 4.55       | 6.01          | 5.31       | 6.34       | 4.80      | 5.67       | 9.38       | 8.80        | 7.12       |
| 7031                                                     | 19.72       | 1.18       | 2.84          | 0.74       | 0.64          | 2.76       | 7.03          | 8.21       | 7.66       | 19.72     | 4.63       | 8.90       | 8.84        | 9.18       |
| 7042                                                     | 21.99       | -0.86      | 1.17          | -0.54      | -2.95         | 4.16       | 5.47          | 3.30       | 7.43       | 5.76      | 4.98       | 8.81       | 9.46        | 8.78       |
| 7089                                                     | 20.86       | -1.09      | 0.74          | -0.41      | -3.23         | 3.04       | 5.38          | 1.83       | 7.80       | 5.30      | 4.99       | 8.04       | 8.66        | 8.83       |
| 8017                                                     | 21.63       | -1.35      | 0.67          | -0.61      | -3.02         | 2.98       | 5.98          | 3.39       | 8.77       | 5.27      | 5.53       | 7.44       | 7.87        | 7.81       |
| 8053                                                     | 21.08       | -1.72      | 1.30          | -0.14      | -2.92         | 8.17       | 5.95          | 3.35       | 7.00       | 5.89      | 5.25       | 7.17       | 10.15       | 8.07       |
| 8066                                                     | 19.92       | -1.42      | 0.49          | -0.46      | -3.15         | 2.33       | 5.84          | 4.47       | 6.18       | 4.34      | 5.51       | 6.39       | 7.14        | 8.00       |
| 406                                                      | 20.76       | -0.55      | 1.93          | -0.46      | -1.33         | 1.88       | 5.28          | 7.54       | 10.02      | 6.70      | 3.64       | 7.68       | 9.77        | 9.96       |
| 2257                                                     | 18.96       | -2.19      | 0.52          | -2.01      | -3.25         | 0.72       | 4.27          | 6.63       | 6.44       | 3.14      | 3.45       | 6.13       | 6.72        | 6.94       |
| 3010                                                     | 20.78       | 0.14       | 1.35          | 0.24       | -1.09         | 3.05       | 5.73          | 5.05       | 8.66       | 10.27     | 5.75       | 8.60       | 8.44        | 5.36       |
| 3027                                                     | 19.42       | -2.58      | 0.80          | -2.04      | -3.01         | 1.69       | 4.38          | 4.93       | 6.63       | 6.58      | 2.37       | 5.73       | 6.16        | 7.29       |
| 3076                                                     | 20.48       | -1.33      | 1.63          | -0.91      | -1.70         | 2.15       | 5.52          | 7.88       | 9.46       | 4.79      | 5.42       | 6.73       | 8.72        | 4.83       |
| 3171                                                     | 20.09       | -1.13      | 1.70          | -0.55      | -1.88         | 2.69       | 5.37          | 3.48       | 11.18      | 7.58      | 6.23       | 6.20       | 8.15        | 8.72       |
| 4059                                                     | 19.25       | 0.06       | 1.47          | -0.86      | -1.15         | 1.94       | 6.28          | 6.29       | 17.23      | 9.24      | 2.98       | 9.53       | 9.69        | 10.43      |
| 5033                                                     | 22.19       | 1.49       | 10.25         | -1.05      | -0.32         | 3.66       | 6.63          | 7.31       | 7.85       | 10.21     | 5.22       | 9.87       | 10.10       | 9.79       |
| 5126                                                     | 20.89       | 0.61       | 2.64          | -0.51      | -0.34         | 2.83       | 5.98          | 8.26       | 10.11      | 9.65      | 4.58       | 8.20       | 10.40       | 7.19       |
| 5144                                                     | 19.99       | -0.06      | 1.66          | -0.70      | -2.65         | 2.65       | 6.64          | 4.96       | 5.01       | 7.18      | 4.44       | 8.83       | 10.03       | 8.95       |
| 5275                                                     | 16.13       | -3.40      | -2.86         | 1.00       | -2.92         | 1.42       | 5.03          | 7.39       | 6.48       | 16.13     | 3.47       | 4.78       | 7.21        | 7.77       |
| 6039                                                     | 20.98       | -0.90      | 1.73          | -0.96      | -1.75         | 2.53       | 5.39          | 4.26       | 9.21       | 6.51      | 4.50       | 7.33       | 8.61        | 4.24       |
| 6085                                                     | 20.57       | -1.46      | 1.57          | -1.23      | -2.74         | 2.37       | 4.81          | 6.94       | 7.07       | 9.23      | 6.65       | 7.67       | 7.30        | 8.42       |

Supplemental Table 2

| $\Delta\text{CT} = (\text{Raw CT miRNA}) - (\text{Raw CT mean endogenous controls})$ |                            |                           |                              |                           |                              |                           |                              |                           |                           |                          |                           |                           |                            |                           |
|--------------------------------------------------------------------------------------|----------------------------|---------------------------|------------------------------|---------------------------|------------------------------|---------------------------|------------------------------|---------------------------|---------------------------|--------------------------|---------------------------|---------------------------|----------------------------|---------------------------|
| SampleID                                                                             | MIR-208b $\Delta\text{CT}$ | MIR-191 $\Delta\text{CT}$ | MIR-331-3p $\Delta\text{CT}$ | MIR-149 $\Delta\text{CT}$ | MIR-342-3p $\Delta\text{CT}$ | MIR-370 $\Delta\text{CT}$ | MIR-330-3p $\Delta\text{CT}$ | MIR-15a $\Delta\text{CT}$ | MIR-501 $\Delta\text{CT}$ | MIR-98 $\Delta\text{CT}$ | MIR-346 $\Delta\text{CT}$ | MIR-152 $\Delta\text{CT}$ | MIR-181c $\Delta\text{CT}$ | MIR-184 $\Delta\text{CT}$ |
| 7025                                                                                 | 16.22                      | -0.29                     | 2.13                         | -1.08                     | -1.54                        | 3.38                      | 5.47                         | 10.28                     | 8.71                      | 5.25                     | 5.83                      | 7.57                      | 8.12                       | 4.16                      |
| 7029                                                                                 | 21.19                      | 0.05                      | 2.88                         | -0.14                     | -1.18                        | 3.58                      | 7.33                         | 9.00                      | 7.92                      | 8.94                     | 4.95                      | 7.40                      | 10.68                      | 9.08                      |
| 7040                                                                                 | 20.25                      | -0.89                     | 1.46                         | -1.75                     | -2.22                        | 2.45                      | 4.91                         | 6.55                      | 12.03                     | 8.22                     | 4.87                      | 8.15                      | 8.01                       | 5.75                      |
| 7047                                                                                 | 20.36                      | -0.68                     | 2.12                         | -1.15                     | -1.95                        | 2.28                      | 4.70                         | 11.97                     | 10.42                     | 4.71                     | 3.38                      | 6.83                      | 8.14                       | 6.62                      |
| 7076                                                                                 | 20.58                      | -1.30                     | 2.22                         | -0.26                     | -2.78                        | 2.75                      | 4.88                         | 5.83                      | 7.88                      | 11.40                    | 4.43                      | 7.98                      | 8.69                       | 7.50                      |
| 8018                                                                                 | 19.27                      | -1.71                     | 1.38                         | -0.29                     | -2.18                        | 1.85                      | 5.23                         | 3.97                      | 7.43                      | 10.20                    | 4.52                      | 7.06                      | 8.36                       | 6.69                      |
| 8046                                                                                 | 19.94                      | -1.20                     | 1.08                         | -0.53                     | -2.11                        | 1.23                      | 5.42                         | 6.07                      | 9.67                      | 6.89                     | 3.87                      | 7.12                      | 9.44                       | 2.76                      |
| 8074                                                                                 | 20.47                      | -1.65                     | 1.63                         | -1.24                     | -2.19                        | 2.23                      | 4.57                         | 9.97                      | 8.87                      | 6.52                     | 3.39                      | 6.65                      | 7.54                       | 7.86                      |
| 376                                                                                  | 19.20                      | -2.15                     | 0.77                         | -1.34                     | -2.81                        | 1.48                      | 4.08                         | 3.67                      | 6.99                      | 3.69                     | 3.68                      | 4.00                      | 6.23                       | 1.16                      |
| 2193                                                                                 | 22.99                      | -0.40                     | 8.75                         | -0.50                     | -1.70                        | 3.55                      | 6.08                         | 9.87                      | 7.43                      | 6.13                     | 5.12                      | 7.73                      | 9.20                       | 4.44                      |
| 2242                                                                                 | 22.75                      | -0.31                     | 2.48                         | -0.36                     | -0.82                        | 3.73                      | 6.07                         | 8.65                      | 7.90                      | 6.40                     | 6.34                      | 8.82                      | 9.10                       | 3.01                      |
| 3055                                                                                 | 21.25                      | -0.67                     | 1.52                         | -0.72                     | -1.52                        | 2.66                      | 5.64                         | 7.32                      | 11.52                     | 8.96                     | 4.27                      | 8.33                      | 9.41                       | 5.29                      |
| 3077                                                                                 | 22.41                      | -0.20                     | 2.38                         | -0.44                     | -1.12                        | 3.37                      | 6.36                         | 8.91                      | 8.54                      | 6.23                     | 4.22                      | 8.19                      | 9.84                       | 3.52                      |
| 4021                                                                                 | 21.33                      | -0.05                     | 2.13                         | -0.20                     | -0.62                        | 2.91                      | 6.44                         | 11.77                     | 6.54                      | 11.20                    | 5.35                      | 9.00                      | 9.40                       | 7.84                      |
| 4085                                                                                 | 21.54                      | 1.50                      | 2.69                         | 0.18                      | 0.24                         | 2.60                      | 7.67                         | 12.19                     | 19.22                     | 21.54                    | 8.94                      | 11.51                     | 12.05                      | 9.77                      |
| 4193                                                                                 | 21.04                      | -1.70                     | 1.18                         | -0.60                     | -1.99                        | 2.01                      | 5.32                         | 7.04                      | 9.10                      | 6.52                     | 3.29                      | 6.91                      | 8.96                       | 6.27                      |
| 5031                                                                                 | 19.85                      | -1.00                     | 1.94                         | 1.23                      | -1.46                        | 2.59                      | 6.19                         | 8.54                      | 13.74                     | 9.40                     | 6.37                      | 6.11                      | 9.02                       | 9.01                      |
| 5106                                                                                 | 20.80                      | 0.75                      | 2.49                         | -0.64                     | -0.26                        | 3.07                      | 6.94                         | 9.48                      | 8.91                      | 8.71                     | 7.02                      | 7.87                      | 11.07                      | 8.84                      |
| 5123                                                                                 | 20.50                      | -1.06                     | 1.37                         | -0.30                     | -1.88                        | 1.77                      | 5.06                         | 5.48                      | 12.43                     | 7.12                     | 3.93                      | 6.07                      | 9.08                       | 2.60                      |
| 6001                                                                                 | 16.98                      | -0.05                     | 1.99                         | -0.56                     | -0.76                        | 1.23                      | 5.36                         | 10.82                     | 7.31                      | 8.77                     | 5.12                      | 9.07                      | 9.75                       | 10.33                     |
| 6017                                                                                 | 21.83                      | -0.45                     | 2.33                         | -0.51                     | -1.36                        | 3.49                      | 5.96                         | 12.61                     | 8.01                      | 8.81                     | 6.28                      | 8.25                      | 9.21                       | 8.04                      |
| 6095                                                                                 | 21.82                      | 0.22                      | 1.60                         | 0.09                      | -1.74                        | 2.62                      | 5.87                         | 10.87                     | 9.20                      | 8.13                     | 5.60                      | 8.88                      | 11.14                      | 5.42                      |
| 6101                                                                                 | 21.29                      | 0.32                      | 2.40                         | 0.28                      | -0.33                        | 2.60                      | 7.12                         | 11.73                     | 11.81                     | 7.30                     | 5.84                      | 8.26                      | 9.60                       | 3.56                      |
| 7031                                                                                 | 22.49                      | 0.28                      | 2.45                         | -0.13                     | -0.87                        | 3.82                      | 6.55                         | 6.82                      | 7.82                      | 9.97                     | 5.28                      | 9.89                      | 9.78                       | 9.16                      |
| 7042                                                                                 | 21.42                      | -0.14                     | 1.20                         | -1.38                     | -1.81                        | 2.83                      | 5.42                         | 12.44                     | 11.30                     | 6.84                     | 5.85                      | 10.28                     | 10.50                      | 9.78                      |
| 7089                                                                                 | 20.53                      | -1.44                     | 1.29                         | -0.93                     | -2.19                        | 2.25                      | 6.52                         | 7.72                      | 10.54                     | 8.20                     | 3.91                      | 7.54                      | 9.00                       | 4.82                      |
| 8017                                                                                 | 20.67                      | -0.98                     | 1.68                         | -0.87                     | -1.57                        | 2.66                      | 5.67                         | 8.05                      | 11.52                     | 10.73                    | 3.73                      | 6.14                      | 8.36                       | 8.14                      |
| 8053                                                                                 | 17.89                      | -1.05                     | 1.70                         | -1.16                     | -1.95                        | 2.00                      | 5.28                         | 10.20                     | 10.27                     | 6.93                     | 5.30                      | 6.68                      | 9.31                       | 7.93                      |
| 8066                                                                                 | 20.02                      | -0.60                     | 2.11                         | -0.42                     | -1.06                        | 1.60                      | 6.06                         | 10.89                     | 9.11                      | 6.64                     | 5.13                      | 7.35                      | 9.42                       | 2.03                      |



| SampleID |  |
|----------|--|
| 406      |  |
| 2257     |  |
| 3010     |  |
| 3027     |  |
| 3076     |  |
| 3171     |  |
| 4059     |  |
| 5033     |  |
| 5126     |  |
| 5144     |  |
| 5275     |  |
| 6039     |  |
| 6085     |  |
| 7025     |  |
| 7029     |  |
| 7040     |  |
| 7047     |  |
| 7076     |  |
| 8018     |  |
| 8046     |  |
| 8074     |  |
| 376      |  |
| 2193     |  |
| 2242     |  |
| 3055     |  |
| 3077     |  |
| 4021     |  |
| 4085     |  |
| 4193     |  |
| 5031     |  |
| 5106     |  |
| 5123     |  |
| 6001     |  |
| 6017     |  |
| 6095     |  |
| 6101     |  |
| 7031     |  |
| 7042     |  |
| 7089     |  |
| 8017     |  |
| 8053     |  |
| 8066     |  |
| 406      |  |
| 2257     |  |
| 3010     |  |
| 3027     |  |
| 3076     |  |
| 3171     |  |
| 4059     |  |
| 5033     |  |
| 5126     |  |
| 5144     |  |
| 5275     |  |
| 6039     |  |
| 6085     |  |

**Supplemental Table 2.** Phase II qRT-PCR results for 21 miRNA in 21 AD and control cerebellum (CB) and hippocampus (HP).

At least 3 miRNA were chosen from each phase I  
 RQ = AD HP / Control HP quartile for validation using  
 qRT-PCR (of 21 miRNA). Assay replicate means are shown here  
 for raw CT, 41-CT and  $\Delta$ CTs.

Supplemental Table 2

| <u>SampleID</u> |
|-----------------|
| 7025            |
| 7029            |
| 7040            |
| 7047            |
| 7076            |
| 8018            |
| 8046            |
| 8074            |
| 376             |
| 2193            |
| 2242            |
| 3055            |
| 3077            |
| 4021            |
| 4085            |
| 4193            |
| 5031            |
| 5106            |
| 5123            |
| 6001            |
| 6017            |
| 6095            |
| 6101            |
| 7031            |
| 7042            |
| 7089            |
| 8017            |
| 8053            |
| 8066            |

Supplemental Table 3.

| MiRNA      | Mean Raw CT |          |       |       | Mean 41-CT |          |       |       | Relative Quantification Ratio = (Mean41-CT) / (Mean41-CT) |              |           |                 |
|------------|-------------|----------|-------|-------|------------|----------|-------|-------|-----------------------------------------------------------|--------------|-----------|-----------------|
|            | Cntrl CB    | Cntrl HP | AD CB | AD HP | Cntrl CB   | Cntrl HP | AD CB | AD HP | ADHP/CntrlHP                                              | ADCB/CntrlCB | ADHP/ADCB | CntrlHP/CntrlCB |
| MiR-15a    | 23.51       | 28.21    | 24.48 | 26.65 | 17.49      | 12.79    | 16.52 | 14.35 | 1.123                                                     | 0.945        | 0.869     | 0.731           |
| MiR-501    | 26.03       | 28.89    | 26.36 | 28.73 | 14.97      | 12.11    | 14.64 | 12.27 | 1.013                                                     | 0.978        | 0.838     | 0.809           |
| MiR-208b   | 38.96       | 39.81    | 38.98 | 39.71 | 2.04       | 1.19     | 2.02  | 1.29  | 1.089                                                     | 0.990        | 0.642     | 0.584           |
| MiR-181c   | 27.53       | 28.42    | 27.56 | 28.35 | 13.47      | 12.58    | 13.44 | 12.65 | 1.006                                                     | 0.998        | 0.941     | 0.934           |
| MiR-346    | 24.22       | 24.19    | 25.42 | 24.24 | 16.78      | 16.81    | 15.58 | 16.76 | 0.997                                                     | 0.929        | 1.076     | 1.002           |
| MiR-342-3p | 16.25       | 17.61    | 16.39 | 17.85 | 24.75      | 23.39    | 24.61 | 23.15 | 0.990                                                     | 0.994        | 0.941     | 0.945           |
| MiR-3303p  | 24.75       | 24.91    | 24.79 | 25.18 | 16.25      | 16.09    | 16.21 | 15.82 | 0.983                                                     | 0.997        | 0.976     | 0.990           |
| MiR-152    | 26.83       | 26.87    | 26.86 | 27.19 | 14.17      | 14.13    | 14.14 | 13.81 | 0.977                                                     | 0.998        | 0.976     | 0.997           |
| MiR-191    | 18.00       | 18.49    | 18.07 | 18.86 | 23.00      | 22.51    | 22.93 | 22.14 | 0.983                                                     | 0.997        | 0.965     | 0.979           |
| MiR-98     | 25.22       | 27.41    | 25.82 | 27.83 | 15.78      | 13.59    | 15.18 | 13.17 | 0.969                                                     | 0.962        | 0.868     | 0.861           |
| MiR-149    | 18.41       | 18.48    | 18.79 | 18.98 | 22.59      | 22.52    | 22.21 | 22.02 | 0.978                                                     | 0.983        | 0.992     | 0.997           |
| MiR-331-3p | 19.85       | 21.14    | 20.21 | 21.63 | 21.15      | 19.86    | 20.79 | 19.37 | 0.975                                                     | 0.983        | 0.931     | 0.939           |
| MiR-328    | 20.26       | 20.00    | 20.36 | 20.50 | 20.74      | 21.00    | 20.64 | 20.50 | 0.976                                                     | 0.995        | 0.993     | 1.012           |
| MiR-126    | 19.11       | 19.16    | 19.15 | 19.69 | 21.89      | 21.84    | 21.85 | 21.31 | 0.976                                                     | 0.998        | 0.975     | 0.998           |
| MiR-370    | 22.63       | 21.54    | 22.89 | 22.11 | 18.37      | 19.46    | 18.11 | 18.89 | 0.970                                                     | 0.986        | 1.043     | 1.060           |
| MiR-138    | 21.17       | 19.23    | 21.05 | 20.02 | 19.83      | 21.77    | 19.95 | 20.98 | 0.964                                                     | 1.006        | 1.052     | 1.098           |
| MiR-204    | 17.72       | 20.20    | 18.35 | 21.02 | 23.28      | 20.80    | 22.65 | 19.98 | 0.961                                                     | 0.973        | 0.882     | 0.893           |
| MiR-139-5p | 22.16       | 18.25    | 22.52 | 19.21 | 18.84      | 22.75    | 18.48 | 21.79 | 0.958                                                     | 0.981        | 1.179     | 1.208           |
| MiR-132    | 20.69       | 19.49    | 21.20 | 20.49 | 20.31      | 21.51    | 19.80 | 20.51 | 0.954                                                     | 0.975        | 1.036     | 1.059           |
| MiR-211    | 18.18       | 18.81    | 19.43 | 19.90 | 22.82      | 22.19    | 21.57 | 21.10 | 0.951                                                     | 0.945        | 0.978     | 0.972           |
| MiR-184    | 26.70       | 25.16    | 26.76 | 26.92 | 14.30      | 15.84    | 14.24 | 14.08 | 0.889                                                     | 0.996        | 0.989     | 1.108           |

Supplemental Table 3.

| MiRNA      | $\Delta CT = (\text{Mean Raw CT miRNA}) - (\text{Mean Raw CT mean endogenous controls})$ |                                   |                                |                                | $\Delta\Delta CT = \text{Mean } \Delta CT_{\text{brain region 1}} - \text{Mean } \Delta CT_{\text{brain region 2}}$ |                                           |                                        |                                              |
|------------|------------------------------------------------------------------------------------------|-----------------------------------|--------------------------------|--------------------------------|---------------------------------------------------------------------------------------------------------------------|-------------------------------------------|----------------------------------------|----------------------------------------------|
|            | Mean $\Delta CT_{\text{CntrlCB}}$                                                        | Mean $\Delta CT_{\text{CntrlHP}}$ | Mean $\Delta CT_{\text{ADCB}}$ | Mean $\Delta CT_{\text{ADHP}}$ | $\Delta\Delta CT_{\text{[ADHP-CntrlHP]}}$                                                                           | $\Delta\Delta CT_{\text{[ADCB-CntrlCB]}}$ | $\Delta\Delta CT_{\text{[ADHP-ADCB]}}$ | $\Delta\Delta CT_{\text{[CntrlHP-CntrlCB]}}$ |
| MiR-15a    | 4.89                                                                                     | 9.29                              | 5.41                           | 6.88                           | -2.41                                                                                                               | 0.51                                      | 1.48                                   | 4.40                                         |
| MiR-501    | 7.42                                                                                     | 9.96                              | 7.29                           | 8.97                           | -1.00                                                                                                               | -0.13                                     | 1.68                                   | 2.54                                         |
| MiR-208b   | 20.35                                                                                    | 20.89                             | 19.91                          | 19.94                          | -0.94                                                                                                               | -0.44                                     | 0.03                                   | 0.54                                         |
| MiR-181c   | 8.92                                                                                     | 9.50                              | 8.49                           | 8.58                           | -0.91                                                                                                               | -0.43                                     | 0.09                                   | 0.58                                         |
| MiR-346    | 5.61                                                                                     | 5.27                              | 6.35                           | 4.47                           | -0.79                                                                                                               | 0.74                                      | -1.88                                  | -0.34                                        |
| MiR-342-3p | -2.36                                                                                    | -1.31                             | -2.68                          | -1.92                          | -0.60                                                                                                               | -0.32                                     | 0.77                                   | 1.05                                         |
| MiR-3303p  | 6.13                                                                                     | 5.98                              | 5.72                           | 5.42                           | -0.56                                                                                                               | -0.41                                     | -0.30                                  | -0.15                                        |
| MiR-152    | 8.22                                                                                     | 7.95                              | 7.79                           | 7.43                           | -0.52                                                                                                               | -0.43                                     | -0.36                                  | -0.27                                        |
| MiR-191    | -0.62                                                                                    | -0.44                             | -1.00                          | -0.90                          | -0.47                                                                                                               | -0.39                                     | 0.10                                   | 0.18                                         |
| MiR-98     | 6.61                                                                                     | 8.49                              | 6.75                           | 8.06                           | -0.42                                                                                                               | 0.14                                      | 1.31                                   | 1.88                                         |
| MiR-149    | -0.20                                                                                    | -0.44                             | -0.28                          | -0.78                          | -0.34                                                                                                               | -0.07                                     | -0.51                                  | -0.24                                        |
| MiR-331-3p | 1.24                                                                                     | 2.21                              | 1.14                           | 1.87                           | -0.34                                                                                                               | -0.10                                     | 0.73                                   | 0.97                                         |
| MiR-328    | 1.65                                                                                     | 1.08                              | 1.29                           | 0.74                           | -0.34                                                                                                               | -0.36                                     | -0.55                                  | -0.57                                        |
| MiR-126    | 0.49                                                                                     | 0.24                              | 0.08                           | -0.08                          | -0.31                                                                                                               | -0.42                                     | -0.15                                  | -0.26                                        |
| MiR-370    | 4.02                                                                                     | 2.61                              | 3.82                           | 2.35                           | -0.26                                                                                                               | -0.20                                     | -1.47                                  | -1.41                                        |
| MiR-138    | 2.56                                                                                     | 0.31                              | 1.97                           | 0.25                           | -0.05                                                                                                               | -0.58                                     | -1.72                                  | -2.25                                        |
| MiR-204    | -0.89                                                                                    | 1.28                              | -0.72                          | 1.26                           | -0.02                                                                                                               | 0.17                                      | 1.98                                   | 2.17                                         |
| MiR-139-5p | 3.55                                                                                     | -0.68                             | 3.45                           | -0.56                          | 0.12                                                                                                                | -0.09                                     | -4.01                                  | -4.22                                        |
| MiR-132    | 2.07                                                                                     | 0.57                              | 2.13                           | 0.72                           | 0.16                                                                                                                | 0.06                                      | -1.41                                  | -1.51                                        |
| MiR-211    | -0.44                                                                                    | -0.11                             | 0.36                           | 0.14                           | 0.25                                                                                                                | 0.80                                      | -0.23                                  | 0.32                                         |
| MiR-184    | 8.09                                                                                     | 6.24                              | 7.69                           | 7.16                           | 0.92                                                                                                                | -0.40                                     | -0.53                                  | -1.85                                        |

Supplemental Table 3.

| MiRNA      | Relative Quantification $\Delta\text{CT} = 2^{-\Delta\Delta\text{CT}}$ - Mean $\Delta\Delta\text{CT}$ |                                                   |                                                |                                                      |
|------------|-------------------------------------------------------------------------------------------------------|---------------------------------------------------|------------------------------------------------|------------------------------------------------------|
|            | $2^{-\Delta\Delta\text{CT}[\text{ADHP-CntrlHP}]}$                                                     | $2^{-\Delta\Delta\text{CT}[\text{ADCB-CntrlCB}]}$ | $2^{-\Delta\Delta\text{CT}[\text{ADHP-ADCB}]}$ | $2^{-\Delta\Delta\text{CT}[\text{CntrlHP-CntrlCB}]}$ |
| MiR-15a    | 22.18                                                                                                 | 1.20                                              | 0.46                                           | 0.02                                                 |
| MiR-501    | 5.42                                                                                                  | 2.29                                              | 0.37                                           | 0.16                                                 |
| MiR-208b   | 5.14                                                                                                  | 3.10                                              | 1.94                                           | 1.17                                                 |
| MiR-181c   | 4.98                                                                                                  | 3.08                                              | 1.82                                           | 1.12                                                 |
| MiR-346    | 4.41                                                                                                  | 0.95                                              | 13.04                                          | 2.81                                                 |
| MiR-342-3p | 3.66                                                                                                  | 2.76                                              | 0.93                                           | 0.70                                                 |
| MiR-3303p  | 3.51                                                                                                  | 3.01                                              | 2.71                                           | 2.32                                                 |
| MiR-152    | 3.35                                                                                                  | 3.07                                              | 2.86                                           | 2.62                                                 |
| MiR-191    | 3.19                                                                                                  | 2.94                                              | 1.81                                           | 1.67                                                 |
| MiR-98     | 3.05                                                                                                  | 1.73                                              | 0.54                                           | 0.31                                                 |
| MiR-149    | 2.82                                                                                                  | 2.15                                              | 3.32                                           | 2.54                                                 |
| MiR-331-3p | 2.81                                                                                                  | 2.21                                              | 0.96                                           | 0.76                                                 |
| MiR-328    | 2.81                                                                                                  | 2.87                                              | 3.46                                           | 3.53                                                 |
| MiR-126    | 2.73                                                                                                  | 3.04                                              | 2.33                                           | 2.59                                                 |
| MiR-370    | 2.60                                                                                                  | 2.43                                              | 8.73                                           | 8.17                                                 |
| MiR-138    | 2.11                                                                                                  | 3.57                                              | 11.21                                          | 18.96                                                |
| MiR-204    | 2.04                                                                                                  | 1.68                                              | 0.28                                           | 0.23                                                 |
| MiR-139-5p | 1.77                                                                                                  | 2.20                                              | 110.05                                         | 136.53                                               |
| MiR-132    | 1.71                                                                                                  | 1.89                                              | 8.19                                           | 9.04                                                 |
| MiR-211    | 1.56                                                                                                  | 0.90                                              | 2.51                                           | 1.45                                                 |
| MiR-184    | 0.80                                                                                                  | 2.97                                              | 3.41                                           | 12.75                                                |

Supplemental Table 3.

| MiRNA      |                                                                                                                                                                                                                                                                                                                                                                    |
|------------|--------------------------------------------------------------------------------------------------------------------------------------------------------------------------------------------------------------------------------------------------------------------------------------------------------------------------------------------------------------------|
| MiR-15a    | <b>Supplemental Table 3.</b> Phase II qRT-PCR Relative Quantification (RQ) results for 21 miRNA in 21 AD and control cerebellum (CB) and hippocampus (HP).<br><br>At least 3 miRNA were selected from each phase I<br>RQ = AD HP / Control HP quartile for validation using qRT-PCR (of 21 miRNA). RQ ratios and RQ $\Delta$ CT are shown here for these 21 miRNA. |
| MiR-501    |                                                                                                                                                                                                                                                                                                                                                                    |
| MiR-208b   |                                                                                                                                                                                                                                                                                                                                                                    |
| MiR-181c   |                                                                                                                                                                                                                                                                                                                                                                    |
| MiR-346    |                                                                                                                                                                                                                                                                                                                                                                    |
| MiR-342-3p |                                                                                                                                                                                                                                                                                                                                                                    |
| MiR-3303p  |                                                                                                                                                                                                                                                                                                                                                                    |
| MiR-152    |                                                                                                                                                                                                                                                                                                                                                                    |
| MiR-191    |                                                                                                                                                                                                                                                                                                                                                                    |
| MiR-98     |                                                                                                                                                                                                                                                                                                                                                                    |
| MiR-149    |                                                                                                                                                                                                                                                                                                                                                                    |
| MiR-331-3p |                                                                                                                                                                                                                                                                                                                                                                    |
| MiR-328    |                                                                                                                                                                                                                                                                                                                                                                    |
| MiR-126    |                                                                                                                                                                                                                                                                                                                                                                    |
| MiR-370    |                                                                                                                                                                                                                                                                                                                                                                    |
| MiR-138    |                                                                                                                                                                                                                                                                                                                                                                    |
| MiR-204    |                                                                                                                                                                                                                                                                                                                                                                    |
| MiR-139-5p |                                                                                                                                                                                                                                                                                                                                                                    |
| MiR-132    |                                                                                                                                                                                                                                                                                                                                                                    |
| MiR-211    |                                                                                                                                                                                                                                                                                                                                                                    |
| MiR-184    |                                                                                                                                                                                                                                                                                                                                                                    |

Supplemental Table 4.

| A          | Hippocampus 41- CT                                        |        |               |         |                  |                               | Hippocampus 41- CT               |        |               |         |                  |                               |
|------------|-----------------------------------------------------------|--------|---------------|---------|------------------|-------------------------------|----------------------------------|--------|---------------|---------|------------------|-------------------------------|
|            | Plaque Score (absent, sparse, moderate = 0, frequent = 1) |        |               |         |                  |                               | Braak Stage (I-IV = 0, V,VI = 1) |        |               |         |                  |                               |
|            | miRNA Name                                                | AUC    | Std. Error    | p-value | Adjusted p-value | 95% Confidence Interval Lower | 95% Confidence Interval Upper    | AUC    | Std. Error    | p-value | Adjusted p-value | 95% Confidence Interval Lower |
| miR-126    | 0.7476                                                    | 0.0749 | <b>0.0076</b> | 0.1596  | 0.6008           | 0.8944                        | 0.7094                           | 0.0820 | <b>0.0208</b> | 0.4360  | 0.5486           | 0.8701                        |
| miR-132    | 0.7740                                                    | 0.0716 | <b>0.0032</b> | 0.0672  | 0.6336           | 0.9144                        | 0.7574                           | 0.0769 | <b>0.0045</b> | 0.0945  | 0.6067           | 0.9081                        |
| miR-138    | 0.7476                                                    | 0.0748 | <b>0.0076</b> | 0.1596  | 0.6011           | 0.8941                        | 0.7437                           | 0.0781 | <b>0.0071</b> | 0.1491  | 0.5906           | 0.8968                        |
| miR-139-5p | 0.5841                                                    | 0.0934 | 0.3647        | 1.0000  | 0.4011           | 0.7672                        | 0.5789                           | 0.0902 | 0.3833        | 1.0000  | 0.4021           | 0.7558                        |
| miR-149    | 0.6731                                                    | 0.0878 | 0.0622        | 1.0000  | 0.5010           | 0.8451                        | 0.5973                           | 0.0884 | 0.2828        | 1.0000  | 0.4240           | 0.7705                        |
| miR-152    | 0.6995                                                    | 0.0808 | <b>0.0316</b> | 0.6636  | 0.5411           | 0.8579                        | 0.6087                           | 0.0882 | 0.2300        | 1.0000  | 0.4358           | 0.7816                        |
| miR-15a    | 0.2524                                                    | 0.0782 | <b>0.0076</b> | 0.1596  | 0.0991           | 0.4057                        | 0.3661                           | 0.0876 | 0.1393        | 1.0000  | 0.1944           | 0.5379                        |
| miR-181c   | 0.6250                                                    | 0.0892 | 0.1780        | 1.0000  | 0.4503           | 0.7997                        | 0.5309                           | 0.0914 | 0.7330        | 1.0000  | 0.3518           | 0.7100                        |
| miR-184    | 0.6659                                                    | 0.0841 | 0.0739        | 1.0000  | 0.5010           | 0.8307                        | 0.6705                           | 0.0834 | 0.0597        | 1.0000  | 0.5069           | 0.8340                        |
| miR-191    | 0.6899                                                    | 0.0815 | <b>0.0407</b> | 0.8547  | 0.5302           | 0.8496                        | 0.6178                           | 0.0880 | 0.1931        | 1.0000  | 0.4453           | 0.7904                        |
| miR-204    | 0.5481                                                    | 0.0953 | 0.6044        | 1.0000  | 0.3614           | 0.7348                        | 0.4897                           | 0.0927 | 0.9095        | 1.0000  | 0.3079           | 0.6715                        |
| miR-208b   | 0.5300                                                    | 0.0913 | 0.7461        | 1.0000  | 0.3511           | 0.7090                        | 0.5355                           | 0.0900 | 0.6953        | 1.0000  | 0.3590           | 0.7119                        |
| miR-211    | 0.6322                                                    | 0.0903 | 0.1543        | 1.0000  | 0.4552           | 0.8092                        | 0.4577                           | 0.0935 | 0.6401        | 1.0000  | 0.2745           | 0.6409                        |
| miR-328    | 0.7236                                                    | 0.0851 | <b>0.0160</b> | 0.3360  | 0.5567           | 0.8904                        | 0.7391                           | 0.0840 | <b>0.0083</b> | 0.1743  | 0.5745           | 0.9037                        |
| miR-330-3p | 0.6466                                                    | 0.0849 | 0.1141        | 1.0000  | 0.4803           | 0.8130                        | 0.3661                           | 0.0876 | 0.1393        | 1.0000  | 0.1944           | 0.5379                        |
| miR-331-3p | 0.6611                                                    | 0.0854 | 0.0827        | 1.0000  | 0.4938           | 0.8284                        | 0.7140                           | 0.0809 | <b>0.0181</b> | 0.3801  | 0.5554           | 0.8725                        |
| miR-342-3p | 0.6034                                                    | 0.0878 | 0.2654        | 1.0000  | 0.4313           | 0.7754                        | 0.5789                           | 0.0892 | 0.3833        | 1.0000  | 0.4041           | 0.7538                        |
| miR-346    | 0.5962                                                    | 0.0880 | 0.3002        | 1.0000  | 0.4237           | 0.7686                        | 0.4943                           | 0.0907 | 0.9496        | 1.0000  | 0.3165           | 0.6720                        |
| miR-370    | 0.6995                                                    | 0.0826 | <b>0.0316</b> | 0.6636  | 0.5376           | 0.8615                        | 0.7551                           | 0.0765 | <b>0.0048</b> | 0.1008  | 0.6053           | 0.9050                        |
| miR-501-5p | 0.5120                                                    | 0.0928 | 0.8970        | 1.0000  | 0.3302           | 0.6938                        | 0.5195                           | 0.0904 | 0.8299        | 1.0000  | 0.3423           | 0.6966                        |
| miR-98     | 0.7127                                                    | 0.0814 | 0.0219        | 0.4598  | 0.5532           | 0.8723                        | 0.5824                           | 0.0893 | 0.3630        | 1.0000  | 0.4074           | 0.7574                        |

| B          | Cerebellum 41- CT                                        |        |               |         |                  |                               | Cerebellum 41- CT                |        |               |         |                  |                               |
|------------|----------------------------------------------------------|--------|---------------|---------|------------------|-------------------------------|----------------------------------|--------|---------------|---------|------------------|-------------------------------|
|            | Plaque Score (absent, sparse, moderate = 0; frequent =1) |        |               |         |                  |                               | Braak Stage (I-IV = 0, V,VI = 1) |        |               |         |                  |                               |
|            | miRNA Name                                               | AUC    | Std. Error    | p-value | Adjusted p-value | 95% Confidence Interval Lower | 95% Confidence Interval Upper    | AUC    | Std. Error    | p-value | Adjusted p-value | 95% Confidence Interval Lower |
| miR-126    | 0.5144                                                   | 0.0986 | 0.8765        | 1.0000  | 0.3212           | 0.7077                        | 0.4256                           | 0.0942 | 0.4115        | 1.0000  | 0.2411           | 0.6102                        |
| miR-132    | 0.6563                                                   | 0.0877 | 0.0923        | 1.0000  | 0.4843           | 0.8282                        | 0.5789                           | 0.0906 | 0.3833        | 1.0000  | 0.4013           | 0.7566                        |
| miR-138    | 0.5216                                                   | 0.0989 | 0.8157        | 1.0000  | 0.3278           | 0.7155                        | 0.4302                           | 0.0952 | 0.4409        | 1.0000  | 0.2437           | 0.6167                        |
| miR-139-5p | 0.5601                                                   | 0.0978 | 0.5173        | 1.0000  | 0.3684           | 0.7518                        | 0.4462                           | 0.0914 | 0.5526        | 1.0000  | 0.2670           | 0.6254                        |
| miR-149    | 0.5865                                                   | 0.0892 | 0.3511        | 1.0000  | 0.4117           | 0.7614                        | 0.4966                           | 0.0909 | 0.9698        | 1.0000  | 0.3184           | 0.6747                        |
| miR-152    | 0.5024                                                   | 0.0957 | 0.9793        | 1.0000  | 0.3149           | 0.6899                        | 0.4531                           | 0.0918 | 0.6044        | 1.0000  | 0.2731           | 0.6331                        |
| miR-15a    | 0.7813                                                   | 0.0729 | <b>0.0024</b> | 0.0513  | 0.6384           | 0.9241                        | 0.6842                           | 0.0843 | <b>0.0419</b> | 0.8804  | 0.5190           | 0.8494                        |
| miR-181c   | 0.5529                                                   | 0.0937 | 0.5688        | 1.0000  | 0.3692           | 0.7365                        | 0.4783                           | 0.0919 | 0.8103        | 1.0000  | 0.2981           | 0.6584                        |
| miR-184    | 0.4952                                                   | 0.0938 | 0.9587        | 1.0000  | 0.3114           | 0.6790                        | 0.4371                           | 0.0921 | 0.4871        | 1.0000  | 0.2566           | 0.6175                        |
| miR-191    | 0.5986                                                   | 0.0904 | 0.2883        | 1.0000  | 0.4213           | 0.7758                        | 0.4920                           | 0.0922 | 0.9295        | 1.0000  | 0.3114           | 0.6726                        |
| miR-204    | 0.6442                                                   | 0.0889 | 0.1202        | 1.0000  | 0.4700           | 0.8184                        | 0.4668                           | 0.0932 | 0.7140        | 1.0000  | 0.2841           | 0.6495                        |
| miR-208b   | 0.5024                                                   | 0.0923 | 0.9793        | 1.0000  | 0.3215           | 0.6833                        | 0.4714                           | 0.0907 | 0.7521        | 1.0000  | 0.2936           | 0.6492                        |
| miR-211    | 0.6995                                                   | 0.0852 | <b>0.0316</b> | 0.6631  | 0.5324           | 0.8666                        | 0.5789                           | 0.0901 | 0.3833        | 1.0000  | 0.4023           | 0.7556                        |
| miR-328    | 0.5313                                                   | 0.0966 | 0.7363        | 1.0000  | 0.3420           | 0.7205                        | 0.5080                           | 0.0920 | 0.9295        | 1.0000  | 0.3277           | 0.6883                        |
| miR-330-3p | 0.5601                                                   | 0.0914 | 0.5173        | 1.0000  | 0.3809           | 0.7393                        | 0.4600                           | 0.0913 | 0.6583        | 1.0000  | 0.2809           | 0.6390                        |
| miR-331-3p | 0.6418                                                   | 0.0880 | 0.1265        | 1.0000  | 0.4694           | 0.8143                        | 0.5675                           | 0.0900 | 0.4560        | 1.0000  | 0.3911           | 0.7439                        |
| miR-342-3p | 0.5649                                                   | 0.0935 | 0.4844        | 1.0000  | 0.3816           | 0.7483                        | 0.4577                           | 0.0931 | 0.6401        | 1.0000  | 0.2753           | 0.6401                        |
| miR-346    | 0.6034                                                   | 0.0936 | 0.2654        | 1.0000  | 0.4199           | 0.7868                        | 0.4874                           | 0.0938 | 0.8895        | 1.0000  | 0.3035           | 0.6713                        |
| miR-370    | 0.6683                                                   | 0.0874 | 0.0698        | 1.0000  | 0.4969           | 0.8396                        | 0.6453                           | 0.0867 | 0.1086        | 1.0000  | 0.4753           | 0.8153                        |
| miR-501-5p | 0.5385                                                   | 0.0962 | 0.6786        | 1.0000  | 0.3499           | 0.7270                        | 0.5286                           | 0.0942 | 0.7521        | 1.0000  | 0.3439           | 0.7133                        |
| miR-98     | 0.6022                                                   | 0.0898 | 0.2710        | 1.0000  | 0.4262           | 0.7782                        | 0.5183                           | 0.0913 | 0.8398        | 1.0000  | 0.3393           | 0.6973                        |

Supplemental Table 4.

| C          | Hippocampus $\Delta$ CT                                   |            |               |                  |                         |        | Hippocampus $\Delta$ CT          |            |               |                  |                         |        |
|------------|-----------------------------------------------------------|------------|---------------|------------------|-------------------------|--------|----------------------------------|------------|---------------|------------------|-------------------------|--------|
|            | Plaque Score (absent, sparse, moderate = 0, frequent = 1) |            |               |                  |                         |        | Braak Stage (I-IV = 0, V,VI = 1) |            |               |                  |                         |        |
|            | AUC                                                       | Std. Error | p-value       | Adjusted p-value | 95% Confidence Interval |        | AUC                              | Std. Error | p-value       | Adjusted p-value | 95% Confidence Interval |        |
| miRNA Name |                                                           |            |               |                  | Lower                   | Upper  |                                  |            |               |                  | Lower                   | Upper  |
| miR-126    | 0.5111                                                    | 0.0938     | 0.9060        | 1.0000           | 0.3272                  | 0.6950 | 0.4050                           | 0.0910     | 0.2943        | 1.0000           | 0.2266                  | 0.5835 |
| miR-132    | 0.6321                                                    | 0.0894     | 0.1602        | 1.0000           | 0.4569                  | 0.8073 | 0.5744                           | 0.0897     | 0.4115        | 1.0000           | 0.3986                  | 0.7501 |
| miR-138    | 0.6247                                                    | 0.0935     | 0.1850        | 1.0000           | 0.4415                  | 0.8079 | 0.5263                           | 0.0905     | 0.7713        | 1.0000           | 0.3489                  | 0.7037 |
| miR-139-5p | 0.5037                                                    | 0.1045     | 0.9686        | 1.0000           | 0.2989                  | 0.7085 | 0.4256                           | 0.0917     | 0.4115        | 1.0000           | 0.2459                  | 0.6054 |
| miR-149    | 0.5185                                                    | 0.0927     | 0.8439        | 1.0000           | 0.3369                  | 0.7002 | 0.3524                           | 0.0862     | 0.1031        | 1.0000           | 0.1834                  | 0.5214 |
| miR-152    | 0.5111                                                    | 0.0909     | 0.9060        | 1.0000           | 0.3330                  | 0.6892 | 0.3913                           | 0.0889     | 0.2300        | 1.0000           | 0.2170                  | 0.5656 |
| miR-15a    | 0.1679                                                    | 0.0618     | <b>0.0004</b> | <b>0.0087</b>    | 0.0468                  | 0.2890 | 0.2723                           | 0.0785     | <b>0.0119</b> | 0.2504           | 0.1185                  | 0.4261 |
| miR-181c   | 0.4444                                                    | 0.0968     | 0.5548        | 1.0000           | 0.2547                  | 0.6342 | 0.3501                           | 0.0913     | 0.0979        | 1.0000           | 0.1712                  | 0.5290 |
| miR-184    | 0.5728                                                    | 0.0901     | 0.4387        | 1.0000           | 0.3963                  | 0.7494 | 0.5995                           | 0.0882     | 0.2716        | 1.0000           | 0.4267                  | 0.7723 |
| miR-191    | 0.4667                                                    | 0.0989     | 0.7231        | 1.0000           | 0.2728                  | 0.6606 | 0.3730                           | 0.0883     | 0.1608        | 1.0000           | 0.1999                  | 0.5461 |
| miR-204    | 0.5086                                                    | 0.1004     | 0.9268        | 1.0000           | 0.3118                  | 0.7054 | 0.3661                           | 0.0908     | 0.1393        | 1.0000           | 0.1883                  | 0.5440 |
| miR-208b   | 0.3877                                                    | 0.0869     | 0.2323        | 1.0000           | 0.2173                  | 0.5580 | 0.2975                           | 0.0825     | <b>0.0253</b> | 0.5318           | 0.1358                  | 0.4591 |
| miR-211    | 0.6123                                                    | 0.0963     | 0.2323        | 1.0000           | 0.4236                  | 0.8011 | 0.3936                           | 0.0931     | 0.2400        | 1.0000           | 0.2111                  | 0.5761 |
| miR-328    | 0.5333                                                    | 0.0966     | 0.7231        | 1.0000           | 0.3439                  | 0.7227 | 0.4828                           | 0.0927     | 0.8497        | 1.0000           | 0.3011                  | 0.6646 |
| miR-330-3p | 0.4765                                                    | 0.0934     | 0.8031        | 1.0000           | 0.2934                  | 0.6597 | 0.3295                           | 0.0877     | 0.0597        | 1.0000           | 0.1576                  | 0.5015 |
| miR-331-3p | 0.4420                                                    | 0.0967     | 0.5373        | 1.0000           | 0.2525                  | 0.6314 | 0.4622                           | 0.0914     | 0.6767        | 1.0000           | 0.2832                  | 0.6413 |
| miR-342-3p | 0.3901                                                    | 0.0936     | 0.2428        | 1.0000           | 0.2068                  | 0.5735 | 0.3066                           | 0.0835     | <b>0.0327</b> | 0.6874           | 0.1430                  | 0.4703 |
| miR-346    | 0.4864                                                    | 0.0910     | 0.8852        | 1.0000           | 0.3080                  | 0.6649 | 0.3341                           | 0.0849     | 0.0669        | 1.0000           | 0.1677                  | 0.5005 |
| miR-370    | 0.4988                                                    | 0.0925     | 0.9895        | 1.0000           | 0.3175                  | 0.6800 | 0.4211                           | 0.0899     | 0.3833        | 1.0000           | 0.2449                  | 0.5972 |
| miR-501-5p | 0.4395                                                    | 0.0939     | 0.5201        | 1.0000           | 0.2554                  | 0.6236 | 0.4416                           | 0.0901     | 0.5193        | 1.0000           | 0.2651                  | 0.6182 |
| miR-98     | 0.7012                                                    | 0.0845     | 0.0324        | 1.0000           | 0.6805                  | 0.5355 | 0.8669                           | 0.0912     | 0.9496        | 1.0000           | 0.3270                  | 0.6844 |

| D          | Cerebellum $\Delta$ CT                                    |            |               |                  |                         |        | Cerebellum $\Delta$ CT           |            |         |                  |                         |        |
|------------|-----------------------------------------------------------|------------|---------------|------------------|-------------------------|--------|----------------------------------|------------|---------|------------------|-------------------------|--------|
|            | Plaque Score (absent, sparse, moderate = 0; frequent = 1) |            |               |                  |                         |        | Braak Stage (I-IV = 0, V,VI = 1) |            |         |                  |                         |        |
|            | AUC                                                       | Std. Error | p-value       | Adjusted p-value | 95% Confidence Interval |        | AUC                              | Std. Error | p-value | Adjusted p-value | 95% Confidence Interval |        |
| miRNA Name |                                                           |            |               |                  | Lower                   | Upper  |                                  |            |         |                  | Lower                   | Upper  |
| miR-126    | 0.5210                                                    | 0.1011     | 0.8234        | 1.0000           | 0.3228                  | 0.7192 | 0.4531                           | 0.0923     | 0.6044  | 1.0000           | 0.2721                  | 0.6340 |
| miR-132    | 0.5802                                                    | 0.0932     | 0.3936        | 1.0000           | 0.3977                  | 0.7628 | 0.5698                           | 0.0900     | 0.4409  | 1.0000           | 0.3934                  | 0.7462 |
| miR-138    | 0.3827                                                    | 0.0919     | 0.2124        | 1.0000           | 0.2026                  | 0.5628 | 0.3295                           | 0.0852     | 0.0597  | 1.0000           | 0.1624                  | 0.4966 |
| miR-139-5p | 0.4864                                                    | 0.1025     | 0.8852        | 1.0000           | 0.2856                  | 0.6872 | 0.3730                           | 0.0894     | 0.1608  | 1.0000           | 0.1977                  | 0.5483 |
| miR-149    | 0.5481                                                    | 0.0979     | 0.6087        | 1.0000           | 0.3564                  | 0.7399 | 0.4783                           | 0.0922     | 0.8103  | 1.0000           | 0.2975                  | 0.6591 |
| miR-152    | 0.4642                                                    | 0.0930     | 0.7035        | 1.0000           | 0.2818                  | 0.6466 | 0.4233                           | 0.0914     | 0.3972  | 1.0000           | 0.2443                  | 0.6024 |
| miR-15a    | 0.7481                                                    | 0.0782     | <b>0.0083</b> | 0.1751           | 0.5949                  | 0.9014 | 0.6819                           | 0.0845     | 0.0445  | 0.9353           | 0.5163                  | 0.8475 |
| miR-181c   | 0.4617                                                    | 0.0970     | 0.6841        | 1.0000           | 0.2716                  | 0.6518 | 0.4416                           | 0.0921     | 0.5193  | 1.0000           | 0.2611                  | 0.6222 |
| miR-184    | 0.3654                                                    | 0.0872     | 0.1525        | 1.0000           | 0.1946                  | 0.5363 | 0.3341                           | 0.0849     | 0.0669  | 1.0000           | 0.1678                  | 0.5004 |
| miR-191    | 0.5457                                                    | 0.0980     | 0.6272        | 1.0000           | 0.3536                  | 0.7377 | 0.4394                           | 0.0921     | 0.5031  | 1.0000           | 0.2588                  | 0.6199 |
| miR-204    | 0.6247                                                    | 0.0924     | 0.1850        | 1.0000           | 0.4435                  | 0.8059 | 0.4600                           | 0.0941     | 0.6583  | 1.0000           | 0.2756                  | 0.6443 |
| miR-208b   | 0.4272                                                    | 0.0940     | 0.4387        | 1.0000           | 0.2430                  | 0.6113 | 0.4142                           | 0.0889     | 0.3433  | 1.0000           | 0.2399                  | 0.5885 |
| miR-211    | 0.6642                                                    | 0.0875     | 0.0809        | 1.0000           | 0.4927                  | 0.8357 | 0.5469                           | 0.0899     | 0.6044  | 1.0000           | 0.3707                  | 0.7231 |
| miR-328    | 0.3432                                                    | 0.0911     | 0.0955        | 1.0000           | 0.1647                  | 0.5217 | 0.4050                           | 0.0891     | 0.2943  | 1.0000           | 0.2304                  | 0.5796 |
| miR-330-3p | 0.4123                                                    | 0.0971     | 0.3514        | 1.0000           | 0.2220                  | 0.6027 | 0.3616                           | 0.0869     | 0.1263  | 1.0000           | 0.1912                  | 0.5319 |
| miR-331-3p | 0.5679                                                    | 0.1002     | 0.4704        | 1.0000           | 0.3716                  | 0.7642 | 0.5378                           | 0.0909     | 0.6767  | 1.0000           | 0.3595                  | 0.7160 |
| miR-342-3p | 0.5679                                                    | 0.0966     | 0.4704        | 1.0000           | 0.3787                  | 0.7571 | 0.4485                           | 0.0921     | 0.5696  | 1.0000           | 0.2681                  | 0.6289 |
| miR-346    | 0.6025                                                    | 0.0915     | 0.2760        | 1.0000           | 0.4232                  | 0.7817 | 0.4622                           | 0.0925     | 0.6767  | 1.0000           | 0.2809                  | 0.6436 |
| miR-370    | 0.4765                                                    | 0.0964     | 0.8031        | 1.0000           | 0.2876                  | 0.6655 | 0.5286                           | 0.0905     | 0.7521  | 1.0000           | 0.3513                  | 0.7059 |
| miR-501-5p | 0.4889                                                    | 0.1022     | 0.9060        | 1.0000           | 0.2885                  | 0.6892 | 0.5172                           | 0.0923     | 0.8497  | 1.0000           | 0.3362                  | 0.6981 |
| miR-98     | 0.6765                                                    | 0.0816     | 0.0605        | 1.0000           | 0.5166                  | 0.8365 | 0.5652                           | 0.0908     | 0.4714  | 1.0000           | 0.3873                  | 0.7431 |



**Supplemental Table 4.** Receiver operating characteristic (ROC). ROC results for phase II qRT-PCR of 21 miRNA selected for validation. AD (n=21) and control (n=21) subjects qRT-PCR 41-CT values were utilized for this analysis.

Area under curve (AUC: c-statistic) for each miRNA 41- CT values in hippocampus (Panel A) or cerebellum (Panel B) for the categorical variables; plaque score or Braak stage.

Area under curve (AUC: c-statistic) for each miRNA  $\Delta$ CT values in hippocampus (Panel C) or cerebellum (Panel D) for the categorical variables; plaque score or Braak stage.

Significant p-values are in **bold** and are without correction for multiple comparisons. Adjusted p-values take into account comparisons across 21 miRNA using a Bonferroni method. P-values are adjusted (multiplied) according to the number of comparisons and  $p < 0.002$  ( $=0.05 / 21$ ) is the unadjusted p-value that indicates significance. All adjusted p-values  $> 1.000$ , are set at 1.0000.

Supplemental Table 5.

| A          | Hippocampus                                  |               |                |          |               |               | Hippocampus                                 |               |                |               |               |               |
|------------|----------------------------------------------|---------------|----------------|----------|---------------|---------------|---------------------------------------------|---------------|----------------|---------------|---------------|---------------|
|            | Plaque Score Continuous Independent Variable |               |                |          |               |               | Braak Stage Continuous Independent Variable |               |                |               |               |               |
|            | Linear Reg. 41-CT                            | Adjusted      | Spearman 41-CT | Adjusted | Spearman ΔCT  | Adjusted      | Linear Reg. 41-CT                           | Adjusted      | Spearman 41-CT | Adjusted      | Spearman ΔCT  | Adjusted      |
| MiRNA Name | p-value                                      | p-value       | p-value        | p-value  | p-value       | p-value       | p-value                                     | p-value       | p-value        | p-value       | p-value       | p-value       |
| miR-126    | 0.7855                                       | 1.0000        | 0.1146         | 1.0000   | 0.3139        | 1.0000        | 0.0718                                      | 1.0000        | <b>0.0124</b>  | 0.2599        | 0.2345        | 1.0000        |
| miR-132    | 0.4341                                       | 1.0000        | 0.0585         | 1.0000   | 0.9826        | 1.0000        | <b>0.0080</b>                               | 0.1680        | <b>0.0013</b>  | <b>0.0279</b> | 0.6198        | 1.0000        |
| miR-138    | 0.6532                                       | 1.0000        | 0.0706         | 1.0000   | 0.8689        | 1.0000        | <b>0.0332</b>                               | 0.6972        | <b>0.0082</b>  | 0.1730        | 0.8269        | 1.0000        |
| miR-139-5p | 0.1832                                       | 1.0000        | 0.3001         | 1.0000   | 0.8455        | 1.0000        | 0.0516                                      | 1.0000        | 0.0802         | 1.0000        | 0.8688        | 1.0000        |
| miR-149    | 0.3946                                       | 1.0000        | 0.1582         | 1.0000   | 0.4636        | 1.0000        | 0.1143                                      | 1.0000        | 0.0554         | 1.0000        | 0.1692        | 1.0000        |
| miR-152    | 0.5680                                       | 1.0000        | 0.3263         | 1.0000   | 0.2523        | 1.0000        | 0.6355                                      | 1.0000        | 0.2786         | 1.0000        | 0.0601        | 1.0000        |
| miR-15a    | <b>0.0019</b>                                | <b>0.0399</b> | <b>0.0028</b>  | 0.0597   | <b>0.0000</b> | <b>0.0009</b> | <b>0.0431</b>                               | 0.9051        | 0.0660         | 1.0000        | <b>0.0010</b> | <b>0.0204</b> |
| miR-181c   | 0.4103                                       | 1.0000        | 0.9792         | 1.0000   | 0.0658        | 1.0000        | 0.6857                                      | 1.0000        | 0.4927         | 1.0000        | 0.0683        | 1.0000        |
| miR-184    | 0.9136                                       | 1.0000        | 0.6950         | 1.0000   | 0.5524        | 1.0000        | <b>0.0251</b>                               | 0.5271        | <b>0.0210</b>  | 0.4409        | 0.1932        | 1.0000        |
| miR-191    | 0.9253                                       | 1.0000        | 0.2600         | 1.0000   | 0.1233        | 1.0000        | 0.1941                                      | 1.0000        | 0.0574         | 1.0000        | 0.0760        | 1.0000        |
| miR-204    | 0.4704                                       | 1.0000        | 0.8132         | 1.0000   | 0.4862        | 1.0000        | 0.3435                                      | 1.0000        | 0.7139         | 1.0000        | 0.1868        | 1.0000        |
| miR-208b   | 0.7518                                       | 1.0000        | 0.5178         | 1.0000   | 0.0706        | 1.0000        | 0.9834                                      | 1.0000        | 0.4516         | 1.0000        | 0.0057        | 0.1204        |
| miR-211    | 0.6189                                       | 1.0000        | 0.5733         | 1.0000   | 0.9395        | 1.0000        | 0.3530                                      | 1.0000        | 0.7622         | 1.0000        | 0.5058        | 1.0000        |
| miR-328    | 0.2808                                       | 1.0000        | <b>0.0412</b>  | 0.8660   | 0.6813        | 1.0000        | <b>0.0297</b>                               | 0.6237        | <b>0.0063</b>  | 0.1313        | 0.3817        | 1.0000        |
| miR-330-3p | 0.7985                                       | 1.0000        | 0.4135         | 1.0000   | 0.1421        | 1.0000        | 0.2408                                      | 1.0000        | 0.1854         | 1.0000        | 0.0385        | 0.8080        |
| miR-331-3p | 0.4632                                       | 1.0000        | 0.1316         | 1.0000   | 0.2254        | 1.0000        | 0.1818                                      | 1.0000        | <b>0.0079</b>  | 0.1660        | 0.2295        | 1.0000        |
| miR-342-3p | 0.9910                                       | 1.0000        | 0.6203         | 1.0000   | 0.0506        | 1.0000        | 0.3755                                      | 1.0000        | 0.2051         | 1.0000        | <b>0.0091</b> | 0.1918        |
| miR-346    | 0.3117                                       | 1.0000        | 0.9070         | 1.0000   | 0.1065        | 1.0000        | 0.7335                                      | 1.0000        | 0.6812         | 1.0000        | 0.0459        | 0.9633        |
| miR-370    | 0.1408                                       | 1.0000        | <b>0.0394</b>  | 0.8283   | 0.4970        | 1.0000        | <b>0.0016</b>                               | <b>0.0336</b> | <b>0.0021</b>  | <b>0.0443</b> | 0.1994        | 1.0000        |
| miR-501-5p | 0.9108                                       | 1.0000        | 0.9771         | 1.0000   | 0.5613        | 1.0000        | 0.5613                                      | 1.0000        | 0.4368         | 1.0000        | 0.8184        | 1.0000        |
| miR-98     | 0.6214                                       | 1.0000        | 0.3507         | 1.0000   | 0.7371        | 1.0000        | 0.5212                                      | 1.0000        | 0.2819         | 1.0000        | 0.7746        | 1.0000        |

| B          | Cerebellum                                   |          |                |          |               |          | Cerebellum                                  |          |                |          |              |          |
|------------|----------------------------------------------|----------|----------------|----------|---------------|----------|---------------------------------------------|----------|----------------|----------|--------------|----------|
|            | Plaque Score Continuous Independent Variable |          |                |          |               |          | Braak Stage Continuous Independent Variable |          |                |          |              |          |
|            | Linear Reg. 41-CT                            | Adjusted | Spearman 41-CT | Adjusted | Spearman ΔCT  | Adjusted | Linear Reg. 41-CT                           | Adjusted | Spearman 41-CT | Adjusted | Spearman ΔCT | Adjusted |
| MiRNA Name | p-value                                      | p-value  | p-value        | p-value  | p-value       | p-value  | p-value                                     | p-value  | p-value        | p-value  | p-value      | p-value  |
| miR-126    | 0.5811                                       | 1.0000   | 0.8718         | 1.0000   | 0.3202        | 1.0000   | 0.6046                                      | 1.0000   | 0.9419         | 1.0000   | 0.6632       | 1.0000   |
| miR-132    | 0.6870                                       | 1.0000   | 0.4099         | 1.0000   | 0.8009        | 1.0000   | 0.1835                                      | 1.0000   | 0.1772         | 1.0000   | 0.7574       | 1.0000   |
| miR-138    | 0.6818                                       | 1.0000   | 0.6653         | 1.0000   | <b>0.0091</b> | 0.1919   | 0.6929                                      | 1.0000   | 0.8668         | 1.0000   | 0.0499       | 1.0000   |
| miR-139-5p | 0.4707                                       | 1.0000   | 0.6312         | 1.0000   | 0.6568        | 1.0000   | 0.4091                                      | 1.0000   | 0.3849         | 1.0000   | 0.9569       | 1.0000   |
| miR-149    | 0.4970                                       | 1.0000   | 0.5602         | 1.0000   | 0.6031        | 1.0000   | 0.2712                                      | 1.0000   | 0.3773         | 1.0000   | 0.4785       | 1.0000   |
| miR-152    | 0.2902                                       | 1.0000   | 0.5403         | 1.0000   | 0.0638        | 1.0000   | 0.7220                                      | 1.0000   | 0.8413         | 1.0000   | 0.3119       | 1.0000   |
| miR-15a    | 0.7261                                       | 1.0000   | <b>0.0275</b>  | 0.5776   | 0.1677        | 1.0000   | 0.0708                                      | 1.0000   | <b>0.0204</b>  | 0.4288   | 0.1110       | 1.0000   |
| miR-181c   | 0.7463                                       | 1.0000   | 0.8915         | 1.0000   | 0.1991        | 1.0000   | 0.5712                                      | 1.0000   | 0.5370         | 1.0000   | 0.4256       | 1.0000   |
| miR-184    | 0.9346                                       | 1.0000   | 0.9907         | 1.0000   | 0.0468        | 0.9835   | 0.7254                                      | 1.0000   | 0.6658         | 1.0000   | 0.0929       | 1.0000   |
| miR-191    | 0.8218                                       | 1.0000   | 0.5374         | 1.0000   | 0.2869        | 1.0000   | 0.6131                                      | 1.0000   | 0.5136         | 1.0000   | 0.3309       | 1.0000   |
| miR-204    | 0.2713                                       | 1.0000   | 0.2722         | 1.0000   | 0.4439        | 1.0000   | 0.1896                                      | 1.0000   | 0.3515         | 1.0000   | 0.6727       | 1.0000   |
| miR-208b   | 0.8770                                       | 1.0000   | 0.8696         | 1.0000   | 0.2427        | 1.0000   | 0.6022                                      | 1.0000   | 0.4682         | 1.0000   | 0.0989       | 1.0000   |
| miR-211    | 0.1271                                       | 1.0000   | 0.0386         | 0.8111   | 0.0737        | 1.0000   | 0.2006                                      | 1.0000   | <b>0.0204</b>  | 0.4288   | 0.1025       | 1.0000   |
| miR-328    | 0.7513                                       | 1.0000   | 0.7540         | 1.0000   | 0.0559        | 1.0000   | 0.7451                                      | 1.0000   | 0.7158         | 1.0000   | 0.0736       | 1.0000   |
| miR-330-3p | 0.7960                                       | 1.0000   | 0.9079         | 1.0000   | <b>0.0297</b> | 0.6247   | 0.5251                                      | 1.0000   | 0.4877         | 1.0000   | 0.1561       | 1.0000   |
| miR-331-3p | 0.5659                                       | 1.0000   | 0.1506         | 1.0000   | 0.7025        | 1.0000   | 0.1806                                      | 1.0000   | 0.0618         | 1.0000   | 0.7698       | 1.0000   |
| miR-342-3p | 0.9759                                       | 1.0000   | 0.7653         | 1.0000   | 0.5346        | 1.0000   | 0.5710                                      | 1.0000   | 0.6536         | 1.0000   | 0.3782       | 1.0000   |
| miR-346    | 0.1544                                       | 1.0000   | 0.1117         | 1.0000   | 0.2670        | 1.0000   | 0.5294                                      | 1.0000   | 0.4641         | 1.0000   | 0.7863       | 1.0000   |
| miR-370    | 0.4605                                       | 1.0000   | 0.0438         | 0.9201   | 0.7625        | 1.0000   | 0.2849                                      | 1.0000   | <b>0.0379</b>  | 0.7969   | 0.5821       | 1.0000   |
| miR-501-5p | 0.6604                                       | 1.0000   | 0.7816         | 1.0000   | 0.7536        | 1.0000   | 0.5969                                      | 1.0000   | 0.4664         | 1.0000   | 0.9327       | 1.0000   |
| miR-98     | 0.6260                                       | 1.0000   | 0.3976         | 1.0000   | 0.2503        | 1.0000   | 0.5830                                      | 1.0000   | 0.2413         | 1.0000   | 0.2459       | 1.0000   |

**Supplemental Table 5.** Linear regression and Spearman correlation results summary.  
Spearman correlation results for phase II qRT-PCR results of 21 miRNA chosen for validation.  
AD (n=21) and control (n=21) subjects qRT-PCR 41-CT values and  $\Delta$ CT values were utilized for this analysis.

Linear regression and spearman correlation p-values for each miRNA 41-CT and  $\Delta$ CT values for hippocampus (Panel A) or cerebellum (Panel B) for the continuous variables; plaque score or Braak stage.

Significant p-values are in **bold** and are without correction for multiple comparisons. Adjusted p-values take into account multiple comparisons across 21 miRNA using a Bonferroni method where p-values are adjusted (multiplied) according to the number of comparisons and  $p < 0.002 (=0.05 / 21)$  is the unadjusted p-value that indicates significance. All adjusted p-values  $> 1.000$ . are set at 1.0000.

Supplemental Table 6.

| ID  | Sample Variables |           |               |        |           |        |      |             |            |        |
|-----|------------------|-----------|---------------|--------|-----------|--------|------|-------------|------------|--------|
|     | Tissue           | Diagnosis | DiseaseStatus | TapAge | Onset Age | Gender | PMI  | PlaqueScore | BRAAKStage | APOEe4 |
| 552 | CB               | AD        | AD            |        | 53        | M      | 4.00 | FREQ        | VI         | e4+    |
| 581 | CB               | AD        | AD            |        | 71        | M      | 8.00 | FREQ        | VI         | e4+    |
| 627 | CB               | AD        | AD            |        | 69        | M      | 3.45 | FREQ        | V          | e4+    |
| 510 | CB               | CNTL      | CNTRL         |        | .         | F      | 6.00 | ABSENT      | III        | e4-    |
| 537 | CB               | CNTL      | CNTRL         |        | .         | F      | 3.30 | SPARSE      | III        | e4-    |
| 565 | CB               | CNTL      | CNTRL         |        | .         | F      | 5.30 | SPARSE      | III        | e4+    |
| 508 | CB               | FTD       | Other         |        | 60        | M      | 9.30 | ABSENT      | 0          | e4-    |
| 661 | CB               | AD-LBV    | Other         |        | 53        | M      | 4.30 | FREQ        | IV         | e4-    |
| 748 | CB               | PDD       | Other         |        | 85        | M      | 3.15 | SPARSE      | II         | e4-    |
| 366 | CB               | FTD       | Other         |        | 52        | M      | 3.00 | SPARSE      | II         | e4+    |
| 685 | CB               | AD-LBV    | Other         |        | 64        | F      | 4.10 | FREQ        | V          | e4+    |
| 693 | CB               | DLB       | Other         |        | 64        | M      | 3.00 | FREQ        | III        | e4+    |
| 552 | CSF              | AD        | AD            | 59     | 53        | M      | 4.00 | FREQ        | VI         | e4+    |
| 581 | CSF              | AD        | AD            | 85     | 71        | M      | 8.00 | FREQ        | VI         | e4+    |
| 627 | CSF              | AD        | AD            | 72     | 69        | M      | 3.45 | FREQ        | V          | e4+    |
| 510 | CSF              | CNTL      | CNTRL         | 77     | .         | F      | 6.00 | ABSENT      | III        | e4-    |
| 537 | CSF              | CNTL      | CNTRL         | 102    | .         | F      | 3.30 | SPARSE      | III        | e4-    |
| 565 | CSF              | CNTL      | CNTRL         | 79     | .         | F      | 5.30 | SPARSE      | III        | e4+    |
| 508 | CSF              | FTD       | Other         | 67     | 60        | M      | 9.30 | ABSENT      | 0          | e4-    |
| 661 | CSF              | AD-LBV    | Other         | 60     | 53        | M      | 4.30 | FREQ        | IV         | e4-    |
| 748 | CSF              | PDD       | Other         | 90     | 85        | M      | 3.15 | SPARSE      | II         | e4-    |
| 366 | CSF              | FTD       | Other         | 56     | 52        | M      | 3.00 | SPARSE      | II         | e4+    |
| 685 | CSF              | AD-LBV    | Other         | 68     | 64        | F      | 4.10 | FREQ        | V          | e4+    |
| 693 | CSF              | DLB       | Other         | 74     | 64        | M      | 3.00 | FREQ        | III        | e4+    |
| 552 | HP               | AD        | AD            |        | 53        | M      | 4.00 | FREQ        | VI         | e4+    |
| 581 | HP               | AD        | AD            |        | 71        | M      | 8.00 | FREQ        | VI         | e4+    |
| 627 | HP               | AD        | AD            |        | 69        | M      | 3.45 | FREQ        | V          | e4+    |
| 510 | HP               | CNTL      | CNTRL         |        | .         | F      | 6.00 | ABSENT      | III        | e4-    |
| 537 | HP               | CNTL      | CNTRL         |        | .         | F      | 3.30 | SPARSE      | III        | e4-    |
| 565 | HP               | CNTL      | CNTRL         |        | .         | F      | 5.30 | SPARSE      | III        | e4+    |
| 508 | HP               | FTD       | Other         |        | 60        | M      | 9.30 | ABSENT      | 0          | e4-    |
| 661 | HP               | AD-LBV    | Other         |        | 53        | M      | 4.30 | FREQ        | IV         | e4-    |
| 748 | HP               | PDD       | Other         |        | 85        | M      | 3.15 | SPARSE      | II         | e4-    |
| 366 | HP               | FTD       | Other         |        | 52        | M      | 3.00 | SPARSE      | II         | e4+    |
| 685 | HP               | AD-LBV    | Other         |        | 64        | F      | 4.10 | FREQ        | V          | e4+    |
| 693 | HP               | DLB       | Other         |        | 64        | M      | 3.00 | FREQ        | III        | e4+    |
| 552 | PLASMA           | AD        | AD            | 59     | 53        | M      | 4.00 | FREQ        | VI         | e4+    |
| 581 | PLASMA           | AD        | AD            | 85     | 71        | M      | 8.00 | FREQ        | VI         | e4+    |
| 627 | PLASMA           | AD        | AD            | 72     | 69        | M      | 3.45 | FREQ        | V          | e4+    |
| 510 | PLASMA           | CNTL      | CNTRL         | 77     | .         | F      | 6.00 | ABSENT      | III        | e4-    |
| 537 | PLASMA           | CNTL      | CNTRL         | 102    | .         | F      | 3.30 | SPARSE      | III        | e4-    |
| 565 | PLASMA           | CNTL      | CNTRL         | 79     | .         | F      | 5.30 | SPARSE      | III        | e4+    |
| 508 | PLASMA           | FTD       | Other         | 67     | 60        | M      | 9.30 | ABSENT      | 0          | e4-    |
| 661 | PLASMA           | AD-LBV    | Other         | 60     | 53        | M      | 4.30 | FREQ        | IV         | e4-    |

Supplemental Table 6.

| ID  | Sample Variables |           |               |        |           |        |      |             |            |        |
|-----|------------------|-----------|---------------|--------|-----------|--------|------|-------------|------------|--------|
|     | Tissue           | Diagnosis | DiseaseStatus | TapAge | Onset Age | Gender | PMI  | PlaqueScore | BRAAKStage | APOEe4 |
| 748 | PLASMA           | PDD       | Other         | 90     | 85        | M      | 3.15 | SPARSE      | II         | e4-    |
| 366 | PLASMA           | FTD       | Other         | 56     | 52        | M      | 3.00 | SPARSE      | II         | e4+    |
| 685 | PLASMA           | AD-LBV    | Other         | 68     | 64        | F      | 4.10 | FREQ        | V          | e4+    |
| 693 | PLASMA           | DLB       | Other         | 74     | 64        | M      | 3.00 | FREQ        | III        | e4+    |

Supplemental Table 6.

| ID  | Raw CT Replicate Means |               |               |               |               | 41-CT Replicate Means |               |               |               |               |
|-----|------------------------|---------------|---------------|---------------|---------------|-----------------------|---------------|---------------|---------------|---------------|
|     | miR-370MeanCT          | miR-328MeanCT | miR-138MeanCT | miR-132MeanCT | miR-15aMeanCT | miR-370 41-CT         | miR-328 41-CT | miR-138 41-CT | miR-132 41-CT | miR-15a 41-CT |
| 552 | 21.20                  | 21.17         | 22.97         | 24.72         | 26.38         | 19.80                 | 19.83         | 18.03         | 16.28         | 14.62         |
| 581 | 21.24                  | 21.20         | 22.39         | 22.46         | 25.89         | 19.76                 | 19.80         | 18.61         | 18.54         | 15.11         |
| 627 | 22.24                  | 20.92         | 22.37         | 24.42         | 26.92         | 18.76                 | 20.08         | 18.63         | 16.58         | 14.08         |
| 510 | 20.94                  | 20.85         | 22.81         | 22.83         | 28.22         | 20.06                 | 20.15         | 18.19         | 18.17         | 12.78         |
| 537 | 20.66                  | 20.84         | 23.07         | 23.28         | 28.18         | 20.34                 | 20.16         | 17.93         | 17.72         | 12.82         |
| 565 | 21.39                  | 20.91         | 22.43         | 23.87         | 25.68         | 19.61                 | 20.09         | 18.57         | 17.13         | 15.32         |
| 508 | 21.10                  | 19.99         | 22.37         | 23.73         | 28.15         | 19.90                 | 21.01         | 18.63         | 17.27         | 12.85         |
| 661 | 21.58                  | 21.91         | 23.45         | 26.22         | 27.94         | 19.42                 | 19.09         | 17.55         | 14.78         | 13.06         |
| 748 | 22.35                  | 20.69         | 22.79         | 25.25         | 22.45         | 18.65                 | 20.31         | 18.21         | 15.75         | 18.55         |
| 366 | 21.00                  | 20.71         | 23.56         | 22.18         | 24.09         | 20.00                 | 20.29         | 17.44         | 18.82         | 16.91         |
| 685 | 22.64                  | 20.69         | 23.72         | 24.77         | 26.88         | 18.36                 | 20.31         | 17.28         | 16.23         | 14.12         |
| 693 | 22.01                  | 20.99         | 22.98         | 24.79         | 28.33         | 18.99                 | 20.01         | 18.02         | 16.21         | 12.67         |
| 552 | 40.00                  | 25.28         | 40.00         | 20.37         | 30.18         | 1.00                  | 15.72         | 1.00          | 20.63         | 10.82         |
| 581 | 40.00                  | 25.71         | 40.00         | 27.64         | 34.06         | 1.00                  | 15.29         | 1.00          | 13.36         | 6.94          |
| 627 | 40.00                  | 35.68         | 40.00         | 18.92         | 29.84         | 1.00                  | 5.32          | 1.00          | 22.08         | 11.16         |
| 510 | 40.00                  | 30.07         | 40.00         | 33.89         | 32.52         | 1.00                  | 10.93         | 1.00          | 7.11          | 8.48          |
| 537 | 40.00                  | 33.36         | 40.00         | 22.95         | 33.34         | 1.00                  | 7.64          | 1.00          | 18.05         | 7.66          |
| 565 | 40.00                  | 27.54         | 40.00         | 26.13         | 31.22         | 1.00                  | 13.46         | 1.00          | 14.87         | 9.78          |
| 508 | 40.00                  | 33.71         | 40.00         | 27.14         | 33.31         | 1.00                  | 7.29          | 1.00          | 13.86         | 7.69          |
| 661 | 40.00                  | 27.83         | 40.00         | 21.22         | 32.62         | 1.00                  | 13.17         | 1.00          | 19.78         | 8.38          |
| 748 | 40.00                  | 28.19         | 40.00         | 20.78         | 31.43         | 1.00                  | 12.81         | 1.00          | 20.22         | 9.57          |
| 366 | 40.00                  | 26.35         | 40.00         | 40.00         | 32.05         | 1.00                  | 14.65         | 1.00          | 1.00          | 8.95          |
| 685 | 40.00                  | 30.80         | 40.00         | 33.33         | 33.08         | 1.00                  | 10.20         | 1.00          | 7.67          | 7.92          |
| 693 | 40.00                  | 25.11         | 40.00         | 20.73         | 30.18         | 1.00                  | 15.89         | 1.00          | 20.27         | 10.82         |
| 552 | 32.60                  | 24.59         | 28.27         | 32.78         | 26.00         | 8.40                  | 16.41         | 12.73         | 8.22          | 15.00         |
| 581 | 22.08                  | 21.15         | 21.73         | 23.03         | 26.22         | 18.92                 | 19.85         | 19.27         | 17.97         | 14.78         |
| 627 | 21.44                  | 21.22         | 20.59         | 22.41         | 24.43         | 19.56                 | 19.78         | 20.41         | 18.59         | 16.57         |
| 510 | 20.84                  | 21.40         | 22.42         | 22.61         | 28.30         | 20.16                 | 19.60         | 18.58         | 18.39         | 12.70         |
| 537 | 20.16                  | 20.35         | 20.77         | 22.97         | 26.80         | 20.84                 | 20.65         | 20.23         | 18.03         | 14.20         |
| 565 | 20.78                  | 20.13         | 20.95         | 22.75         | 24.12         | 20.22                 | 20.87         | 20.05         | 18.25         | 16.88         |
| 508 | 20.43                  | 21.83         | 21.02         | 22.61         | 30.09         | 20.57                 | 19.17         | 19.98         | 18.39         | 10.91         |
| 661 | 20.88                  | 19.11         | 20.25         | 22.15         | 27.60         | 20.12                 | 21.89         | 20.75         | 18.85         | 13.40         |
| 748 | 22.18                  | 21.62         | 22.43         | 23.63         | 26.03         | 18.82                 | 19.38         | 18.57         | 17.37         | 14.97         |
| 366 | 20.57                  | 21.34         | 21.56         | 21.95         | 31.25         | 20.43                 | 19.66         | 19.44         | 19.05         | 9.75          |
| 685 | 20.97                  | 21.76         | 21.36         | 23.38         | 27.73         | 20.03                 | 19.24         | 19.64         | 17.62         | 13.27         |
| 693 | 20.59                  | 20.84         | 20.79         | 23.53         | 24.53         | 20.41                 | 20.16         | 20.21         | 17.47         | 16.47         |
| 552 | 40.00                  | 27.13         | 40.00         | 19.73         | 29.52         | 1.00                  | 13.87         | 1.00          | 21.27         | 11.48         |
| 581 | 40.00                  | 24.74         | 40.00         | 25.87         | 29.24         | 1.00                  | 16.26         | 1.00          | 15.13         | 11.76         |
| 627 | 40.00                  | 32.38         | 40.00         | 19.03         | 29.54         | 1.00                  | 8.62          | 1.00          | 21.97         | 11.46         |
| 510 | 40.00                  | 26.65         | 40.00         | 19.37         | 32.59         | 1.00                  | 14.35         | 1.00          | 21.63         | 8.41          |
| 537 | 40.00                  | 26.66         | 40.00         | 19.94         | 28.50         | 1.00                  | 14.34         | 1.00          | 21.06         | 12.50         |
| 565 | 40.00                  | 27.72         | 40.00         | 33.15         | 30.88         | 1.00                  | 13.28         | 1.00          | 7.85          | 10.12         |
| 508 | 40.00                  | 26.76         | 40.00         | 14.96         | 31.92         | 1.00                  | 14.24         | 1.00          | 26.04         | 9.08          |
| 661 | 40.00                  | 30.31         | 40.00         | 21.93         | 29.87         | 1.00                  | 10.69         | 1.00          | 19.07         | 11.13         |

Supplemental Table 6.

| ID  | Raw CT Replicate Means |               |               |               |               | 41-CT Replicate Means |               |               |               |               |
|-----|------------------------|---------------|---------------|---------------|---------------|-----------------------|---------------|---------------|---------------|---------------|
|     | miR-370MeanCT          | miR-328MeanCT | miR-138MeanCT | miR-132MeanCT | miR-15aMeanCT | miR-370_41-CT         | miR-328_41-CT | miR-138_41-CT | miR-132_41-CT | miR-15a_41-CT |
| 748 | 40.00                  | 27.35         | 40.00         | 19.61         | 32.04         | 1.00                  | 13.65         | 1.00          | 21.39         | 8.96          |
| 366 | 40.00                  | 27.03         | 40.00         | 26.88         | 31.62         | 1.00                  | 13.97         | 1.00          | 14.12         | 9.38          |
| 685 | 40.00                  | 26.05         | 40.00         | 27.04         | 31.02         | 1.00                  | 14.95         | 1.00          | 13.96         | 9.98          |
| 693 | 40.00                  | 36.66         | 40.00         | 17.55         | 29.50         | 1.00                  | 4.34          | 1.00          | 23.45         | 11.50         |

Supplemental Table 6.

| ID  | $\Delta\text{CT} = (\text{Mean Raw CT miRNA}) - (\text{Mean Raw CT mean miR-132})$ |                           |                           |                           |                           |
|-----|------------------------------------------------------------------------------------|---------------------------|---------------------------|---------------------------|---------------------------|
|     | miR-370 $\Delta\text{CT}$                                                          | miR-328 $\Delta\text{CT}$ | miR-138 $\Delta\text{CT}$ | miR-132 $\Delta\text{CT}$ | miR-15a $\Delta\text{CT}$ |
| 552 | -3.52                                                                              | -3.55                     | -1.75                     | 0.00                      | 1.66                      |
| 581 | -1.22                                                                              | -1.26                     | -0.07                     | 0.00                      | 3.43                      |
| 627 | -2.18                                                                              | -3.50                     | -2.05                     | 0.00                      | 2.50                      |
| 510 | -1.89                                                                              | -1.98                     | -0.02                     | 0.00                      | 5.39                      |
| 537 | -2.61                                                                              | -2.44                     | -0.20                     | 0.00                      | 4.90                      |
| 565 | -2.48                                                                              | -2.96                     | -1.44                     | 0.00                      | 1.81                      |
| 508 | -2.63                                                                              | -3.74                     | -1.36                     | 0.00                      | 4.42                      |
| 661 | -4.64                                                                              | -4.31                     | -2.78                     | 0.00                      | 1.72                      |
| 748 | -2.90                                                                              | -4.56                     | -2.46                     | 0.00                      | -2.80                     |
| 366 | -1.18                                                                              | -1.48                     | 1.38                      | 0.00                      | 1.91                      |
| 685 | -2.13                                                                              | -4.08                     | -1.04                     | 0.00                      | 2.11                      |
| 693 | -2.78                                                                              | -3.79                     | -1.80                     | 0.00                      | 3.55                      |
| 552 | 19.63                                                                              | 4.91                      | 19.63                     | 0.00                      | 9.81                      |
| 581 | 12.36                                                                              | -1.93                     | 12.36                     | 0.00                      | 6.42                      |
| 627 | 21.08                                                                              | 16.77                     | 21.08                     | 0.00                      | 10.92                     |
| 510 | 6.11                                                                               | -3.82                     | 6.11                      | 0.00                      | -1.36                     |
| 537 | 17.05                                                                              | 10.41                     | 17.05                     | 0.00                      | 10.39                     |
| 565 | 13.87                                                                              | 1.40                      | 13.87                     | 0.00                      | 5.09                      |
| 508 | 12.86                                                                              | 6.56                      | 12.86                     | 0.00                      | 6.17                      |
| 661 | 18.78                                                                              | 6.60                      | 18.78                     | 0.00                      | 11.40                     |
| 748 | 19.22                                                                              | 7.42                      | 19.22                     | 0.00                      | 10.66                     |
| 366 | 0.00                                                                               | -13.65                    | 0.00                      | 0.00                      | -7.95                     |
| 685 | 6.67                                                                               | -2.53                     | 6.67                      | 0.00                      | -0.25                     |
| 693 | 19.27                                                                              | 4.38                      | 19.27                     | 0.00                      | 9.44                      |
| 552 | -0.18                                                                              | -8.19                     | -4.51                     | 0.00                      | -6.79                     |
| 581 | -0.94                                                                              | -1.88                     | -1.30                     | 0.00                      | 3.19                      |
| 627 | -0.97                                                                              | -1.19                     | -1.82                     | 0.00                      | 2.02                      |
| 510 | -1.77                                                                              | -1.21                     | -0.19                     | 0.00                      | 5.69                      |
| 537 | -2.81                                                                              | -2.63                     | -2.20                     | 0.00                      | 3.83                      |
| 565 | -1.98                                                                              | -2.62                     | -1.81                     | 0.00                      | 1.36                      |
| 508 | -2.18                                                                              | -0.78                     | -1.59                     | 0.00                      | 7.49                      |
| 661 | -1.27                                                                              | -3.04                     | -1.90                     | 0.00                      | 5.45                      |
| 748 | -1.45                                                                              | -2.00                     | -1.20                     | 0.00                      | 2.40                      |
| 366 | -1.38                                                                              | -0.61                     | -0.40                     | 0.00                      | 9.30                      |
| 685 | -2.40                                                                              | -1.61                     | -2.02                     | 0.00                      | 4.35                      |
| 693 | -2.93                                                                              | -2.68                     | -2.74                     | 0.00                      | 1.00                      |
| 552 | 20.27                                                                              | 7.40                      | 20.27                     | 0.00                      | 9.79                      |
| 581 | 14.13                                                                              | -1.13                     | 14.13                     | 0.00                      | 3.36                      |
| 627 | 20.97                                                                              | 13.36                     | 20.97                     | 0.00                      | 10.52                     |
| 510 | 20.63                                                                              | 7.28                      | 20.63                     | 0.00                      | 13.23                     |
| 537 | 20.06                                                                              | 6.72                      | 20.06                     | 0.00                      | 8.56                      |
| 565 | 6.85                                                                               | -5.43                     | 6.85                      | 0.00                      | -2.26                     |
| 508 | 25.04                                                                              | 11.80                     | 25.04                     | 0.00                      | 16.96                     |
| 661 | 18.07                                                                              | 8.39                      | 18.07                     | 0.00                      | 7.94                      |

**Supplemental Table 6.** Phase III independent sample population qRT-PCR results for AD (n=3), control (n=3) and other neurodegenerative disease (n=6) cerebellum (CB), hippocampus (HP), cerebrospinal fluid (CSF) and plasma.

Five miRNA found positive in phase II were selected for further validation in this phase III independent replication sample. Q RT-PCR assay replicate mean results are shown here for CT and 41-CT values.  $\Delta\text{CT}$  values are CT values normalized to miR-132.



Supplemental Table 6.

| ID  | $\Delta CT = (\text{Mean Raw CT miRNA}) - (\text{Mean Raw CT mean miR-132})$ |                     |                     |                     |                     |
|-----|------------------------------------------------------------------------------|---------------------|---------------------|---------------------|---------------------|
|     | miR-370 $\Delta CT$                                                          | miR-328 $\Delta CT$ | miR-138 $\Delta CT$ | miR-132 $\Delta CT$ | miR-15a $\Delta CT$ |
| 748 | 20.39                                                                        | 7.74                | 20.39               | 0.00                | 12.43               |
| 366 | 13.12                                                                        | 0.15                | 13.12               | 0.00                | 4.75                |
| 685 | 12.96                                                                        | -0.99               | 12.96               | 0.00                | 3.97                |
| 693 | 22.45                                                                        | 19.11               | 22.45               | 0.00                | 11.95               |

Supplemental Table 7.

| A          | Hippocampus                      |          |                |          |                      |          | Hippocampus                     |          |                |          |                      |          |
|------------|----------------------------------|----------|----------------|----------|----------------------|----------|---------------------------------|----------|----------------|----------|----------------------|----------|
|            | Plaque Score Continuous Variable |          |                |          |                      |          | Braak Stage Continuous Variable |          |                |          |                      |          |
|            | Linear Reg. 41-CT                | Adjusted | Spearman 41-CT | Adjusted | Spearman $\Delta$ CT | Adjusted | Linear Reg. 41-CT               | Adjusted | Spearman 41-CT | Adjusted | Spearman $\Delta$ CT | Adjusted |
| MIRNA Name | p-value                          | p-value  | p-value        | p-value  | p-value              | p-value  | p-value                         | p-value  | p-value        | p-value  | p-value              | p-value  |
| miR-132    | 0.3468                           | 1.7339   | 0.3737         | 1.8687   |                      |          | 0.1413                          | 0.7067   | 0.3546         | 1.7728   |                      |          |
| miR-138    | 0.7120                           | 3.5599   | 0.4893         | 2.4463   | 0.6209               | 1.0000   | 0.2190                          | 1.0950   | 0.9560         | 4.7799   | 0.1308               | 0.5233   |
| miR-15a    | 0.0928                           | 0.4641   | 0.1417         | 0.7087   | 0.5233               | 1.0000   | 0.1199                          | 0.5996   | 0.2100         | 1.0500   | 0.1210               | 0.4838   |
| miR-328    | 0.9268                           | 4.6342   | 0.5852         | 2.9259   | 0.5984               | 1.0000   | 0.4508                          | 2.2538   | 0.8771         | 4.3856   | 0.1923               | 0.7691   |
| miR-370    | 0.3034                           | 1.5170   | 0.0735         | 0.3674   | 0.9276               | 1.0000   | 0.0916                          | 0.4582   | 0.0270         | 0.1350   | 0.0890               | 0.3559   |

  

| B          | Cerebellum                       |          |                |          |                      |          | Cerebellum                      |          |                |               |                      |          |
|------------|----------------------------------|----------|----------------|----------|----------------------|----------|---------------------------------|----------|----------------|---------------|----------------------|----------|
|            | Plaque Score Continuous Variable |          |                |          |                      |          | Braak Stage Continuous Variable |          |                |               |                      |          |
|            | Linear Reg. 41-CT                | Adjusted | Spearman 41-CT | Adjusted | Spearman $\Delta$ CT | Adjusted | Linear Reg. 41-CT               | Adjusted | Spearman 41-CT | Adjusted      | Spearman $\Delta$ CT | Adjusted |
| MIRNA Name | p-value                          | p-value  | p-value        | p-value  | p-value              | p-value  | p-value                         | p-value  | p-value        | p-value       | p-value              | p-value  |
| miR-132    | 0.1426                           | 0.7131   | 0.1343         | 0.6714   |                      |          | 0.6690                          | 1.0000   | 0.6981         | 1.0000        |                      |          |
| miR-138    | 0.4131                           | 1.0000   | 0.4296         | 1.0000   | 0.9063               | 1.0000   | 0.7882                          | 1.0000   | 0.8164         | 1.0000        | 0.7398               | 1.0000   |
| miR-15a    | 0.9398                           | 1.0000   | 0.8876         | 1.0000   | 0.1271               | 0.5084   | 0.8770                          | 1.0000   | 0.9736         | 1.0000        | 0.6330               | 1.0000   |
| miR-328    | <b>0.0250</b>                    | 0.1248   | <b>0.0167</b>  | 0.0837   | 0.8690               | 1.0000   | <b>0.0285</b>                   | 0.1423   | <b>0.0094</b>  | <b>0.0468</b> | 0.7147               | 1.0000   |
| miR-370    | 0.0931                           | 0.4656   | <b>0.0480</b>  | 0.2399   | 0.9624               | 1.0000   | 0.4797                          | 1.0000   | 0.4188         | 1.0000        | 0.9472               | 1.0000   |

  

| C          | Cerebrospinal Fluid              |          |                |          |                      |          | Cerebrospinal Fluid             |          |                |          |                      |          |
|------------|----------------------------------|----------|----------------|----------|----------------------|----------|---------------------------------|----------|----------------|----------|----------------------|----------|
|            | Plaque Score Continuous Variable |          |                |          |                      |          | Braak Stage Continuous Variable |          |                |          |                      |          |
|            | Linear Reg. 41-CT                | Adjusted | Spearman 41-CT | Adjusted | Spearman $\Delta$ CT | Adjusted | Linear Reg. 41-CT               | Adjusted | Spearman 41-CT | Adjusted | Spearman $\Delta$ CT | Adjusted |
| MIRNA Name | p-value                          | p-value  | p-value        | p-value  | p-value              | p-value  | p-value                         | p-value  | p-value        | p-value  | p-value              | p-value  |
| miR-132    | 0.1881                           | 0.5644   | 0.1135         | 0.3404   |                      |          | 0.4865                          | 1.0000   | 0.3733         | 1.0000   |                      |          |
| miR-138    |                                  |          |                |          |                      |          |                                 |          |                |          |                      |          |
| miR-15a    | 0.3147                           | 0.9442   | 0.4442         | 1.0000   | 0.7410               | 1.0000   | 0.6405                          | 1.0000   | 0.8946         | 1.0000   | 0.4121               | 0.8242   |
| miR-328    | 0.3056                           | 0.9168   | 0.2414         | 0.7242   | 0.6877               | 1.0000   | 0.4565                          | 1.0000   | 0.4811         | 1.0000   | 0.9736               | 1.0000   |
| miR-370    |                                  |          |                |          |                      |          |                                 |          |                |          |                      |          |

  

| D          | Plasma                           |               |                |          |                      |          | Plasma                          |          |                |          |                      |          |
|------------|----------------------------------|---------------|----------------|----------|----------------------|----------|---------------------------------|----------|----------------|----------|----------------------|----------|
|            | Plaque Score Continuous Variable |               |                |          |                      |          | Braak Stage Continuous Variable |          |                |          |                      |          |
|            | Linear Reg. 41-CT                | Adjusted      | Spearman 41-CT | Adjusted | Spearman $\Delta$ CT | Adjusted | Linear Reg. 41-CT               | Adjusted | Spearman 41-CT | Adjusted | Spearman $\Delta$ CT | Adjusted |
| MIRNA Name | p-value                          | p-value       | p-value        | p-value  | p-value              | p-value  | p-value                         | p-value  | p-value        | p-value  | p-value              | p-value  |
| miR-132    | 0.5473                           | 1.0000        | 0.5687         | 1.0000   |                      |          | 0.3985                          | 1.0000   | 0.3860         | 1.0000   |                      |          |
| miR-138    |                                  |               |                |          |                      |          |                                 |          |                |          |                      |          |
| miR-15a*   | <b>0.0118</b>                    | <b>0.0353</b> | <b>0.0294</b>  | 0.0883   | 0.1008               | 0.2017   | 0.0446                          | 0.1337   | 0.0517         | 0.1550   | 0.1377               | 0.2754   |
| miR-328    | 0.2247                           | 0.6740        | 0.4012         | 1.0000   | 0.2014               | 0.4027   | 0.9408                          | 1.0000   | 0.6981         | 1.0000   | 0.5549               | 1.0000   |
| miR-370    |                                  |               |                |          |                      |          |                                 |          |                |          |                      |          |

\* Linear regression for  $\Delta$ CT; p-value, 0.0350.

Supplemental Table 7.

**Supplemental Table 7.** Linear regression and Spearman correlation results summary. Spearman correlation results for phase III qRT-PCR results of 5 miRNA chosen for validation. AD (n=3), control (n=3) and other neurodegenerative disease (n=6) subjects qRT-PCR 41-CT  $\Delta$ CT values were utilized for this analysis.

Linear regression and/or spearman correlation p-values for miRNA 41-CT and  $\Delta$ CT values for hippocampus (Panel A), cerebellum (Panel B), cerebrospinal fluid (Panel C) and plasma (Panel D) for the continuous variables; plaque score or Braak stage.

Significant p-values are in bold and are without correction for multiple comparisons. Adjusted p-values take into account multiple comparisons across 5 or 3 miRNA using a Bonferroni method where p-values are adjusted (multiplied) according to the number of comparisons and  $p < 0.0100$  ( $= 0.05 / 5$ ) or  $p < 0.0167$  ( $= 0.05 / 3$ ) is the unadjusted p-value that indicates significance. All adjusted p-values  $> 1.0000$ . are set at 1.0000.

Supplemental Table 8

| Phase I |          | Raw CT   |       |       |          | 41-CT    |       |       |              | Relative Quantification Ratio = (41-CT) / (41-CT) |           |                 |  |
|---------|----------|----------|-------|-------|----------|----------|-------|-------|--------------|---------------------------------------------------|-----------|-----------------|--|
| MIRNA   | Cntrl CB | Cntrl HP | AD CB | AD HP | Cntrl CB | Cntrl HP | AD CB | AD HP | ADHP/CntrlHP | ADCB/CntrlCB                                      | ADHP/ADCB | CntrlHP/CntrlCB |  |
| miR-370 | 28.00    | 25.49    | 26.99 | 31.98 | 15.00    | 15.01    | 14.01 | 9.02  | 0.60         | 0.93                                              | 0.64      | 1.00            |  |
| miR-328 | 22.97    | 22.99    | 23.99 | 30.96 | 18.03    | 18.01    | 17.01 | 10.04 | 0.56         | 0.84                                              | 0.59      | 1.00            |  |
| miR-15a | 28.97    | 33.04    | 29.01 | 26.97 | 12.03    | 7.96     | 11.99 | 14.03 | 1.76         | 1.00                                              | 1.17      | 0.66            |  |
| miR-138 | 24.97    | 21.94    | 24.97 | 24.99 | 16.03    | 19.06    | 16.03 | 16.01 | 0.84         | 1.00                                              | 1.00      | 1.19            |  |
| miR-132 | 24.98    | 22.95    | 24.95 | 24.98 | 16.02    | 16.05    | 16.04 | 16.04 | 0.89         | 1.00                                              | 1.00      | 1.13            |  |

  

| Phase II |          | Mean Raw CT |       |       |          | Mean 41-CT |       |       |              | Relative Quantification Ratio = (Mean41-CT) / (Mean41-CT) |           |                 |  |
|----------|----------|-------------|-------|-------|----------|------------|-------|-------|--------------|-----------------------------------------------------------|-----------|-----------------|--|
| MIRNA    | Cntrl CB | Cntrl HP    | AD CB | AD HP | Cntrl CB | Cntrl HP   | AD CB | AD HP | ADHP/CntrlHP | ADCB/CntrlCB                                              | ADHP/ADCB | CntrlHP/CntrlCB |  |
| miR-370  | 22.63    | 21.54       | 22.89 | 22.11 | 18.37    | 19.46      | 18.11 | 18.89 | 0.970        | 0.986                                                     | 1.043     | 1.060           |  |
| miR-328  | 20.26    | 20.00       | 20.36 | 20.50 | 20.74    | 21.00      | 20.64 | 20.50 | 0.976        | 0.995                                                     | 0.993     | 1.012           |  |
| miR-15a  | 23.51    | 28.21       | 24.48 | 26.65 | 17.49    | 12.79      | 16.52 | 14.35 | 1.123        | 0.945                                                     | 0.869     | 0.731           |  |
| miR-138  | 21.17    | 19.23       | 21.05 | 20.02 | 19.83    | 21.77      | 19.95 | 20.98 | 0.964        | 1.006                                                     | 1.052     | 1.098           |  |
| miR-132  | 20.69    | 19.49       | 21.20 | 20.49 | 20.31    | 21.51      | 19.80 | 20.51 | 0.954        | 0.975                                                     | 1.036     | 1.059           |  |

  

| Phase III |          | Raw CT Replicate Means |       |       |          |          |           |        |           |              |           |              |
|-----------|----------|------------------------|-------|-------|----------|----------|-----------|--------|-----------|--------------|-----------|--------------|
| MIRNA     | Cntrl CB | Cntrl HP               | AD CB | AD HP | other CB | other HP | Cntrl CSF | AD CSF | other CSF | Cntrl Plasma | AD Plasma | other Plasma |
| miR-370   | 21.00    | 20.59                  | 21.56 | 25.38 | 21.78    | 20.94    |           |        |           |              |           |              |
| miR-328   | 20.87    | 20.63                  | 21.10 | 22.32 | 20.83    | 21.08    | 30.32     | 28.89  | 28.66     | 27.01        | 28.09     | 29.03        |
| miR-15a   | 27.36    | 26.41                  | 26.40 | 25.55 | 26.31    | 27.87    | 32.36     | 31.36  | 32.11     | 30.66        | 29.43     | 30.99        |
| miR-138   | 22.77    | 21.38                  | 22.58 | 23.53 | 23.15    | 21.23    |           |        |           |              |           |              |
| miR-132   | 23.33    | 22.78                  | 23.87 | 26.07 | 24.49    | 22.87    | 27.66     | 22.31  | 27.20     | 24.15        | 21.54     | 21.33        |

| $\Delta CT = (\text{Raw CT miRNA}) - (\text{Raw CT mean miR-132})$ |                              |                            |                            | $\Delta\Delta CT = \Delta CT_{\text{brain region 1}} - \Delta CT_{\text{brain region 2}}$ |                                        |                                      |                                          |
|--------------------------------------------------------------------|------------------------------|----------------------------|----------------------------|-------------------------------------------------------------------------------------------|----------------------------------------|--------------------------------------|------------------------------------------|
| $\Delta CT_{\text{Ctrl CB}}$                                       | $\Delta CT_{\text{Ctrl HP}}$ | $\Delta CT_{\text{AD CB}}$ | $\Delta CT_{\text{AD HP}}$ | $\Delta\Delta CT_{\text{ADHP-CtrlHP}}$                                                    | $\Delta\Delta CT_{\text{ADCB-CtrlCB}}$ | $\Delta\Delta CT_{\text{ADHP-ADCB}}$ | $\Delta\Delta CT_{\text{CtrlHP-CtrlCB}}$ |
| 1.02                                                               | 3.03                         | 2.04                       | 7.01                       | 3.98                                                                                      | 1.02                                   | 4.98                                 | 2.01                                     |
| -2.01                                                              | 0.04                         | -0.96                      | 6.00                       | 5.96                                                                                      | 1.04                                   | 6.97                                 | 2.04                                     |
| 3.99                                                               | 10.09                        | 4.05                       | 2.01                       | -8.08                                                                                     | 0.06                                   | -2.05                                | 6.09                                     |
| -0.01                                                              | -1.01                        | 0.02                       | 0.03                       | 1.04                                                                                      | 0.03                                   | 0.01                                 | -1.00                                    |
| 0.00                                                               | 0.00                         | 0.00                       | 0.00                       | 0.00                                                                                      | 0.00                                   | 0.00                                 | 0.00                                     |

| $\Delta CT = (\text{Mean Raw CT miRNA}) - (\text{Mean Raw CT mean miR-132})$ |                                   |                                 |                                 | $\Delta\Delta CT = \text{Mean } \Delta CT_{\text{brain region 1}} - \text{Mean } \Delta CT_{\text{brain region 2}}$ |                                        |                                      |                                          |
|------------------------------------------------------------------------------|-----------------------------------|---------------------------------|---------------------------------|---------------------------------------------------------------------------------------------------------------------|----------------------------------------|--------------------------------------|------------------------------------------|
| Mean $\Delta CT_{\text{Ctrl CB}}$                                            | Mean $\Delta CT_{\text{Ctrl HP}}$ | Mean $\Delta CT_{\text{AD CB}}$ | Mean $\Delta CT_{\text{AD HP}}$ | $\Delta\Delta CT_{\text{ADHP-CtrlHP}}$                                                                              | $\Delta\Delta CT_{\text{ADCB-CtrlCB}}$ | $\Delta\Delta CT_{\text{ADHP-ADCB}}$ | $\Delta\Delta CT_{\text{CtrlHP-CtrlCB}}$ |
| 1.94                                                                         | 2.05                              | 1.69                            | 1.63                            | -0.42                                                                                                               | -0.25                                  | -0.08                                | 0.10                                     |
| -4.43                                                                        | 0.51                              | -0.85                           | 0.02                            | -0.50                                                                                                               | -0.42                                  | 0.80                                 | 0.94                                     |
| 2.82                                                                         | 8.72                              | 3.27                            | 6.16                            | -2.56                                                                                                               | 0.45                                   | 2.89                                 | 5.90                                     |
| 0.48                                                                         | -0.28                             | -0.16                           | -0.47                           | -0.21                                                                                                               | -0.64                                  | -0.31                                | -0.74                                    |
| 0.00                                                                         | 0.00                              | 0.00                            | 0.00                            | 0.00                                                                                                                | 0.00                                   | 0.00                                 | 0.00                                     |

|         |         |       |       |          |          | 41-CT Replicate Means |        |
|---------|---------|-------|-------|----------|----------|-----------------------|--------|
| Ctrl CB | Ctrl HP | AD CB | AD HP | other CB | other HP | Ctrl CSF              | AD CSF |
| 20.00   | 20.41   | 19.44 | 15.62 | 19.22    | 20.06    |                       |        |
| 20.13   | 20.37   | 19.90 | 18.68 | 20.17    | 19.92    | 10.68                 | 12.11  |
| 13.64   | 14.59   | 14.60 | 15.45 | 14.69    | 13.13    | 8.64                  | 9.64   |
| 18.23   | 19.62   | 18.42 | 17.47 | 17.85    | 19.77    |                       |        |
| 17.67   | 18.22   | 17.13 | 14.93 | 16.51    | 18.13    | 13.34                 | 18.69  |

Supplemental Table 8

| Relative Quantification $\Delta\text{CT} = 2^{-\Delta\Delta\text{CT}}$ |              |           |                 |
|------------------------------------------------------------------------|--------------|-----------|-----------------|
| ADHP-CntrlHP                                                           | ADCB-CntrlCB | ADHP-ADCB | CntrlHP-CntrlCB |
| 0.04                                                                   | 0.72         | 0.01      | 0.27            |
| 0.01                                                                   | 0.71         | 0.00      | 0.28            |
| 6484.35                                                                | 1.89         | 15.50     | 0.00            |
| 0.71                                                                   | 1.95         | 1.97      | 5.44            |
| 2.00                                                                   | 2.00         | 2.00      | 2.00            |

| Relative Quantification $\Delta\text{CT} = 2^{-\Delta\Delta\text{CT}}$ |              |           |                 |
|------------------------------------------------------------------------|--------------|-----------|-----------------|
| ADHP-CntrlHP                                                           | ADCB-CntrlCB | ADHP-ADCB | CntrlHP-CntrlCB |
| 3.04                                                                   | 2.58         | 2.13      | 1.81            |
| 3.28                                                                   | 3.04         | 0.84      | 0.78            |
| 25.96                                                                  | 1.27         | 0.11      | 0.01            |
| 2.47                                                                   | 3.79         | 2.74      | 4.19            |
| 2.00                                                                   | 2.00         | 2.00      | 2.00            |

| other CSF | Cntrl Plasma | AD Plasma | other Plasma |
|-----------|--------------|-----------|--------------|
| 12.34     | 13.99        | 12.91     | 11.97        |
| 8.89      | 10.34        | 11.57     | 10.01        |
| 13.80     | 16.85        | 19.46     | 19.67        |

**Supplemental Table 8.** Data from phase I - III for 5 miRNA; miR-370, miR-328, miR-138, miR-132 and miR-15a. Data is normalized to miR-132. Raw CT, 41-CT, relative quantification ratios,  $\Delta$ CT,  $\Delta\Delta$ CT, and  $2^{-\Delta\Delta$ CT for all phases of the study are shown.

| RQ of Raw CT Replicate Means |              |           |                 |                |                |                   |                      |                      |                         |
|------------------------------|--------------|-----------|-----------------|----------------|----------------|-------------------|----------------------|----------------------|-------------------------|
| ADHP/CntrlHP                 | ADCB/CntrlCB | ADHP/ADCB | CntrlHP/CntrlCB | ADCSF/CntrlCSF | ADCSF/otherCSF | otherCSF/cntrlCSF | ADPlasma/CntrlPlasma | ADPlasma/otherPlasma | otherPlasma/cntrlPlasma |
| 1.23                         | 1.03         | 1.18      | 0.98            |                |                |                   |                      |                      |                         |
| 1.08                         | 1.01         | 1.06      | 0.99            | 0.95           | 1.01           | 0.95              | 1.04                 | 0.97                 | 1.07                    |
| 0.97                         | 0.96         | 0.97      | 0.97            | 0.97           | 0.98           | 0.99              | 0.96                 | 0.95                 | 1.01                    |
| 1.10                         | 0.99         | 1.04      | 0.94            |                |                |                   |                      |                      |                         |
| 1.14                         | 1.02         | 1.09      | 0.98            | 0.81           | 0.82           | 0.98              | 0.89                 | 1.01                 | 0.88                    |

Supplemental Table 8

| RQ of 41-CT Replicate Means |              |           |                 |               |               |                   |                      |                      |                         |
|-----------------------------|--------------|-----------|-----------------|---------------|---------------|-------------------|----------------------|----------------------|-------------------------|
| ADHP/CntriHP                | ADCb/CntriCb | ADHP/ADCb | CntriHP/CntriCb | ADCb/CntriCSF | ADCb/otherCSF | otherCSF/cntriCSF | ADPlasma/CntriPlasma | ADPlasma/otherPlasma | otherPlasma/cntriPlasma |
| 0.77                        | 0.97         | 0.80      | 1.02            |               |               |                   |                      |                      |                         |
| 0.92                        | 0.99         | 0.94      | 1.01            | 1.13          | 0.98          | 1.16              | 0.92                 | 1.08                 | 0.86                    |
| 1.06                        | 1.07         | 1.06      | 1.07            | 1.12          | 1.08          | 1.03              | 1.12                 | 1.16                 | 0.97                    |
| 0.89                        | 1.01         | 0.95      | 1.08            |               |               |                   |                      |                      |                         |
| 0.82                        | 0.97         | 0.87      | 1.03            | 1.40          | 1.35          | 1.03              | 1.15                 | 0.99                 | 1.17                    |



Supplemental Table 8

| ΔCT = (Mean Raw CT miRNA) - (Mean Raw CT mean miR-132) |          |       |       |          |          |           |        |           |              |           |              | ΔΔCT = Mean ΔCT <sub>Brain region 1</sub> - Mean ΔCT <sub>Brain region 2</sub> |              |           |                 |                |                |                   |                      |                      |                         |
|--------------------------------------------------------|----------|-------|-------|----------|----------|-----------|--------|-----------|--------------|-----------|--------------|--------------------------------------------------------------------------------|--------------|-----------|-----------------|----------------|----------------|-------------------|----------------------|----------------------|-------------------------|
| Cntrl CB                                               | Cntrl HP | AD CB | AD HP | other CB | other HP | Cntrl CSF | AD CSF | other CSF | Cntrl Plasma | AD Plasma | other Plasma | ADHP-CntrlHP                                                                   | ADCB-CntrlCB | ADHP-ADCB | CntrlHP-CntrlCB | ADCSF-CntrlCSF | ADCSF-otherCSF | otherCSF-cntrlCSF | ADPlasma-CntrlPlasma | ADPlasma-otherPlasma | otherPlasma-cntrlPlasma |
| -2.33                                                  | -2.19    | -2.31 | -0.70 | -2.71    | -1.94    |           |        |           |              |           |              | 1.49                                                                           | 0.02         | 1.61      | 0.14            |                |                |                   |                      |                      |                         |
| -2.46                                                  | -2.15    | -2.77 | -3.75 | -3.66    | -1.79    | 2.66      | 6.58   | 1.46      | 2.86         | 6.54      | 7.70         | -1.60                                                                          | -0.31        | -0.98     | 0.31            | 3.92           | 5.12           | -1.20             | 3.69                 | -1.16                | 4.84                    |
| 4.03                                                   | 3.63     | 2.53  | -0.52 | 1.82     | 5.00     | 4.70      | 9.05   | 4.91      | 6.51         | 7.89      | 9.67         | -4.15                                                                          | -1.50        | -3.05     | -0.41           | 4.35           | 4.14           | 0.21              | 1.38                 | -1.78                | 3.16                    |
| -0.55                                                  | -1.40    | -1.29 | -2.54 | -1.34    | -1.64    |           |        |           |              |           |              | -1.14                                                                          | -0.74        | -1.25     | -0.85           |                |                |                   |                      |                      |                         |
| 0.00                                                   | 0.00     | 0.00  | 0.00  | 0.00     | 0.00     | 0.00      | 0.00   | 0.00      | 0.00         | 0.00      | 0.00         | 0.00                                                                           | 0.00         | 0.00      | 0.00            | 0.00           | 0.00           | 0.00              | 0.00                 | 0.00                 | 0.00                    |

Supplemental Table 8

| ADHP-CntrlIP | ADCB-CntrlCB | ADHP-ADCB | CntrlIP-CntrlCB | Relative Quantification $\Delta CT = 2^{-\Delta} \cdot \text{Mean } \Delta \Delta CT$ |                |                   |                      |                      |                         |
|--------------|--------------|-----------|-----------------|---------------------------------------------------------------------------------------|----------------|-------------------|----------------------|----------------------|-------------------------|
|              |              |           |                 | ADCSF-CntrlCSF                                                                        | ADCSF-otherCSF | otherCSF-cntrlCSF | ADPlasma-CntrlPlasma | ADPlasma-otherPlasma | otherPlasma-cntrlPlasma |
| 0.45         | 1.96         | 0.40      | 1.74            |                                                                                       |                |                   |                      |                      |                         |
| 9.91         | 2.72         | 5.35      | 1.47            | 0.04                                                                                  | 0.01           | 6.65              | 0.05                 | 6.36                 | 0.02                    |
| 127.31       | 9.01         | 42.40     | 3.00            | 0.03                                                                                  | 0.03           | 1.63              | 0.50                 | 11.83                | 0.08                    |
| 6.27         | 4.17         | 7.01      | 4.66            |                                                                                       |                |                   |                      |                      |                         |
| 2.00         | 2.00         | 2.00      | 2.00            | 2.00                                                                                  | 2.00           | 2.00              | 2.00                 | 2.00                 | 2.00                    |

Supplemental Table 9.

| ID | Phase | APOE e4 | Age | Gender | Age-at-onset | Diagnosis | PMI  | PlaqueScore | BraakStage |
|----|-------|---------|-----|--------|--------------|-----------|------|-------------|------------|
| 1  | I&II  | e4-     | 90  | M      |              | CTRL      | 5    | ABSENT      | II         |
| 2  | I&II  | e4-     | 86  | M      |              | CTRL      | 2.3  | ABSENT      | II         |
| 3  | I&II  | e4-     | 88  | F      |              | CTRL      | 7    | ABSENT      | I          |
| 4  | I&II  | e4-     | 77  | F      |              | CTRL      | 5.4  | ABSENT      | II         |
| 5  | I&II  | e4-     | 79  | F      |              | CTRL      | 2.3  | ABSENT      | II         |
| 6  | I&II  | e4-     | 92  | F      |              | CTRL      | 5.3  | ABSENT      | II         |
| 7  | I&II  | e4-     | 94  | F      |              | CTRL      | 6    | SPARSE      | III        |
| 8  | I&II  | e4-     | 90  | M      |              | CTRL      | 7    | SPARSE      | II         |
| 9  | I&II  | e4-     | 95  | F      |              | CTRL      | 4    | SPARSE      | I          |
| 10 | I&II  | e4-     | 93  | M      |              | CTRL      | 4    | SPARSE      | III        |
| 11 | I&II  | e4-     | 94  | M      |              | CTRL      | 6    | SPARSE      | IV         |
| 12 | I&II  | e4-     | 87  | M      |              | CTRL      | 7.3  | SPARSE      | II         |
| 13 | I&II  | e4-     | 82  | F      |              | CTRL      | 3    | SPARSE      | III        |
| 14 | I&II  | e4-     | 81  | M      |              | CTRL      | 6    | SPARSE      | II         |
| 15 | I&II  | e4+     | 85  | M      |              | CTRL      | 4.3  | SPARSE      | III        |
| 16 | I&II  | e4+     | 82  | F      |              | CTRL      | 3.3  | SPARSE      | III        |
| 17 | I&II  | e4+     | 86  | M      |              | CTRL      | 6.1  | MOD         | II         |
| 18 | I&II  | e4-     | 89  | F      |              | CTRL      | 5.3  | MOD         | I          |
| 19 | I&II  | e4-     | 94  | M      |              | CTRL      | 4.5  | MOD         | I          |
| 20 | I&II  | e4+     | 79  | F      |              | CTRL      | 3    | MOD         | II         |
| 21 | I&II  | e4-     | 84  | M      |              | CTRL      | 2.3  | MOD         | III        |
| 22 | I&II  | e4-     | 60  | F      | 55           | AD        | 7.3  | MOD         | IV         |
| 23 | I&II  | e4-     | 87  | F      | 83           | AD        | 5    | MOD         | VI         |
| 24 | I&II  | e4+     | 78  | M      | 62           | AD        | 4.2  | MOD         | V          |
| 25 | I&II  | e4-     | 91  | F      | 89           | AD        | 5.3  | MOD         | V          |
| 26 | I&II  | e4+     | 78  | F      | 69           | AD        | 2.2  | MOD         | V          |
| 27 | I&II  | e4+     | 87  | F      | 75           | AD        | 5.3  | MOD         | VI         |
| 28 | I&II  | e4+     | 82  | M      | 76           | AD        | 8    | FREQ        | IV         |
| 29 | I&II  | e4+     | 81  | M      | 68           | AD        | 5    | FREQ        | V          |
| 30 | I&II  | e4+     | 78  | M      | 63           | AD        | 7.2  | FREQ        | VI         |
| 31 | I&II  | e4+     | 84  | F      | 73           | AD        | 5    | FREQ        | VI         |
| 32 | I&II  | e4+     | 93  | F      | 84           | AD        | 6.3  | FREQ        | VI         |
| 33 | I&II  | e4+     | 76  | M      | 65           | AD        | 4.3  | FREQ        | VI         |
| 34 | I&II  | e4+     | 85  | M      | 80           | AD        | 5    | FREQ        | VI         |
| 35 | I&II  | e4+     | 74  | M      | 69           | AD        | 5.2  | FREQ        | VI         |
| 36 | I&II  | e4+     | 75  | M      | 71           | AD        | 3.1  | FREQ        | VI         |
| 37 | I&II  | e4-     | 85  | M      | 81           | AD        | 3.2  | FREQ        | V          |
| 38 | I&II  | e4-     | 89  | F      | 85           | AD        | 2.3  | FREQ        | VI         |
| 39 | I&II  | e4+     | 79  | F      | 71           | AD        | 4    | FREQ        | VI         |
| 40 | I&II  | e4-     | 87  | F      | 80           | AD        | 6    | FREQ        | VI         |
| 41 | I&II  | e4-     | 78  | F      | 71           | AD        | 5.3  | FREQ        | VI         |
| 42 | I&II  | e4+     | 83  | M      | 74           | AD        | 8.3  | FREQ        | VI         |
| 43 | III   | e4-     | 77  | F      | .            | CNTL      | 6.00 | ABSENT      | III        |
| 44 | III   | e4-     | 102 | F      | .            | CNTL      | 3.30 | SPARSE      | III        |
| 45 | III   | e4+     | 79  | F      | .            | CNTL      | 5.30 | SPARSE      | III        |
| 46 | III   | e4+     | 56  | M      | 52           | FTD       | 3.00 | SPARSE      | II         |
| 47 | III   | e4-     | 67  | M      | 60           | FTD       | 9.30 | ABSENT      | 0          |
| 48 | III   | e4-     | 90  | M      | 85           | PDD       | 3.15 | SPARSE      | II         |
| 49 | III   | e4-     | 60  | M      | 53           | AD-LBV    | 4.30 | FREQ        | IV         |
| 50 | III   | e4+     | 68  | F      | 64           | AD-LBV    | 4.10 | FREQ        | V          |
| 51 | III   | e4+     | 74  | M      | 64           | DLB       | 3.00 | FREQ        | III        |
| 52 | III   | e4+     | 59  | M      | 53           | AD        | 4.00 | FREQ        | VI         |
| 53 | III   | e4+     | 85  | M      | 71           | AD        | 8.00 | FREQ        | VI         |
| 54 | III   | e4+     | 72  | M      | 69           | AD        | 3.45 | FREQ        | V          |

**Supplemental Table 9.** Demographic data for each subject in each phase of the investigation.

Supplemental Figure 1. Phase III cerebellum (CB), hippocampus (HP), cerebrospinal fluid (CSF) and plasma miRNA levels from controls, AD and other neurodegenerative diseases (n=12). 5 miRNAs shown to have high sensitivity and specificity and high correlation with plaque score or Braak stage in phase II were tested for correlation between tissues in phase III. There is not a significant correlation between CB and HP for any of the miRNAs (Panel A). 3 of the 5 miRNAs are detected in CSF and plasma (Panels B, C and D). There is not a significant correlation between CSF and plasma for any of the expressed miRNAs (Panel B). HP miR-15a levels are marginally correlated with CSF (p-value, 0.0630) and plasma levels (p-value, 0.0865) (Panels C and D, respectively).

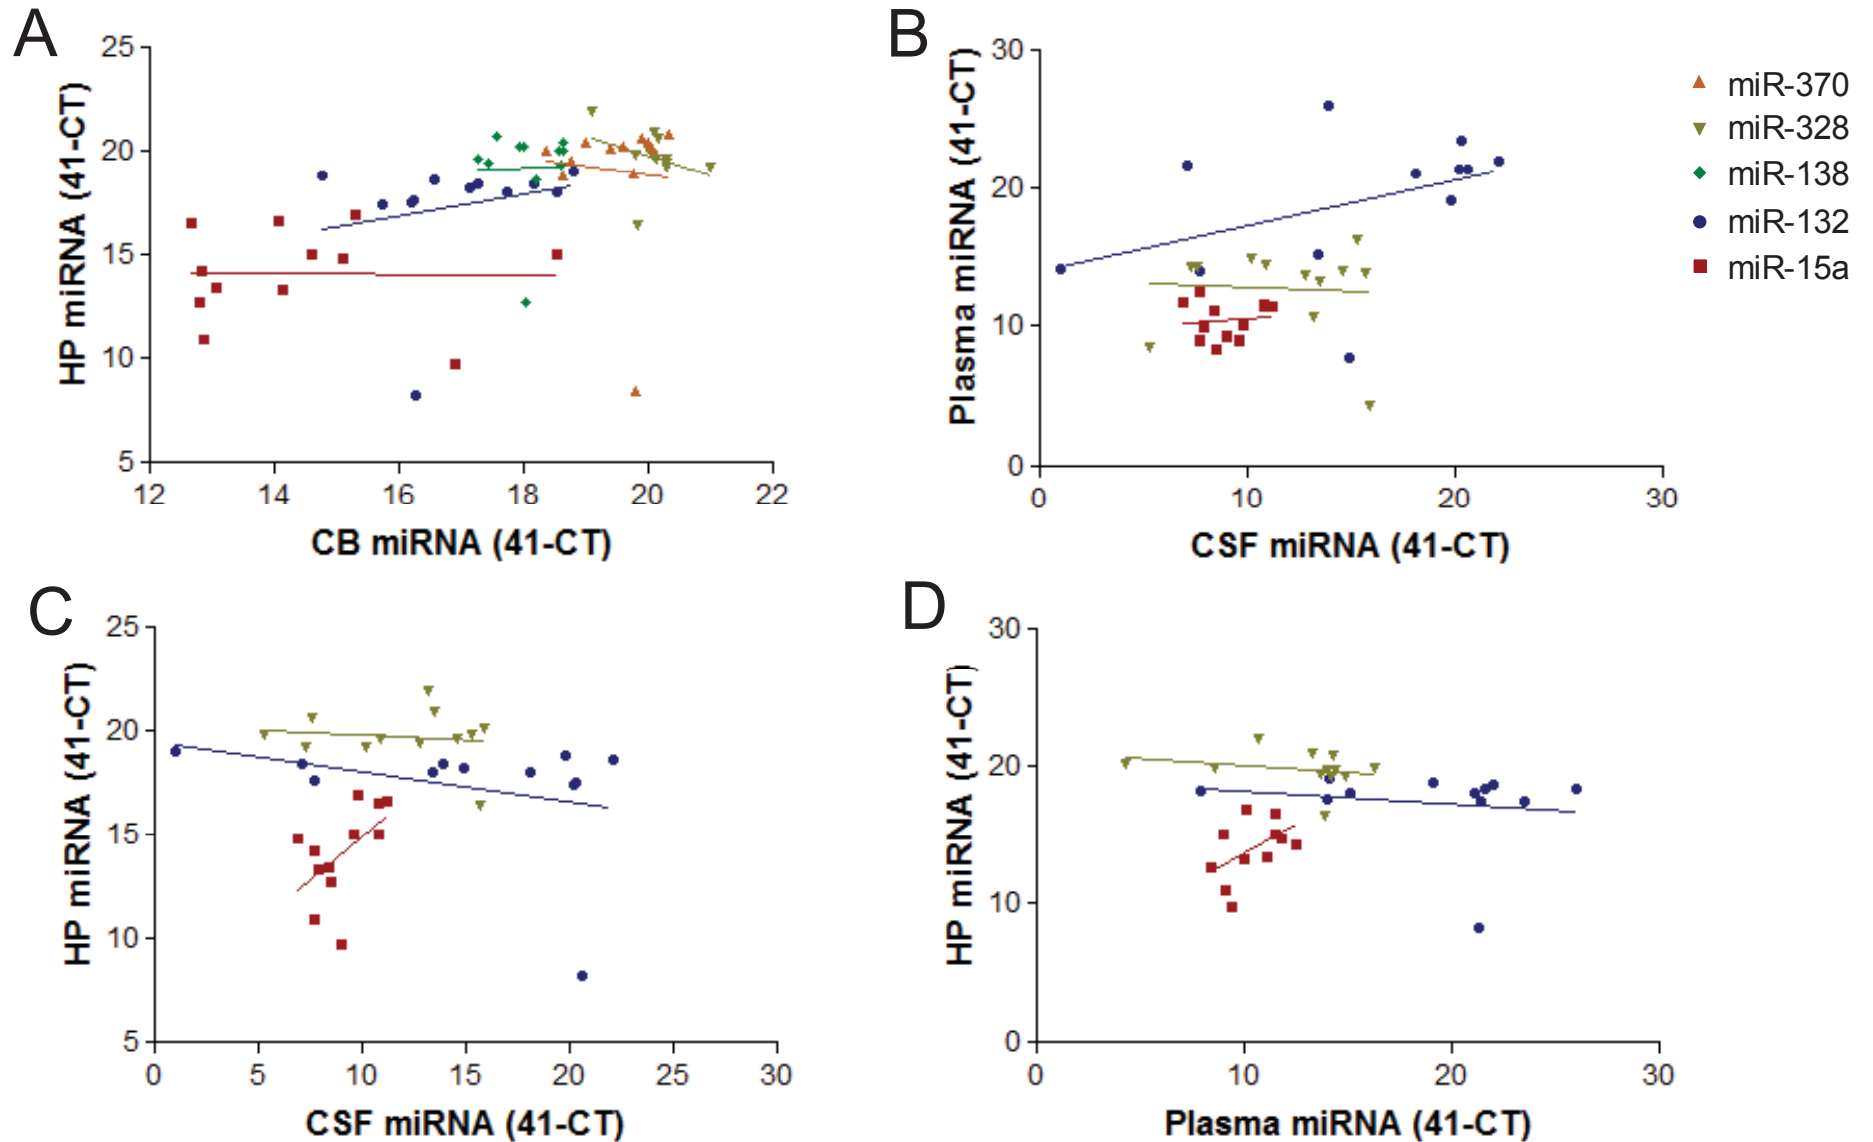

Supplemental Figure 2. Phase III (n=12) CB, HP, CSF and plasma miR-15a levels. Plasma miR-15a levels significantly positively correlate with Braak stage (0.0446) (Panel A) (significance does not remain after taking into account multiple comparisons). No significant difference between low and high Braak stage subjects (p-value, 0.2167)(Panel B).

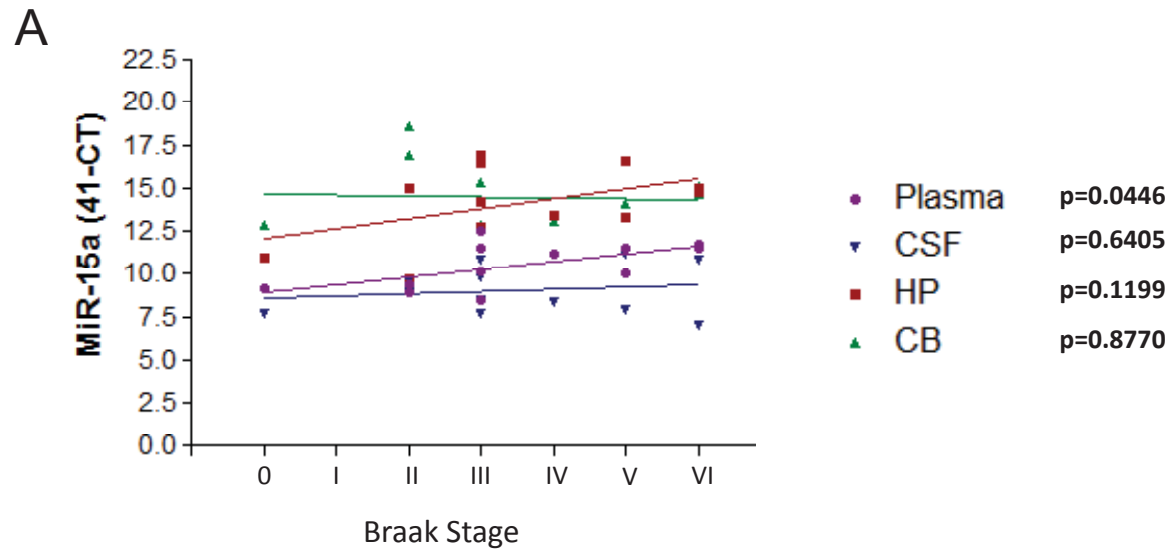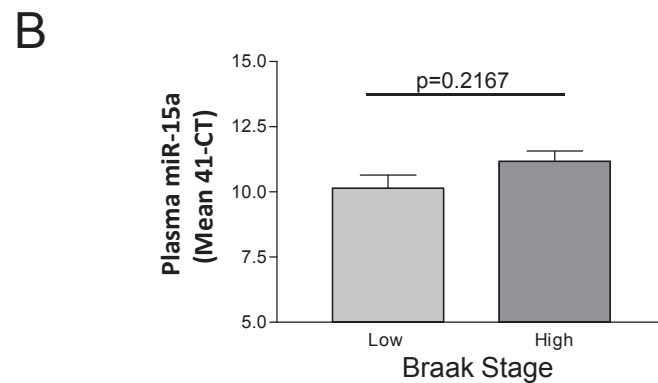

Supplemental Figure 3. Human cell line miRNA expression levels (qRT-PCR: 41-CT values). Expression levels for 5 miRNA in 7 human cell lines: U138 (glioblastoma), U118 (glioblastoma/astrocytoma), U87 (glioblastoma), IMR32 (neuroblastoma), CHP212 (neuroblastoma), SHSY5Y (neuroblastoma), HepG2 (heptocellular carcinoma) (Panel A). MiR-15a neuroblastoma expression level (IMR32, CHP212, SHSY5Y) is lower than glioblastoma/astrocytoma expression (U138, U118, U87) (Panel B; p-value, 0.0396).

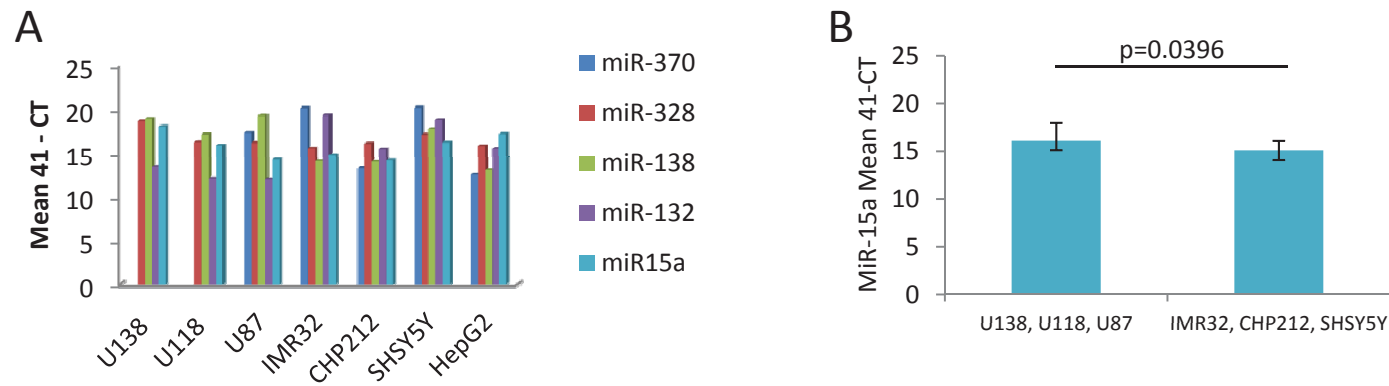

Supplemental Figure 4. AD relevant gene target prediction using microRNA.org for phase III miRNA (n=5) . MiR-15a and MiR-370 are predicted to target AD relevant genes. MiR-15a is predicted to target 9 genes and miR-370, 7 genes. MiR-328 and miR-132 are predicted to target 4 and miR-138 5 AD relevant genes

| <b>Gene Target Name</b>          | <b>MicroRNA Prediction</b> |
|----------------------------------|----------------------------|
| <b>APP Pathway Genes</b>         |                            |
| <i>PSEN1</i>                     | 328                        |
| <i>PSEN2</i>                     | 370                        |
| <i>APP</i>                       | 15a                        |
| <i>ADAM10</i>                    | 132, 15a                   |
| <b>Tau Phosphorylation Genes</b> |                            |
| <i>MAPT</i>                      | 370, 328, 138, 15a         |
| <i>FYN</i>                       | 15a                        |
| <i>PPP2R4</i>                    | 370, 328, 15a              |
| <b>GWAS Genes</b>                |                            |
| <i>APOE</i>                      | 370                        |
| <i>BIN1</i>                      | 138, 15a                   |
| <i>CLU</i>                       | 370, 15a                   |
| <i>ABCA7</i>                     | -                          |
| <i>CR1</i>                       | 370, 328, 138, 132, 15a    |
| <i>PICALM</i>                    | 132                        |
| <i>MS4A6A</i>                    | -                          |
| <i>CD33</i>                      | 138                        |
| <i>MS4A4E</i>                    | 370                        |
| <i>CD2AP</i>                     | 138, 132, 15a              |
